# Supplementary material for: Genome-Wide Profiling of Prognostic Alternative Splicing Signature in Colorectal Cancer
Source: Front Oncol. 2018 Nov 20;8:537. doi: 10.3389/fonc.2018.00537 (PMC6262947; doi:10.3389/fonc.2018.00537)
Supplement: Supplementary file 1 [file Table_1.XLSX]

## Sheet: CRC univariate COX regression
Gene	As-id	HR	Lower95	Upper95	Pvalue	Splice-type	Exons	From-exon	To-exon	Novel-splice
ZBED5	14401	1.36437	1.20561	1.54404	8.54832e-07	AA	3.1	2	3.2	0
FAM173A	32964	1.2309	1.10346	1.37307	0.000195102	AA	4.1:4.2	3	4.3	0
FAM122B	90156	0.74648	0.635675	0.8766	0.000361814	AA	10.1	9	10.2	0
PCNP	65964	1.42666	1.17075	1.73852	0.000426871	AA	2.1	1	2.2	0
CSRP2BP	58756	1.23517	1.09703	1.39071	0.00048241	AA	5.1	4	5.2	0
PPM1B	53415	1.49229	1.18112	1.88544	0.00079317	AA	6.1	5	6.2	0
PDPR	37332	1.28673	1.10808	1.49419	0.000947771	AA	13.1	12	13.2	0
MECR	1426	1.3066	1.10848	1.54013	0.00143485	AA	2.1	1	2.2	0
MYO19	40482	1.27416	1.09226	1.48636	0.00205101	AA	21.1	20	21.2	0
GORASP1	64155	1.29038	1.09581	1.51949	0.00223438	AA	4.1	3	4.2	0
LMF2	62836	1.19788	1.06585	1.34628	0.00244421	AA	2.1	1	2.2	0
PTGR1	87219	1.30779	1.09784	1.55789	0.0026517	AA	12.1	11	12.2	0
FUBP1	3544	1.47772	1.14355	1.90954	0.00283135	AA	21.1	20	21.2	0
UCHL5	9244	1.28934	1.0876	1.52849	0.00341984	AA	13.1	12	13.2	0
B3GAT3	16371	1.2521	1.07665	1.45616	0.00351504	AA	6.1:6.2	5	6.3	0
SRSF5	28158	1.17224	1.05326	1.30467	0.00361321	AA	8.1	7.2	8.2	0
FAM86B1	82715	1.19088	1.05787	1.34061	0.00384077	AA	3.1	1.2	3.2	0
CD58	4363	1.22717	1.06614	1.41253	0.00433986	AA	5.1	4.1	5.2	0
INO80C	45175	1.23888	1.0683	1.4367	0.00459466	AA	4.1	3	4.2	0
SNAP23	30179	1.54398	1.14279	2.08602	0.00466426	AA	5.1:5.2	4	5.3	0
CYB561A3	16164	1.16201	1.04718	1.28944	0.00468069	AA	6.6	6.4	6.7	0
PKMYT1	33330	1.30561	1.08447	1.57184	0.00485655	AA	9.1:9.2	8	9.3	0
IL17RE	63242	1.18476	1.0528	1.33327	0.00489318	AA	15.1	14	15.2	0
HMG20B	46704	1.53064	1.13576	2.06282	0.00517157	AA	4.1	3	4.2	0
SYNGR2	43775	1.25121	1.06817	1.46562	0.00548435	AA	4.1:4.2	3.2	4.3	0
FAM86C1	17444	0.78342	0.659023	0.931298	0.00566176	AA	3.1	2	3.2	0
SRSF7	53281	1.63757	1.15377	2.32423	0.00577051	AA	4.3:4.4:4.5	4.1	4.6	0
ACHE	81030	0.839597	0.740699	0.9517	0.00625371	AA	4.1:4.2:4.3	3.5	4.4	0
CELF1	15763	1.30286	1.07744	1.57543	0.00634238	AA	18.1:18.2	17	18.3	0
CGGBP1	65668	1.2647	1.06791	1.49775	0.00650027	AA	5.2:5.3	4	5.4	0
GTPBP3	48295	1.08995	1.02296	1.16133	0.00778024	AA	3.1	2.2	3.2	0
FAM135A	76637	1.14393	1.03519	1.2641	0.00832437	AA	16.1	15	16.2	0
ERRFI1	538	1.3336	1.07562	1.65344	0.00867492	AA	3.1	2	3.2	0
SCAF4	60336	0.762341	0.622276	0.933932	0.00879649	AA	19.1	18	19.2	0
PIGH	28079	0.673453	0.500797	0.905635	0.00890193	AA	2.1	1	2.2	0
FAM73B	87819	1.29834	1.06718	1.57957	0.00905697	AA	15.1	14	15.2	0
FAM3A	90637	1.24775	1.05655	1.47354	0.00910246	AA	3.1	2	3.2	0
NAA40	16552	1.12891	1.02973	1.23766	0.00975859	AA	4.1	3	4.2	0
NUSAP1	30081	0.66671	0.489666	0.907765	0.0100385	AA	5.1	4	5.2	0
URI1	48864	0.73905	0.586788	0.930823	0.0101997	AA	13.1	12	13.2	0
HCFC1	90542	0.722715	0.564084	0.925956	0.0102169	AA	19.1	18	19.2	0
ANKRD54	62167	0.745859	0.594022	0.936506	0.0115757	AA	5.1	4	5.2	0
MXD1	53863	1.33708	1.06517	1.67841	0.0122719	AA	5.1	4	5.2	0
BTN3A1	75662	0.747723	0.594538	0.940378	0.012936	AA	4.1	3	4.2	0
NPRL2	65041	1.17386	1.03439	1.33213	0.0129923	AA	3.1:3.2:3.3	2.1	3.4	0
GCNT3	30934	1.09993	1.02012	1.18598	0.0132012	AA	2.1	1	2.2	0
CTDSP1	57478	0.700488	0.528423	0.928579	0.0133164	AA	4.1	3	4.2	0
IFI27	29077	1.1996	1.03792	1.38647	0.0137434	AA	3.1	2	3.2	1
ALS2CL	64464	1.11811	1.02243	1.22273	0.0144414	AA	18.3	18.1	18.4	0
DYNC2LI1	53400	1.16435	1.03068	1.31536	0.0144582	AA	8.1	7	8.2	0
ARL6IP4	25026	0.740808	0.581916	0.943084	0.0148622	AA	3.1:3.2	2.2	3.3	0
CDV3	66838	1.47978	1.07898	2.02947	0.0150319	AA	7.1:7.2:7.3	6.2	7.4	0
CD320	47214	1.40753	1.06855	1.85405	0.0150325	AA	2.1	1	2.2	0
MMS19	12718	1.46392	1.07522	1.99313	0.0154941	AA	17.1	16	17.2	0
TCF3	46538	1.1884	1.03305	1.3671	0.015737	AA	19.3	19.1	19.4	0
DDX39A	47975	1.38235	1.06154	1.80012	0.0162516	AA	7.1	6	7.2	0
SETD6	36663	1.16899	1.02913	1.32785	0.0163199	AA	6.1	5	6.2	0
MRPL4	47484	2.12864	1.14393	3.96098	0.0171083	AA	7.1	6.3	7.2	0
DGKZ	15548	0.725603	0.557065	0.945131	0.0173875	AA	9.1	8.2	9.2	0
D2HGDH	58424	0.850241	0.743706	0.972036	0.0175397	AA	5.1	4	5.2	0
SLC35B1	42317	0.762358	0.60904	0.954271	0.017858	AA	3.1	2	3.2	0
RPL17	94829	0.701101	0.522191	0.94131	0.0181605	AA	3.2:3.3	2	3.4	1
BMP1	82992	1.14728	1.02361	1.28589	0.0182258	AA	18.1	16	18.2	0
TSC2	33195	1.21786	1.03367	1.43489	0.0184877	AA	28.1	26	28.2	0
MZB1	73602	1.34152	1.04679	1.71923	0.0202754	AA	2.1:2.2	1	2.3	0
RPLP0	24740	0.684532	0.496465	0.943842	0.020744	AA	1.3	1.1	1.4	0
IL17RE	63243	1.20386	1.02811	1.40964	0.0212045	AA	15.1:15.2	14	15.3	0
CDV3	66839	1.16465	1.02285	1.3261	0.0213879	AA	7.2:7.3	6.2	7.4	0
NAT6	64990	0.874729	0.780108	0.980826	0.0219395	AA	3.2	1	3.3	0
STAT3	41034	0.501809	0.278179	0.905214	0.0219746	AA	23.1	22	23.2	0
DCTN3	86187	1.103	1.01425	1.19951	0.0219876	AA	3.3:3.4	3.1	3.5	0
PPIL2	61242	1.09468	1.01299	1.18295	0.0222427	AA	22.4:22.5	22.2	22.6	0
HOXB6	42211	1.22403	1.02909	1.45589	0.0223719	AA	2.1	1.3	2.2	0
FMR1	90267	0.809157	0.674624	0.970517	0.0224579	AA	18.1	17	18.2	0
PCYT2	44231	1.18639	1.02349	1.37521	0.0233209	AA	3.1	2	3.2	0
GMPPA	95766	0.834636	0.713515	0.976317	0.0238479	AA	2.1	1.3	2.2	1
SERPINE2	57771	1.52539	1.05595	2.20353	0.0244446	AA	10.1	9	10.2	0
ZFP69	2001	0.84402	0.727938	0.978613	0.0246824	AA	2.1	1	2.2	0
SMCO4	18302	0.778172	0.624976	0.968919	0.0249456	AA	4.1	3.2	4.2	0
CRTC3	32490	0.848315	0.734224	0.980135	0.0255991	AA	16.1	15	16.2	0
GPR89A	7312	1.22698	1.02484	1.46897	0.0259376	AA	7.1	6	7.2	0
RAP1GAP	985	1.27093	1.02817	1.57102	0.0266348	AA	26.1	25.2	26.2	0
THAP3	489	0.780002	0.625008	0.973433	0.0279354	AA	4.1	3	4.2	0
EDF1	88231	0.51859	0.288128	0.933389	0.0285352	AA	4.3	4.1	4.4	0
NOL8	86848	1.16482	1.01577	1.33575	0.028971	AA	16.1	15	16.2	0
FTSJ1	88966	1.40769	1.03377	1.91686	0.0299451	AA	11.1	10	11.2	0
ZNF738	48765	1.09975	1.00926	1.19835	0.0299784	AA	7.1:7.2	6.1	7.3	0
KRT80	21893	1.2113	1.01874	1.44027	0.0299982	AA	9.1	8	9.2	0
CKLF	36734	1.53377	1.04204	2.25755	0.0300994	AA	3.1	1	3.2	0
BTBD3	58698	1.09829	1.00847	1.19611	0.0312606	AA	2.1:2.2	1	2.3	0
ABTB1	66621	1.20158	1.01656	1.42026	0.0313566	AA	2.2	1	2.3	0
HDGFRP2	46805	0.770032	0.606909	0.976997	0.0314317	AA	17.1	16	17.2	0
ATXN2L	35861	1.57208	1.04072	2.37473	0.0315842	AA	11.1	10	11.2	0
RAVER2	3285	1.28391	1.02205	1.61286	0.0317606	AA	7.1	6	7.2	0
KANSL1	42013	0.761806	0.593065	0.978556	0.0332008	AA	13.1	12	13.2	0
C11orf80	17121	1.18057	1.01325	1.37553	0.0332773	AA	15.1	14	15.2	0
SRSF2	43664	1.53989	1.03075	2.30054	0.0350463	AA	2.3:2.4	2.1	2.5	0
BCL2L14	20499	1.4215	1.02397	1.97335	0.0355983	AA	9.1	8	9.2	0
RIC8A	13587	2.09082	1.04759	4.17296	0.0364553	AA	6.1	5	6.2	0
POLM	79455	1.46385	1.02328	2.09412	0.0369858	AA	9.1	8	9.2	0
TLE3	31417	0.814305	0.670857	0.988428	0.0377376	AA	8.1	7.1	8.2	0
LSM7	46607	0.565702	0.329995	0.969768	0.0383033	AA	3.1	2	3.2	0
LPAR2	48665	1.10581	1.00495	1.21679	0.0392801	AA	5.1	2.2	5.2	0
HNF1B	40546	0.818647	0.676402	0.990804	0.0398952	AA	3.1	2	3.2	0
MINK1	38599	0.741387	0.557112	0.986615	0.0401319	AA	17.1	16	17.2	0
TKT	65304	1.22133	1.009	1.47834	0.0401796	AA	6.1	5	6.2	0
ELAC1	45556	0.871848	0.764746	0.993948	0.0402932	AA	3.1	2	3.2	0
DYNC1I2	55942	0.501367	0.259039	0.97039	0.0404452	AA	20.1	19	20.2	0
NARG2	30965	0.876574	0.772603	0.994537	0.0408545	AA	4.1	3	4.2	0
MECOM	67573	0.85305	0.732455	0.993501	0.0409725	AA	12.1	11	12.2	0
PSME2	26864	1.39926	1.01277	1.93323	0.0416589	AA	3.1	2	3.2	0
ATAD3A	176	1.13274	1.00458	1.27725	0.0418916	AA	4.1	3	4.2	0
BABAM1	48259	1.18067	1.00605	1.3856	0.0419626	AA	2.1	1.2	2.2	0
MGRN1	33780	1.1534	1.0047	1.32412	0.0427094	AA	17.1:17.2	16	17.3	0
CMTM7	63814	1.4403	1.01084	2.05221	0.043419	AA	4.1	3	4.2	0
TOM1L1	42563	1.4311	1.01029	2.02718	0.0436334	AA	3.1	2	3.2	0
TMEM44	68163	0.77	0.596902	0.993296	0.0442477	AA	13.1	12	13.2	0
DPH2	2500	1.22244	1.00507	1.48682	0.0443657	AA	3.1	2.1	3.2	0
C19orf43	47857	1.51525	1.01049	2.27214	0.0443817	AA	2.1	1.2	2.2	0
PCBP2	22059	0.627	0.397743	0.988399	0.0444085	AA	11.1	10	11.2	0
RNF43	42678	0.828556	0.689666	0.995416	0.0445328	AA	1.3	1.1	1.4	0
FAM111A	16027	1.08799	1.00201	1.18135	0.0446553	AA	3.1:3.2	2	3.3	0
NR4A2	55618	1.2587	1.00452	1.57721	0.0455963	AA	9.1:9.2	8	9.3	0
PSMD9	24910	2.06793	1.01158	4.22738	0.0464233	AA	6.1	4	6.2	0
ATG16L2	17653	1.23736	1.0028	1.52677	0.0470283	AA	4.1	3	4.2	0
RPS21	60075	1.11331	1.00102	1.23821	0.0478466	AA	3.3:3.4	3.1	3.5	1
BRPF3	75967	1.24236	1.00179	1.54071	0.0481252	AA	6.1	5	6.2	0
CRYZL1	60459	1.27823	1.00167	1.63117	0.0484571	AA	12.1	11	12.2	0
DPH5	3896	1.5007	1.00273	2.24598	0.0484708	AA	8.1	7	8.2	0
RBM26	26101	1.20263	1.00112	1.44469	0.0486129	AA	13.1	12	13.2	0
RAB3IP	23354	1.62386	1.25544	2.10039	0.000221859	AD	8.2	8.1	9.1	0
METTL23	43652	0.835065	0.754398	0.924357	0.000506116	AD	1.2:1.3	1.1	3	0
ZNF514	54488	0.838666	0.759463	0.926129	0.000508598	AD	1.2	1.1	2	0
COPB1	14469	1.26718	1.108	1.44923	0.000545442	AD	1.2	1.1	2	0
TP53I11	15505	0.692396	0.562032	0.852998	0.000552587	AD	1.2	1.1	6.2	0
CEP68	53781	1.32822	1.1294	1.56203	0.000601583	AD	3.3	3.2	4.1	0
HMBS	19107	1.84582	1.28256	2.65644	0.000967788	AD	1.2	1.1	4	0
FDPS	8075	1.49681	1.17705	1.90344	0.00100408	AD	1.2	1.1	3.2	1
PIGG	68359	0.710892	0.57753	0.875049	0.00128575	AD	9.2:9.3	9.1	10.1	0
IRF3	50988	1.31303	1.11087	1.55198	0.00141031	AD	5.2	5.1	6.2	0
C19orf25	46506	1.66537	1.21063	2.29093	0.0017204	AD	1.6	1.5	2.2	0
ATP5J	60267	1.31934	1.10787	1.57117	0.00187578	AD	1.4	1.3	3	0
PDLIM2	83030	0.816734	0.718371	0.928564	0.00198848	AD	1.2	1.1	2.2	0
ARL6IP4	25032	1.49387	1.15814	1.92692	0.00199902	AD	2.2	2.1	3.2	0
MPI	31787	1.72331	1.2157	2.44288	0.00223501	AD	1.2	1.1	2.2	0
MADD	15718	0.796741	0.688534	0.921952	0.00227985	AD	25.3	25.2	26	0
ARHGAP26	73876	1.20621	1.06708	1.36348	0.00271525	AD	21.2	21.1	22	0
VPS29	24435	1.30539	1.09641	1.55421	0.00275305	AD	3.2	3.1	5	0
AFAP1L2	13199	0.789408	0.675904	0.921972	0.00282919	AD	18.2	18.1	19	0
KIF9	64505	1.37887	1.11636	1.70311	0.00286888	AD	2.2:2.3	2.1	4	0
IRF3	51002	1.50763	1.14912	1.97799	0.00304404	AD	1.5	1.4	2	0
HDGF	8323	1.21954	1.06638	1.39469	0.00374802	AD	1.2	1.1	4	0
TMEM177	55139	0.806496	0.697265	0.932837	0.00377608	AD	1.2	1.1	2.1	0
POLD3	17775	1.48139	1.13524	1.93307	0.00380227	AD	1.2	1.1	2	0
DAP3	8123	1.31687	1.09165	1.58855	0.00402371	AD	2.3	2.2	3	0
COA1	79339	1.16908	1.05103	1.3004	0.00402387	AD	3.2	3.1	4.2	0
ADPGK	31594	1.15798	1.04769	1.27989	0.00407645	AD	1.2:1.3	1.1	2	0
SPATA20	42428	1.09152	1.02786	1.15912	0.00428636	AD	4.3	4.2	6	0
CCDC14	66491	1.12837	1.03663	1.22822	0.00524596	AD	2.9	2.8	3	0
RPL35	87538	1.17156	1.04747	1.31034	0.00557213	AD	4.2	4.1	5	0
AKTIP	36419	1.37369	1.09677	1.72053	0.00570804	AD	1.2	1.1	3	0
AKT1S1	51113	1.21585	1.05738	1.39806	0.00608635	AD	1.2	1.1	3.2	0
YDJC	61233	1.37282	1.09444	1.72201	0.00613649	AD	2.2	2.1	3	0
AKT1S1	51111	0.776488	0.647245	0.931539	0.00646065	AD	1.3	1.2	3.2	0
ACOT2	28301	0.835337	0.733489	0.951327	0.00668553	AD	2.3	2.2	3	0
ATG4B	58398	1.19779	1.05127	1.36473	0.00670793	AD	14.2:14.3	14.1	15	0
TMEM170A	37613	1.18613	1.04728	1.3434	0.00720653	AD	5.3	5.2	6.1	0
METTL21A	57196	0.846889	0.749373	0.957094	0.00775465	AD	2.2	2.1	4.2	0
ATP5J	60270	1.12166	1.02906	1.22259	0.00900985	AD	1.3:1.4	1.2	3	0
LENG8	51902	1.23166	1.0522	1.44173	0.00950659	AD	1.2	1.1	2	0
IRF3	51023	1.08275	1.0193	1.15015	0.0098699	AD	1.2:1.3:1.4:1.5	1.1	2	0
ATP5J	60266	0.619744	0.430105	0.892997	0.0102521	AD	1.4:1.5	1.3	3	0
HARS2	73743	1.15445	1.03446	1.28837	0.010316	AD	6.2:6.3	6.1	7	0
RNPS1	33256	1.11242	1.02534	1.20689	0.0104159	AD	2.2:2.3	2.1	3	0
ALG3	67855	0.771537	0.631894	0.94204	0.0108942	AD	2.2	2.1	3	0
NPEPPS	42082	0.660968	0.480566	0.909092	0.0108957	AD	7.2	7.1	8	0
RAB15	27924	1.21536	1.04533	1.41305	0.0111953	AD	6.2:6.3	6.1	7	0
FDPS	8070	1.48401	1.09125	2.01814	0.0118463	AD	1.2	1.1	3.1	1
FXYD5	49081	1.93172	1.15481	3.23132	0.0121315	AD	1.2	1.1	1.6	0
MZF1	52490	1.19798	1.03979	1.38023	0.0124181	AD	1.2	1.1	3	0
BANF1	16983	1.97918	1.15771	3.38352	0.0125874	AD	1.2	1.1	3	0
METTL13	8998	1.68301	1.11734	2.53505	0.0127443	AD	1.2:1.3	1.1	2.1	0
HNRNPH3	11928	1.45026	1.08161	1.94456	0.0129831	AD	4.2	4.1	5	0
HHLA3	3405	1.16619	1.03184	1.31805	0.0138246	AD	1.3	1.2	3	0
METTL10	13408	1.22316	1.04188	1.43598	0.0138443	AD	3.2	3.1	4	0
PON2	80536	1.21793	1.03939	1.42712	0.0147803	AD	3.3	3.2	4	0
MAGIX	89090	1.12518	1.02322	1.23729	0.0149461	AD	2.2:2.3	2.1	3	0
HHLA3	3408	1.14905	1.02738	1.28513	0.014978	AD	1.2:1.3	1.1	3	0
HAUS4	26678	1.25673	1.04389	1.51296	0.015792	AD	1.3	1.2	2	0
METTL23	43650	0.885908	0.802635	0.97782	0.0161585	AD	1.2:1.3:1.4	1.1	3	0
SMIM12	1701	0.815545	0.689927	0.964034	0.0168873	AD	1.3	1.2	4.1	0
ZNF384	19927	0.860099	0.759967	0.973424	0.0170096	AD	1.2	1.1	2.2	0
UBE2I	33057	1.11263	1.01885	1.21506	0.0175253	AD	4.4	4.3	5.2	0
PARD3	11215	1.2541	1.03991	1.5124	0.0178123	AD	16.2	16.1	18	0
WDR26	9963	1.22004	1.03496	1.43821	0.0178195	AD	3.2	3.1	4.2	1
ZC3H11A	9461	1.13982	1.02255	1.27055	0.0181563	AD	2.2	2.1	3.2	0
MRPL52	26647	1.34757	1.05205	1.72611	0.018194	AD	1.2	1.1	1.4	0
MRPL55	10094	1.17415	1.02761	1.34158	0.0182544	AD	2.3:2.4:2.5:2.6	2.2	2.9	0
PSMA1	14475	2.11352	1.13496	3.93579	0.0183222	AD	3.2	3.1	5	0
PRMT5	26673	1.36264	1.05307	1.76322	0.0186105	AD	1.2	1.1	2	0
VWA9	31209	1.14557	1.0227	1.28321	0.0188907	AD	1.3	1.2	2.1	0
ATP5J	60274	1.1086	1.01682	1.20867	0.0193784	AD	1.2:1.3:1.4	1.1	3	0
BTD	63622	1.23081	1.03358	1.46568	0.0197759	AD	1.2	1.1	5	0
MDM1	22925	0.909449	0.839301	0.98546	0.0204706	AD	3.3:3.4	3.2	4	0
CDK11A	214	0.833619	0.714707	0.972316	0.0204767	AD	7.2	7.1	8	0
TBC1D7	75384	0.877801	0.785738	0.98065	0.0211316	AD	1.2	1.1	2.2	0
MRPL21	17344	1.56063	1.06754	2.28147	0.0216007	AD	2.2	2.1	3	0
SLC52A2	85575	0.807351	0.671653	0.970464	0.0226494	AD	1.4	1.3	2.2	0
DBNDD2	59545	1.1948	1.02463	1.39322	0.0231839	AD	1.2	1.1	3.3	0
LUC7L	32847	1.08543	1.01096	1.1654	0.0237927	AD	1.2:1.3:1.4	1.1	2.2	0
MRPL55	10077	1.4652	1.05175	2.04118	0.0239297	AD	2.6	2.5	2.9	0
TMEM230	58640	1.2665	1.03108	1.55568	0.0243461	AD	1.3	1.2	4	0
CCNL1	67385	1.16073	1.01864	1.32263	0.0252731	AD	4.2:4.3	4.1	5	0
EZH2	82163	1.34123	1.03493	1.73817	0.0264486	AD	5.2	5.1	7	0
MAPRE3	52921	1.20084	1.02138	1.41182	0.0266791	AD	5.2	5.1	6	0
TMEM5	22853	1.14821	1.016	1.29762	0.0268046	AD	1.2	1.1	2	0
CCNT2	55408	1.12268	1.01329	1.24388	0.0269367	AD	7.2	7.1	8	0
GOLGB1	66400	1.28288	1.0274	1.60188	0.0279078	AD	18.2	18.1	19	0
TJP1	29765	1.16483	1.01663	1.33464	0.0279826	AD	30.2	30.1	31	0
ZNF692	10558	0.725021	0.54373	0.966758	0.0285069	AD	5.2	5.1	6.1	0
STRA13	44264	1.29594	1.02661	1.63592	0.0291892	AD	3.2	3.1	4.1	0
HMGN3	76814	1.24992	1.02174	1.52906	0.0300752	AD	5.2	5.1	6	0
HMGA1	75774	1.12016	1.01056	1.24164	0.0307761	AD	1.2:1.3	1.1	3.1	0
PRMT2	60963	1.35693	1.02598	1.79463	0.0323705	AD	1.2:1.3	1.1	2	0
PCK2	26827	1.49838	1.03368	2.17198	0.0327729	AD	2.2:2.3	2.1	4	0
LIG1	50689	1.15226	1.01153	1.31256	0.0329644	AD	24.2	24.1	25	0
METTL23	43648	0.916254	0.845147	0.993344	0.0338385	AD	1.2:1.3:1.4:1.5	1.1	3	0
HMGB2	71176	0.503373	0.266542	0.950635	0.0343428	AD	1.2	1.1	2.2	0
MIF4GD	43416	1.55575	1.03296	2.34311	0.0344144	AD	6.2	6.1	7	0
PTPRE	13465	1.16972	1.01071	1.35374	0.0354798	AD	17.2	17.1	18	0
POLR2H	67946	1.8483	1.04211	3.27817	0.0356362	AD	2.2	2.1	3	0
FGFR1	83414	1.28767	1.01646	1.63124	0.0361489	AD	14.3	14.2	15	0
MADD	15719	0.868124	0.760509	0.990967	0.0362292	AD	25.2:25.3	25.1	26	0
NCOR2	25143	0.812271	0.668197	0.987411	0.0368755	AD	46.2	46.1	47	0
HEMK1	65089	0.873976	0.769964	0.992039	0.0371963	AD	1.2:1.3	1.1	2.1	0
SFSWAP	25216	0.828416	0.693161	0.990063	0.0384738	AD	2.2	2.1	3	0
ATG12	73039	1.34573	1.01559	1.78319	0.038669	AD	1.2	1.1	3	0
ANAPC13	66872	0.79853	0.645012	0.988587	0.0388913	AD	2.2:2.3	2.1	3	0
ABHD17A	46558	1.18472	1.00858	1.39164	0.0390225	AD	4.3	4.2	5.1	0
NPIPA5	34149	1.14445	1.0068	1.30092	0.0390523	AD	8.2:8.3	8.1	9	0
SH3YL1	52499	1.75129	1.0282	2.9829	0.0391769	AD	17.2	17.1	18	0
PLEKHH3	41103	0.860208	0.745384	0.992721	0.0394084	AD	11.2	11.1	12.2	0
NUDT16L1	33791	1.30848	1.0126	1.69083	0.0398137	AD	2.2	2.1	2.4	0
THUMPD3	63081	1.11374	1.00466	1.23466	0.0405269	AD	1.3	1.2	2	0
FAM214A	30696	1.15647	1.00618	1.32921	0.0406832	AD	12.2	12.1	13	0
FAM168B	55364	0.837452	0.706406	0.992809	0.0410438	AD	1.2	1.1	2	0
RPL21	25526	0.788427	0.627124	0.991219	0.0418019	AD	1.3	1.2	2	0
ABHD3	44778	1.16877	1.00565	1.35834	0.04201	AD	5.2	5.1	6	0
RB1CC1	83823	0.853351	0.732356	0.994336	0.0420761	AD	23.2	23.1	24	0
OSBPL3	79025	1.10851	1.00367	1.22431	0.0421306	AD	15.2	15.1	16	0
RPL21	25524	1.12778	1.00407	1.26673	0.0425029	AD	1.4	1.3	2	0
HEMK1	65085	1.11235	1.00332	1.23323	0.0430828	AD	1.4	1.3	2.1	0
IFI35	41177	0.772991	0.601961	0.992613	0.0435832	AD	4.2	4.1	5	0
HTATIP2	14712	0.881025	0.778504	0.997048	0.0447705	AD	1.3	1.2	1.5	0
UBL5	47437	1.76047	1.01286	3.05988	0.0449339	AD	1.3	1.2	2.1	0
ZC2HC1C	28481	1.09304	1.00188	1.19249	0.0452635	AD	2.2:2.3	2.1	3	0
LIN54	69760	0.915613	0.839886	0.998168	0.0453292	AD	3.2	3.1	4	0
ZNF720	36292	1.13529	1.00251	1.28565	0.0455579	AD	1.2	1.1	2	0
TRABD	62793	0.854669	0.732615	0.997058	0.0457782	AD	1.2	1.1	3.2	0
KRAS	20823	0.779643	0.610526	0.995604	0.0460124	AD	1.2	1.1	2	0
RNPS1	33252	0.467551	0.221329	0.987689	0.0463242	AD	5.3	5.2	6	0
POLR2J3	81114	1.28811	1.00373	1.65306	0.0466734	AD	4.4:4.5	4.3	8	0
TMEM177	55138	0.836726	0.701681	0.997763	0.0471553	AD	1.2:1.3	1.1	2.1	0
HTATIP2	14714	0.89074	0.794145	0.999085	0.0482001	AD	1.2:1.3	1.1	1.5	0
C4orf48	68544	1.06817	1.00032	1.14062	0.0488842	AD	1.2	1.1	2	0
ZC3HAV1	81941	1.1309	1.00043	1.27838	0.0491928	AD	4.2	4.1	5	0
METTL23	43641	1.14473	1.0004	1.30989	0.0493229	AD	1.4	1.3	3	0
RNF43	42674	0.812593	0.660668	0.999455	0.0493994	AD	1.2:1.3:1.4	1.1	3	0
RAMP1	58148	1.38609	1.18785	1.61741	3.3823e-05	AP	1	null	null	0
SORBS2	71374	0.857688	0.794178	0.926276	9.19108e-05	AP	3	null	null	0
UBE2E3	56407	1.69291	1.28715	2.22658	0.000166195	AP	3	null	null	0
SORBS2	71370	1.14438	1.06545	1.22915	0.000216656	AP	15	null	null	0
ANKRD54	62163	1.18058	1.08047	1.28998	0.0002409	AP	1	null	null	0
NT5DC2	65224	1.43375	1.17777	1.74536	0.00032995	AP	1.1	null	null	0
FDFT1	82641	0.696664	0.571402	0.849386	0.000351365	AP	2.1	null	null	0
RGS3	87287	1.46313	1.1848	1.80685	0.000407642	AP	13	null	null	0
UACA	31439	0.835281	0.755662	0.92329	0.000429088	AP	1	null	null	0
CREM	11231	1.31985	1.12928	1.54258	0.000486358	AP	13.1	null	null	0
MGAT1	75021	0.810838	0.72058	0.9124	0.000496667	AP	6	null	null	0
HEXB	72500	0.747856	0.634851	0.880975	0.000508688	AP	2	null	null	0
SOCS2	23705	1.21728	1.08912	1.36051	0.000531938	AP	1	null	null	0
UACA	31438	1.18806	1.07685	1.31075	0.000589426	AP	2	null	null	0
SNAP47	10056	0.745489	0.629286	0.88315	0.000680794	AP	2	null	null	0
TFEB	76118	1.4753	1.17873	1.84649	0.000683743	AP	4.1	null	null	0
SULT2B1	50774	1.16786	1.06705	1.2782	0.000754186	AP	2.1	null	null	0
LLGL2	43459	1.18748	1.07382	1.31316	0.00081512	AP	2	null	null	0
PIGQ	32900	0.792276	0.689007	0.911022	0.00108395	AP	3	null	null	0
FDFT1	82638	1.41322	1.14803	1.73965	0.00110645	AP	1	null	null	0
SLC44A2	47559	0.88219	0.81788	0.951557	0.0011715	AP	2	null	null	0
RGS3	87291	0.828619	0.739428	0.928567	0.00121441	AP	5	null	null	0
PMEPA1	59948	1.68687	1.22756	2.31804	0.001263	AP	1	null	null	0
RAMP1	58149	0.745886	0.623808	0.891854	0.00130419	AP	2	null	null	0
MTA2	16357	0.601546	0.441151	0.820256	0.00131711	AP	1	null	null	0
FAR1	14455	0.860713	0.78519	0.9435	0.00136858	AP	1	null	null	0
CELF1	15759	0.701417	0.564504	0.871536	0.00136966	AP	1	null	null	0
FAR1	14454	1.16177	1.0598	1.27356	0.00137899	AP	10.1	null	null	0
TAF9	72344	1.86022	1.26891	2.72706	0.00147159	AP	3.1	null	null	0
TRIM11	10206	1.26668	1.09446	1.46599	0.00152109	AP	2.1	null	null	0
TRIM11	10207	0.789469	0.682135	0.913693	0.00152144	AP	1	null	null	0
SOCS2	23707	0.869588	0.79741	0.9483	0.00157394	AP	3	null	null	0
HDHD3	87277	0.799981	0.696518	0.918814	0.00158729	AP	1	null	null	0
HDHD3	87276	1.25003	1.08836	1.43571	0.00158729	AP	2.1	null	null	0
MIB2	182	1.30146	1.10503	1.5328	0.00159729	AP	4	null	null	0
GFER	33179	0.834928	0.74554	0.935033	0.00179242	AP	1	null	null	0
GFER	33180	1.19768	1.06942	1.34132	0.00180094	AP	2.1	null	null	0
FBXO5	78211	0.850414	0.767982	0.941694	0.0018406	AP	2	null	null	0
CEPT1	4139	0.708575	0.570453	0.880141	0.00184539	AP	2	null	null	0
CEPT1	4140	1.40343	1.13367	1.73739	0.00185875	AP	1	null	null	0
RAB3IP	23345	0.76921	0.651533	0.908142	0.0019524	AP	1	null	null	0
RUFY3	69444	0.856856	0.776853	0.945097	0.00200762	AP	1	null	null	0
SRSF11	3370	0.733184	0.602106	0.892798	0.00201273	AP	1	null	null	0
FBXO5	78210	1.17379	1.06021	1.29954	0.00202906	AP	1	null	null	0
C12orf65	25060	0.831252	0.739055	0.93495	0.00206064	AP	1	null	null	0
UBE2E3	56408	0.707492	0.567692	0.88172	0.00206534	AP	2.1	null	null	0
CUL4A	26367	0.760935	0.639483	0.905454	0.00207394	AP	3	null	null	0
FPGS	87667	1.28071	1.09385	1.49949	0.00210641	AP	2	null	null	0
FPGS	87668	0.780817	0.666894	0.914201	0.00210651	AP	1	null	null	0
RUFY3	69445	1.15214	1.05213	1.26165	0.00223688	AP	2	null	null	0
TEX30	26213	0.809716	0.707178	0.92712	0.00224804	AP	1	null	null	0
HMGA1	75769	0.792334	0.682351	0.920044	0.00226626	AP	1.1	null	null	0
HMGA1	75770	1.26205	1.08684	1.46551	0.00227397	AP	2	null	null	0
NBPF1	831	1.17669	1.05957	1.30676	0.00235217	AP	3	null	null	0
FBXO7	61931	1.37928	1.12113	1.69687	0.00235525	AP	2	null	null	0
FBXO7	61930	0.725018	0.589321	0.891961	0.00235527	AP	1	null	null	0
MRPL48	17713	1.31072	1.10062	1.56092	0.00240044	AP	9	null	null	0
MRPL48	17714	0.76294	0.640649	0.908576	0.00240045	AP	1	null	null	0
C2orf81	54051	1.16868	1.05678	1.29243	0.00240162	AP	2.1	null	null	0
RNF19A	84704	1.12801	1.04359	1.21925	0.00240634	AP	2	null	null	0
NEK6	87526	0.829615	0.734945	0.93648	0.00251502	AP	2	null	null	0
SRSF11	3373	1.3371	1.10707	1.61493	0.00256138	AP	3.1	null	null	0
LIMS1	54885	0.835623	0.743427	0.939252	0.00260683	AP	1	null	null	0
WBP1L	12980	1.35385	1.11114	1.64957	0.00265176	AP	2	null	null	0
NCOA4	11536	0.69581	0.548859	0.882105	0.00273239	AP	1	null	null	0
GCA	55769	0.616499	0.448674	0.8471	0.00285007	AP	2	null	null	0
RAB3IP	23343	1.17625	1.05717	1.30874	0.00287407	AP	5.1	null	null	0
NREP	72970	1.20268	1.06506	1.35808	0.00291404	AP	7.1	null	null	0
TADA2B	68733	1.13069	1.04259	1.22624	0.00299975	AP	2.1	null	null	0
MRPL10	42098	0.68992	0.539703	0.881947	0.00304993	AP	1.1	null	null	0
MRPL10	42097	1.44944	1.13385	1.85286	0.00305042	AP	2.1	null	null	0
SYNJ2	78244	0.892931	0.828295	0.962611	0.00313743	AP	1	null	null	0
PDHX	14972	1.45962	1.13552	1.87622	0.00315687	AP	1	null	null	0
PDHX	14971	0.685117	0.532992	0.880662	0.00315757	AP	2	null	null	0
WBP1L	12981	0.741179	0.607403	0.904418	0.00318605	AP	1	null	null	0
NUP85	43383	1.1999	1.06293	1.35452	0.00321	AP	12	null	null	0
NUP85	43382	0.833404	0.738271	0.940796	0.00321058	AP	1	null	null	0
C19orf24	46447	0.793818	0.680451	0.926073	0.00331612	AP	1	null	null	0
C19orf24	46446	1.25972	1.07981	1.46959	0.00331799	AP	2	null	null	0
NR1H3	15695	1.15769	1.04927	1.27731	0.00351601	AP	3.1	null	null	0
RANBP1	61137	0.780935	0.661393	0.922084	0.00353529	AP	2	null	null	0
RANBP1	61136	1.28052	1.0845	1.51196	0.00353537	AP	1	null	null	0
CREM	11229	0.849262	0.760777	0.948038	0.00360834	AP	1	null	null	0
MICALL2	78571	1.21012	1.06407	1.37622	0.00365828	AP	2.1	null	null	0
RNF19A	84703	0.884542	0.814258	0.960892	0.00368008	AP	1	null	null	0
MTA2	16358	1.6942	1.18671	2.41871	0.00370335	AP	2	null	null	0
PDXK	60785	2.17614	1.28693	3.67977	0.00371772	AP	2	null	null	0
NFE2L2	56129	0.757924	0.628338	0.914234	0.00376438	AP	5	null	null	0
DGKZ	15540	0.834669	0.738507	0.943352	0.00380697	AP	3	null	null	0
RCAN1	60491	1.16332	1.04997	1.28891	0.0038265	AP	7.1	null	null	0
TADA2B	68732	0.885918	0.816072	0.961741	0.00384016	AP	1.1	null	null	0
STAMBPL1	12469	1.23222	1.06949	1.4197	0.00385707	AP	6.1	null	null	0
NBPF1	830	0.851011	0.762718	0.949524	0.00389272	AP	1	null	null	0
ADI1	52563	1.27479	1.08038	1.50418	0.00403077	AP	2	null	null	0
ADI1	52562	0.784443	0.664813	0.925599	0.00403077	AP	1	null	null	0
LIMS1	54884	1.34459	1.09877	1.64539	0.00404804	AP	6	null	null	0
DNASE1L1	90574	0.80376	0.692312	0.933149	0.00412439	AP	1	null	null	0
MICALL2	78570	0.827407	0.726876	0.941841	0.0041498	AP	1.1	null	null	0
ATP6V0A2	25112	0.855781	0.769052	0.952291	0.00428178	AP	1	null	null	0
LPAR2	48663	1.14176	1.04239	1.25061	0.00432409	AP	1	null	null	0
DYRK1B	49840	1.44498	1.12202	1.86089	0.00434421	AP	2	null	null	0
ZNF76	75897	1.4379	1.11946	1.84694	0.00446289	AP	1	null	null	0
SP140L	57884	1.11741	1.03508	1.20629	0.0044701	AP	3	null	null	0
TBC1D22A	62719	0.824098	0.721152	0.94174	0.00448853	AP	1	null	null	0
GGT1	61425	1.22098	1.06332	1.40202	0.00465109	AP	6.1	null	null	0
C1QTNF1	43983	1.11326	1.03335	1.19935	0.00475664	AP	5	null	null	0
CUL4A	26366	1.33003	1.09107	1.62132	0.00476473	AP	2	null	null	0
GPR35	58296	1.22305	1.0633	1.40681	0.00481234	AP	7.1	null	null	0
GPR35	58297	0.846164	0.753298	0.950479	0.00485872	AP	1	null	null	0
RNF4	68566	1.47844	1.12565	1.9418	0.00494095	AP	4	null	null	0
PFKFB2	9613	1.19566	1.05527	1.35472	0.00504536	AP	1	null	null	0
ATP6V0A2	25113	1.16454	1.04677	1.29557	0.00510844	AP	18.1	null	null	0
SQSTM1	74932	0.746633	0.608492	0.916134	0.00512446	AP	3	null	null	0
MFSD12	46692	0.885893	0.813745	0.964439	0.00518402	AP	4.1	null	null	0
MFSD12	46693	1.12876	1.0368	1.22888	0.00521448	AP	1	null	null	0
PDXK	60786	0.473813	0.280187	0.801246	0.00532565	AP	1	null	null	0
GDPD5	17859	1.15518	1.04364	1.27864	0.00536198	AP	11	null	null	0
C1orf198	10247	0.756076	0.620928	0.92064	0.00538724	AP	4.1	null	null	0
RNF4	68565	0.677095	0.514391	0.891264	0.00542068	AP	1.1	null	null	0
NFS1	59209	0.825478	0.720804	0.945352	0.00556645	AP	1.1	null	null	0
TMEM59	3108	1.30822	1.08185	1.58196	0.0055798	AP	4.1	null	null	0
AIFM1	90067	0.799004	0.681448	0.936839	0.00571897	AP	1	null	null	0
AIFM1	90068	1.25156	1.06742	1.46746	0.00571897	AP	11.1	null	null	0
SNAPC2	47196	0.884701	0.810977	0.965127	0.00578846	AP	1	null	null	0
ERF	50141	1.56531	1.13843	2.15224	0.00581556	AP	2	null	null	0
TMEM91	50045	0.881389	0.805716	0.964169	0.00583948	AP	4	null	null	0
ERF	50140	0.639091	0.464673	0.878979	0.00590107	AP	1	null	null	0
CCND3	76154	0.896945	0.830064	0.969215	0.00594423	AP	3.1	null	null	0
PIGQ	32898	1.2308	1.06144	1.42719	0.00597084	AP	1	null	null	0
HEXB	72498	1.36504	1.09313	1.70459	0.00603948	AP	1	null	null	0
MAZ	35938	1.22147	1.05888	1.40901	0.00605054	AP	4.1	null	null	0
EPB41L1	59268	0.868264	0.78493	0.960445	0.00607108	AP	2	null	null	0
TMEM91	50043	1.12777	1.03495	1.22891	0.00607302	AP	1	null	null	0
FBXL19	36201	0.898131	0.831697	0.969871	0.00614018	AP	2	null	null	0
CDK18	9548	1.29246	1.07548	1.55321	0.00621889	AP	2.1	null	null	0
GTF2H1	14601	1.15786	1.04234	1.28619	0.00627269	AP	9.1	null	null	0
DGKZ	15541	1.20494	1.05396	1.37755	0.0063448	AP	2	null	null	0
HEPH	89326	0.883872	0.808865	0.965833	0.00636586	AP	1	null	null	0
NR4A1	21887	1.19528	1.05149	1.35873	0.00637786	AP	2	null	null	0
CDK18	9549	0.774025	0.643834	0.930543	0.0064091	AP	1.1	null	null	0
TEX30	26215	1.28156	1.07219	1.53182	0.00641423	AP	3.1	null	null	0
NR4A1	21884	0.840395	0.741591	0.952363	0.00643356	AP	4.1	null	null	0
EPS15L1	48152	1.12635	1.03383	1.22715	0.0065115	AP	7.1	null	null	0
CLPTM1	50379	1.36623	1.09082	1.71117	0.00659216	AP	1.1	null	null	0
TBC1D22A	62720	1.19749	1.05139	1.36389	0.00663221	AP	2	null	null	0
SNAPC2	47195	1.1278	1.03398	1.23013	0.00664459	AP	2	null	null	0
MIB2	184	0.662937	0.492603	0.89217	0.00666813	AP	3.1	null	null	0
RER1	257	1.33245	1.08291	1.6395	0.00667185	AP	2.1	null	null	0
RER1	256	0.750513	0.609954	0.923462	0.00667705	AP	1	null	null	0
NUCB2	14520	0.809301	0.69421	0.943472	0.00686246	AP	6	null	null	0
NUCB2	14519	1.23563	1.05991	1.44049	0.00686319	AP	1	null	null	0
SYNJ2	78242	1.10721	1.02837	1.1921	0.00688936	AP	3	null	null	0
KIAA0930	62645	1.24804	1.0626	1.46585	0.00693834	AP	5.1	null	null	0
CLPTM1	50380	0.732916	0.584736	0.918648	0.00701247	AP	2	null	null	0
C19orf48	51221	0.779234	0.649976	0.934197	0.00702799	AP	1	null	null	0
C19orf48	51219	1.2833	1.07043	1.53851	0.00703008	AP	2	null	null	0
LEMD2	75767	1.10522	1.02764	1.18865	0.00705635	AP	2.1	null	null	0
MID1	88464	1.30395	1.075	1.58167	0.00705895	AP	4	null	null	0
LEMD2	75766	0.904982	0.841406	0.973362	0.00722137	AP	1.1	null	null	0
NFE2L2	56127	1.47701	1.11027	1.96488	0.00740006	AP	1	null	null	0
STAMBPL1	12468	0.856696	0.764871	0.959545	0.00749846	AP	1	null	null	0
UNC119	39913	1.23784	1.0584	1.44769	0.0075773	AP	2.1	null	null	0
UNC119	39914	0.807861	0.690756	0.94482	0.0075773	AP	1	null	null	0
ENOSF1	44459	1.17423	1.04357	1.32125	0.00761849	AP	11	null	null	0
C2orf81	54050	0.86436	0.776588	0.962051	0.00762827	AP	1	null	null	0
PKMYT1	33326	1.13008	1.03253	1.23684	0.00793013	AP	3	null	null	0
RPUSD1	33007	1.13454	1.03355	1.24539	0.00796038	AP	2.1	null	null	0
ENOSF1	44460	0.852167	0.757056	0.959228	0.00806462	AP	1.1	null	null	0
PFKFB2	9612	0.841244	0.740188	0.956097	0.00810787	AP	2	null	null	0
INPPL1	17588	1.16626	1.04057	1.30712	0.00820274	AP	2.1	null	null	0
TSEN34	51808	1.38674	1.08814	1.76728	0.00822412	AP	2	null	null	0
INPPL1	17589	0.857753	0.76529	0.961388	0.00837412	AP	1	null	null	0
LPAR2	48664	0.880989	0.801605	0.968235	0.00853907	AP	2.1	null	null	0
SLC9A3R2	33186	1.15057	1.03622	1.27755	0.00863681	AP	3	null	null	0
RPUSD1	33006	0.881767	0.80267	0.968658	0.00868961	AP	1	null	null	0
SH3PXD2A	13022	0.893246	0.820939	0.971923	0.00876221	AP	1	null	null	0
NCOA4	11537	1.40696	1.08955	1.81683	0.00885881	AP	3	null	null	0
WIBG	22288	1.32905	1.07378	1.64501	0.00894658	AP	3	null	null	0
CCND3	76156	1.11497	1.02756	1.20981	0.00898257	AP	2	null	null	0
AIDA	9892	1.48451	1.10349	1.99709	0.00903585	AP	1	null	null	0
AIDA	9891	0.673623	0.500729	0.906217	0.00903585	AP	2	null	null	0
CENPM	62467	0.762944	0.62259	0.934939	0.00909271	AP	1	null	null	0
KIAA0930	62646	0.806145	0.685512	0.948006	0.00917206	AP	1	null	null	0
PKMYT1	33325	0.887252	0.810868	0.970831	0.00920148	AP	1	null	null	0
PDP1	84544	1.32658	1.07226	1.64123	0.00925538	AP	2.1	null	null	0
UCHL5	9238	0.711135	0.550059	0.919378	0.00928373	AP	2	null	null	0
UCHL5	9237	1.4062	1.08769	1.81799	0.00928373	AP	1	null	null	0
COQ6	28338	0.726703	0.571309	0.924364	0.00930389	AP	2	null	null	0
UGT8	70428	1.27492	1.06145	1.53132	0.00938025	AP	2.1	null	null	0
UGT8	70429	0.784364	0.653034	0.942104	0.00938062	AP	1	null	null	0
PTOV1	51094	1.24247	1.05469	1.46368	0.00940694	AP	1	null	null	0
PTOV1	51095	0.804863	0.683216	0.948169	0.00941587	AP	2	null	null	0
DYRK1B	49841	0.710578	0.548736	0.920154	0.00957007	AP	1	null	null	0
LRRC49	31445	1.20389	1.04615	1.3854	0.00960716	AP	1	null	null	0
ABHD17A	46553	1.10626	1.02479	1.1942	0.0096714	AP	2.1	null	null	0
ABHD17A	46554	0.903951	0.837382	0.975811	0.00967146	AP	1	null	null	0
TPRA1	66607	0.883676	0.804626	0.970494	0.00969978	AP	2.1	null	null	0
NR2F2	32594	1.49213	1.10171	2.02091	0.00971475	AP	1	null	null	0
ANKRD13D	17156	1.14898	1.03404	1.27669	0.00981263	AP	11.1	null	null	0
PPM1N	50473	1.22641	1.05029	1.43207	0.00987152	AP	3.1	null	null	0
PTPRE	13458	0.898582	0.828445	0.974656	0.00990672	AP	1	null	null	0
ATAD3A	175	1.23999	1.05287	1.46037	0.00996031	AP	2	null	null	0
METTL21B	22750	1.33512	1.07139	1.66378	0.010049	AP	1	null	null	0
BCKDHA	50063	0.873105	0.787367	0.968179	0.0100769	AP	2.1	null	null	0
HBS1L	77783	1.14865	1.03357	1.27653	0.0100829	AP	6	null	null	0
HBS1L	77782	0.870593	0.783373	0.967524	0.0100839	AP	1	null	null	0
ANKRD13D	17155	0.870551	0.783183	0.967665	0.010196	AP	1	null	null	0
EPS15L1	48151	0.877337	0.793954	0.969478	0.0102193	AP	1	null	null	0
SFR1	13036	1.15975	1.03567	1.29869	0.0102551	AP	3.1	null	null	0
2018-09-09	43716	0.843842	0.741233	0.960655	0.010265	AP	1	null	null	0
MAZ	35937	0.831218	0.721718	0.957332	0.010318	AP	2.1	null	null	0
TSKU	17902	1.11025	1.02496	1.20264	0.0103321	AP	2	null	null	0
NME4	32875	0.836082	0.729103	0.958758	0.0103805	AP	2	null	null	0
HOMEZ	26723	1.25035	1.05387	1.48346	0.0104222	AP	1	null	null	0
DDHD2	83376	1.13691	1.03046	1.25436	0.0105237	AP	11.1	null	null	0
DDHD2	83377	0.878798	0.795833	0.970413	0.0106625	AP	1	null	null	0
BCKDHA	50062	1.14438	1.03184	1.2692	0.010666	AP	1	null	null	0
PFKM	21414	0.743015	0.591498	0.933344	0.010686	AP	5	null	null	0
FBXO3	14920	0.705421	0.539576	0.922241	0.0107124	AP	1	null	null	0
ATAD3A	174	0.807555	0.68511	0.951883	0.0108418	AP	1	null	null	0
HARS	73719	0.849264	0.748805	0.9632	0.0109688	AP	1	null	null	0
HARS	73720	1.17748	1.0382	1.33545	0.0109698	AP	3.1	null	null	0
C11orf48	16385	1.63389	1.11917	2.38532	0.0109848	AP	1.1	null	null	0
C11orf48	16384	0.612048	0.41924	0.893528	0.0109867	AP	3	null	null	0
FBXL19	36199	1.11346	1.02487	1.20972	0.0110632	AP	1	null	null	0
B4GALT2	2514	1.09071	1.01999	1.16635	0.0111331	AP	2.1	null	null	0
CNOT3	51796	0.798141	0.67058	0.949966	0.0111594	AP	1	null	null	0
CNOT3	51795	1.2529	1.05266	1.49123	0.0111637	AP	2.1	null	null	0
NEK3	25986	0.859559	0.764695	0.966192	0.0112004	AP	1	null	null	0
SPOP	42302	0.877859	0.793688	0.970957	0.0113069	AP	1	null	null	0
TSKU	17903	0.90133	0.831679	0.976814	0.011352	AP	1	null	null	0
SPOP	42303	1.13908	1.02984	1.25992	0.0113576	AP	4	null	null	0
TBC1D10A	61715	0.854852	0.756994	0.965361	0.0114618	AP	1	null	null	0
MGAT1	75018	1.40983	1.08022	1.84	0.0114745	AP	1	null	null	0
SMG1	34272	0.862597	0.769092	0.967469	0.011573	AP	1	null	null	0
ZNF276	38137	0.830494	0.718749	0.959612	0.0117649	AP	3	null	null	0
TNKS	82594	1.10363	1.0221	1.19168	0.0118012	AP	2	null	null	0
SMG1	34273	1.1586	1.03295	1.29952	0.0119517	AP	2	null	null	0
HAUS8	48222	1.18417	1.03771	1.35131	0.0120926	AP	2.1	null	null	0
CAB39	57908	0.832245	0.721018	0.96063	0.0121175	AP	1	null	null	0
PDP1	84543	0.757228	0.609334	0.94102	0.012132	AP	1.1	null	null	0
TNKS	82595	0.906288	0.839142	0.978806	0.0122307	AP	1.1	null	null	0
ULK3	31751	1.20241	1.04093	1.38893	0.0122372	AP	2.1	null	null	0
B4GALT2	2515	0.918116	0.858664	0.981683	0.0123773	AP	1	null	null	0
RAB11FIP1	83362	1.07475	1.0157	1.13722	0.0124045	AP	2.1	null	null	0
CTDNEP1	38876	1.38085	1.07215	1.77844	0.0124347	AP	1	null	null	0
TRIM73	80111	1.27071	1.0529	1.53356	0.0125122	AP	2	null	null	0
LIMS1	54881	1.31675	1.06086	1.63435	0.0125655	AP	2	null	null	0
CAB39	57909	1.20098	1.04009	1.38675	0.0125713	AP	2.1	null	null	0
C12orf36	92954	1.2803	1.05416	1.55494	0.0127068	AP	1	null	null	0
ESYT2	82534	0.911289	0.846977	0.980485	0.0128551	AP	1	null	null	0
ESYT2	82535	1.09735	1.0199	1.18067	0.0128554	AP	16.1	null	null	0
FAM3D	65466	0.891545	0.814431	0.975961	0.0128776	AP	1	null	null	0
FAM3D	65467	1.12165	1.02463	1.22785	0.0128785	AP	2	null	null	0
DCAKD	41928	1.19651	1.03857	1.37847	0.0129962	AP	2	null	null	0
RAB11FIP1	83363	0.930789	0.87954	0.985025	0.0130592	AP	1.1	null	null	0
EHBP1L1	16876	1.12875	1.02573	1.24212	0.0131306	AP	17.1	null	null	0
EHBP1L1	16875	0.885934	0.805074	0.974916	0.0131307	AP	1	null	null	0
NPEPPS	42074	1.14062	1.02787	1.26575	0.0132306	AP	11.1	null	null	0
SOX30	74391	1.08015	1.01589	1.14847	0.0137509	AP	3	null	null	0
LIMA1	21691	0.890465	0.811922	0.976606	0.0138007	AP	1	null	null	0
SOX30	74390	0.925932	0.870916	0.984423	0.0138054	AP	1	null	null	0
CENPK	72211	1.19067	1.03591	1.36856	0.0140276	AP	3.1	null	null	0
SLC9A3R2	33187	0.879277	0.793485	0.974345	0.0140444	AP	1	null	null	0
DDX55	25083	0.843838	0.736722	0.966528	0.0142258	AP	1	null	null	0
DDX55	25084	1.18506	1.03463	1.35736	0.0142264	AP	12.1	null	null	0
PPM1N	50469	0.879779	0.794088	0.974717	0.0142955	AP	2	null	null	0
METRN	32961	0.917531	0.856462	0.982954	0.0143169	AP	1	null	null	0
ZNF76	75898	0.741331	0.583388	0.942034	0.0143473	AP	2	null	null	0
NEMF	27445	1.09422	1.01803	1.1761	0.0144706	AP	26	null	null	0
TAF9	72345	0.706011	0.534105	0.933247	0.0144766	AP	2	null	null	0
ETFB	51319	0.813346	0.689177	0.959887	0.0145118	AP	1	null	null	0
ETFB	51320	1.22949	1.04179	1.45101	0.0145118	AP	2.1	null	null	0
ARHGAP27	41957	0.884594	0.801678	0.976086	0.0146071	AP	6	null	null	0
POM121	79925	0.799105	0.667447	0.956734	0.0146271	AP	1	null	null	0
NAAA	69559	0.83903	0.728641	0.966143	0.0147477	AP	1	null	null	0
MOK	29361	1.11358	1.0213	1.21419	0.0147874	AP	12	null	null	0
TBC1D9B	74988	1.14423	1.02669	1.27523	0.0148422	AP	15	null	null	0
POM121	79926	1.25093	1.04471	1.49787	0.0148597	AP	5	null	null	0
NAAA	69560	1.19155	1.03464	1.37226	0.014987	AP	2.1	null	null	0
SLC5A6	52948	1.18297	1.03313	1.35455	0.0150342	AP	2	null	null	0
C12orf36	92955	0.786381	0.647789	0.954625	0.0151235	AP	2	null	null	0
ZNF398	82169	1.08948	1.01669	1.16748	0.0151345	AP	1	null	null	0
TBC1D9B	74987	0.874265	0.784319	0.974526	0.0152743	AP	1	null	null	0
SLC35A5	66110	1.21242	1.03756	1.41674	0.0153502	AP	3	null	null	0
ARAP1	17637	1.29889	1.05122	1.60492	0.0154061	AP	8.1	null	null	0
ZNF783	82179	1.17926	1.03182	1.34777	0.0155337	AP	5	null	null	0
HMGN1	60607	0.845639	0.738232	0.968672	0.0155534	AP	2	null	null	0
CENPL	9023	1.22927	1.03986	1.45318	0.0156172	AP	2.1	null	null	0
NPEPPS	42075	0.878314	0.790572	0.975794	0.0156794	AP	2.1	null	null	0
MTFR1L	1196	1.21353	1.0372	1.41985	0.0156982	AP	4.1	null	null	0
MAF1	85532	0.699944	0.523955	0.935044	0.0157564	AP	1	null	null	0
MAF1	85533	1.42869	1.06947	1.90856	0.0157564	AP	2	null	null	0
STK25	58384	0.885325	0.801864	0.977472	0.0159092	AP	2.1	null	null	0
WARS	29272	1.22547	1.03859	1.44598	0.0160194	AP	2.1	null	null	0
SLC15A4	25186	0.911191	0.844765	0.982841	0.016035	AP	1	null	null	0
SREBF1	39501	1.14136	1.02489	1.27106	0.0160521	AP	3.1	null	null	0
SREBF1	39500	0.876158	0.786751	0.975727	0.0160658	AP	1	null	null	0
WARS	29273	0.816085	0.691606	0.962968	0.0160907	AP	1	null	null	0
DNASE1L1	90575	1.14343	1.02493	1.27564	0.0163465	AP	3.1	null	null	0
TPRA1	66605	1.13334	1.02319	1.25536	0.0164244	AP	1	null	null	0
WIBG	22287	0.769068	0.620496	0.953215	0.0165097	AP	2	null	null	0
SLC48A1	21358	0.848513	0.741878	0.970475	0.0165151	AP	5.1	null	null	0
UVRAG	17880	0.919337	0.858218	0.984809	0.0165713	AP	1	null	null	0
ACIN1	26702	0.844969	0.735956	0.97013	0.0168369	AP	9.1	null	null	0
ACIN1	26701	1.18348	1.03079	1.35879	0.0168376	AP	1	null	null	0
MCCC1	67769	0.874642	0.78361	0.976248	0.0169096	AP	2	null	null	0
ULK3	31750	0.836319	0.722191	0.968483	0.0169513	AP	1	null	null	0
HGSNAT	83760	1.38786	1.06036	1.81649	0.0169963	AP	12	null	null	0
MFSD10	68612	0.798199	0.663277	0.960566	0.0170411	AP	1	null	null	0
MFSD10	68613	1.25276	1.04099	1.5076	0.0170722	AP	2.1	null	null	0
ELF4	90065	1.14908	1.02506	1.2881	0.0170885	AP	1	null	null	0
OGFR	60083	1.24137	1.03921	1.48287	0.0171252	AP	2.1	null	null	0
OGFR	60084	0.80556	0.674369	0.962273	0.0171262	AP	1	null	null	0
NEMF	27444	0.915173	0.850663	0.984575	0.0174644	AP	1	null	null	0
CDK10	38109	1.3156	1.04901	1.64994	0.0175922	AP	1	null	null	0
CDK10	38108	0.760121	0.606096	0.953287	0.0175944	AP	2.1	null	null	0
EPS8L2	13727	1.21871	1.03505	1.43496	0.0176279	AP	2.1	null	null	0
HOMEZ	26724	0.808162	0.677659	0.963796	0.0177715	AP	3	null	null	0
HGSNAT	83759	0.722546	0.552017	0.945756	0.017981	AP	1	null	null	0
SLC35A5	66109	0.827242	0.70689	0.968084	0.0180627	AP	1	null	null	0
EPS8L2	13729	0.821325	0.697341	0.967352	0.0183977	AP	1	null	null	0
MAFK	78581	1.11559	1.0186	1.22181	0.0184167	AP	2	null	null	0
C1QTNF1	43985	0.889517	0.806962	0.980518	0.0184803	AP	2.1	null	null	0
MAFK	78580	0.896452	0.818451	0.981887	0.0185965	AP	1	null	null	0
NME4	32874	1.22311	1.03423	1.44648	0.0186109	AP	3.1	null	null	0
TMEM59	3111	0.850502	0.743055	0.973485	0.0187762	AP	1.1	null	null	0
IGJ	69441	0.603507	0.396027	0.919688	0.0188	AP	1	null	null	0
TBC1D10A	61714	1.15873	1.02446	1.3106	0.0190516	AP	3	null	null	0
TRMU	62704	1.16852	1.02586	1.33101	0.0190599	AP	2	null	null	0
MPST	62072	1.10226	1.01605	1.19579	0.0191172	AP	2.1	null	null	0
MPST	62071	0.907289	0.836271	0.984339	0.0193086	AP	1.1	null	null	0
ZMYND11	10582	1.35264	1.05003	1.74245	0.019396	AP	1	null	null	0
CENPM	62468	1.31823	1.04527	1.66248	0.0195966	AP	2.1	null	null	0
SPG21	31148	0.908735	0.838504	0.984848	0.0197011	AP	1	null	null	0
EPB41L1	59266	1.18791	1.02784	1.3729	0.0197087	AP	5	null	null	0
TCF3	46533	1.14368	1.02148	1.2805	0.0198845	AP	2.1	null	null	0
HMGN1	60609	1.17278	1.02539	1.34135	0.020025	AP	8.1	null	null	0
MCM7	80880	1.16453	1.02423	1.32405	0.0200439	AP	2	null	null	0
MCM7	80881	0.858713	0.755257	0.976341	0.0200442	AP	1	null	null	0
CMC2	37702	0.77583	0.626337	0.961003	0.0201146	AP	2	null	null	0
RNF44	74656	1.16802	1.02441	1.33176	0.0203229	AP	1	null	null	0
ZNF792	49006	1.12582	1.01854	1.2444	0.0203685	AP	3.1	null	null	0
TCEB1	84198	1.28379	1.03932	1.58578	0.0204638	AP	2	null	null	0
RNF44	74655	0.856483	0.75108	0.976677	0.0207674	AP	2	null	null	0
ARHGEF16	308	1.12293	1.01777	1.23895	0.0208289	AP	4.1	null	null	0
PODNL1	47947	1.07983	1.0117	1.15254	0.0209058	AP	2	null	null	0
MNX1	82500	1.14318	1.02033	1.28081	0.0210601	AP	2.1	null	null	0
MNX1	82501	0.874757	0.780754	0.980078	0.0210606	AP	1	null	null	0
SPG21	31149	1.10026	1.01434	1.19346	0.0212614	AP	4.1	null	null	0
SLC25A19	43430	1.19766	1.02709	1.39655	0.0213966	AP	4.1	null	null	0
PPP1R12A	23526	1.2326	1.0311	1.47348	0.0216612	AP	1	null	null	0
ZNF580	52121	1.08419	1.01182	1.16172	0.0218183	AP	2.1	null	null	0
TRMU	62705	0.85807	0.752739	0.97814	0.0219791	AP	1	null	null	0
ARHGEF16	307	0.919408	0.855623	0.987948	0.0219933	AP	1	null	null	0
ZNF580	52122	0.922498	0.860944	0.988453	0.0220443	AP	1	null	null	0
SYK	86818	0.899968	0.82219	0.985104	0.0222893	AP	1	null	null	0
SLC25A19	43428	0.835568	0.716251	0.974761	0.022305	AP	1	null	null	0
PLEC	85513	0.683049	0.492425	0.947467	0.0224194	AP	5	null	null	0
DBNDD2	59535	1.22081	1.02856	1.44899	0.0224829	AP	3.1	null	null	0
TCF3	46532	0.876427	0.782542	0.981576	0.0225109	AP	1	null	null	0
TCEB1	84196	0.781554	0.632411	0.96587	0.0225247	AP	1.1	null	null	0
COQ6	28340	1.34928	1.04222	1.7468	0.0229739	AP	1	null	null	0
LRRC32	17898	1.12759	1.01665	1.25063	0.023061	AP	2	null	null	0
CGGBP1	65666	0.757543	0.596183	0.962576	0.0230826	AP	3	null	null	0
ALDH6A1	28367	1.08991	1.01189	1.17395	0.0231006	AP	7.1	null	null	0
CDYL	75229	1.13545	1.01752	1.26706	0.0231858	AP	5	null	null	0
NFKBIZ	65982	1.13617	1.01759	1.26856	0.0232105	AP	1	null	null	0
CMC2	37703	1.27247	1.03332	1.56696	0.0232968	AP	1	null	null	0
TMEM9B	14285	1.26914	1.0328	1.55958	0.0233959	AP	1	null	null	0
TMEM9B	14286	0.787932	0.6412	0.968243	0.0233959	AP	2	null	null	0
GTF2H1	14599	0.902035	0.825028	0.986229	0.023542	AP	1	null	null	0
PSME3	41143	1.19613	1.0243	1.39678	0.0236068	AP	1	null	null	0
PSME3	41144	0.83603	0.715933	0.976273	0.023608	AP	4	null	null	0
CENPK	72209	0.849077	0.736858	0.978386	0.0236921	AP	1	null	null	0
MCCC1	67770	1.13918	1.01749	1.27541	0.0237706	AP	1	null	null	0
ADCK3	10035	0.819908	0.690213	0.973973	0.0238124	AP	7	null	null	0
ADCK3	10036	1.21964	1.02672	1.44882	0.0238174	AP	1	null	null	0
CCDC124	48386	1.21714	1.02626	1.44353	0.023958	AP	2	null	null	0
CCDC124	48385	0.821596	0.692746	0.974412	0.0239593	AP	1	null	null	0
WAC	11098	0.793261	0.648643	0.970121	0.0241109	AP	2	null	null	0
FAM195B	44165	0.774075	0.619599	0.967064	0.0241429	AP	1	null	null	0
PDE4DIP	4408	0.927641	0.868993	0.990247	0.0241902	AP	13.1	null	null	0
KAT5	16911	0.848085	0.734821	0.978806	0.0242691	AP	1.1	null	null	0
NUDT6	70521	0.874238	0.77766	0.98281	0.0244318	AP	2.1	null	null	0
CLPP	47023	1.44512	1.04856	1.99165	0.024467	AP	2.1	null	null	0
CLPP	47024	0.691987	0.502097	0.953691	0.0244692	AP	1	null	null	0
CGREF1	52930	0.921409	0.857894	0.989627	0.0246983	AP	1.1	null	null	0
DBNDD1	38196	1.08286	1.01017	1.16079	0.0247545	AP	3.1	null	null	0
VGLL4	63393	0.863972	0.760402	0.981648	0.0248155	AP	1	null	null	0
SH3YL1	52495	1.22215	1.02566	1.45629	0.0248785	AP	6	null	null	0
RBFOX2	61982	1.12599	1.01495	1.24919	0.0250875	AP	3	null	null	0
CHTOP	7742	1.35331	1.03834	1.76383	0.0252026	AP	3.1	null	null	0
CHTOP	7743	0.738933	0.566952	0.963083	0.0252052	AP	1	null	null	0
SPATA13	25474	0.877305	0.782285	0.983865	0.0252158	AP	4	null	null	0
LIMK2	61834	1.13056	1.0153	1.25891	0.0253016	AP	3	null	null	0
CD63	22245	3.50116	1.16756	10.4989	0.0253221	AP	3.1	null	null	0
SP140L	57885	0.904514	0.82833	0.987703	0.0253793	AP	1	null	null	0
CDK16	88910	0.886729	0.797889	0.985461	0.0256233	AP	2	null	null	0
SH3BP2	68593	1.21116	1.02361	1.43309	0.0256306	AP	5	null	null	0
ODF2	87750	0.81469	0.680486	0.97536	0.0256398	AP	1	null	null	0
KAT5	16912	1.17791	1.02005	1.36019	0.025722	AP	2.1	null	null	0
SLC48A1	21359	1.16682	1.0188	1.33633	0.0258075	AP	1	null	null	0
CBFA2T2	58986	1.24904	1.02709	1.51894	0.0258947	AP	4	null	null	0
RBFOX2	61979	0.888636	0.800914	0.985964	0.0259794	AP	1	null	null	0
ZNF721	68347	1.24402	1.02636	1.50784	0.0260752	AP	1	null	null	0
C14orf80	29660	1.23078	1.02494	1.47794	0.0261603	AP	1	null	null	0
KXD1	48453	0.861572	0.755537	0.982487	0.0261724	AP	1.1	null	null	0
LIMK2	61833	0.885001	0.794604	0.985682	0.0262627	AP	1	null	null	0
SC5D	19179	1.18918	1.02065	1.38553	0.0262807	AP	2	null	null	0
LIMA1	21689	1.2311	1.02469	1.47909	0.026392	AP	7.1	null	null	0
IGJ	69442	1.61118	1.05752	2.45472	0.0263981	AP	2.1	null	null	0
MED24	40828	1.21141	1.02258	1.4351	0.0265406	AP	2.1	null	null	0
HNRNPL	49697	0.877707	0.782053	0.98506	0.0267158	AP	2	null	null	0
HNRNPL	49698	1.13933	1.01516	1.27867	0.0267189	AP	1	null	null	0
ARHGAP27	41959	1.20773	1.02193	1.4273	0.0267928	AP	1	null	null	0
PRR19	50149	1.13829	1.01488	1.27669	0.0269485	AP	2.1	null	null	0
UGDH	69065	0.731693	0.55477	0.965039	0.0269706	AP	2	null	null	0
PPP1R12A	23528	0.831063	0.705299	0.979253	0.0270781	AP	2.1	null	null	0
ACOX3	68765	1.19322	1.02019	1.39559	0.0271001	AP	1	null	null	0
TUBGCP2	13529	0.865099	0.760566	0.983998	0.0274214	AP	2	null	null	0
MED7	74317	1.135	1.0142	1.2702	0.0274223	AP	2	null	null	0
ZNF721	68348	0.804818	0.663272	0.976571	0.0277937	AP	2	null	null	0
HNRNPF	11324	1.68174	1.05815	2.67285	0.0278741	AP	4	null	null	0
C1orf198	10248	1.29878	1.02877	1.63967	0.0279153	AP	2	null	null	0
ODF2	87749	1.21936	1.02137	1.45573	0.0282431	AP	2	null	null	0
CGREF1	52931	1.08055	1.00829	1.15799	0.0282628	AP	2.1	null	null	0
ASNS	80560	0.728435	0.548812	0.966847	0.0282826	AP	1	null	null	0
TRIB3	58449	1.32283	1.03002	1.69888	0.0284029	AP	2	null	null	0
TRIB3	58448	0.755955	0.588623	0.970856	0.0284039	AP	1	null	null	0
SMARCA4	47608	1.14011	1.01394	1.28198	0.0284325	AP	2	null	null	0
HAUS8	48223	0.857801	0.747784	0.984005	0.0285086	AP	1	null	null	0
ILVBL	48055	0.783229	0.629258	0.974875	0.0286827	AP	1	null	null	0
MGAT1	75022	1.156	1.01516	1.31638	0.028751	AP	5	null	null	0
GTF2IRD1	80080	1.13716	1.01334	1.2761	0.0288647	AP	2	null	null	0
ILVBL	48054	1.27644	1.02534	1.58902	0.0289688	AP	2	null	null	0
TBCB	49347	0.64072	0.429679	0.955416	0.028985	AP	1	null	null	0
TBCB	49348	1.56074	1.04666	2.32731	0.0289862	AP	2.1	null	null	0
CAPN2	9924	1.28615	1.02596	1.61231	0.0290915	AP	1	null	null	0
CAPN2	9923	0.777535	0.620242	0.974717	0.0291071	AP	2	null	null	0
ATP2C1	66756	1.12633	1.01215	1.25338	0.0291548	AP	1	null	null	0
PAM16	33648	0.871106	0.769476	0.986159	0.0292444	AP	2.1	null	null	0
SQSTM1	74933	1.31342	1.02792	1.67822	0.0292445	AP	1	null	null	0
DBNDD1	38197	0.917123	0.848475	0.991324	0.0292965	AP	2	null	null	0
PLEKHG6	19820	1.12005	1.01147	1.24028	0.0293205	AP	17	null	null	0
ZFYVE28	68556	0.925953	0.863972	0.99238	0.0295283	AP	1	null	null	0
GLS	56586	0.865338	0.759451	0.985988	0.0298666	AP	1	null	null	0
THAP5	81416	1.17301	1.01564	1.35476	0.0299248	AP	2	null	null	0
ELF4	90066	0.87876	0.781773	0.987779	0.0303086	AP	2	null	null	0
TEX30	26214	1.3077	1.02559	1.6674	0.0304841	AP	2	null	null	0
RPS6KA1	1280	0.893058	0.806032	0.989482	0.0306103	AP	1	null	null	0
ST20	32163	1.42424	1.03349	1.96274	0.0306731	AP	3.1	null	null	0
SLC15A4	25185	1.11099	1.00985	1.22226	0.0306731	AP	3.1	null	null	0
DCAKD	41927	0.879581	0.782964	0.98812	0.030674	AP	1	null	null	0
CDYL	75231	0.88369	0.789861	0.988665	0.0308491	AP	4	null	null	0
ASNS	80559	1.367	1.02923	1.81562	0.0308537	AP	2.1	null	null	0
DPP8	31167	1.15056	1.01289	1.30693	0.0310084	AP	2.1	null	null	0
FADS2	16289	1.11146	1.00967	1.22351	0.0310576	AP	2.1	null	null	0
TSPAN14	12366	0.878855	0.781512	0.988324	0.0310788	AP	1	null	null	0
THAP5	81417	0.853072	0.738306	0.985678	0.0311109	AP	1	null	null	0
ADAP1	78554	1.24593	1.0201	1.52176	0.0311603	AP	1	null	null	0
UVRAG	17878	1.07125	1.00623	1.14048	0.0312215	AP	10	null	null	0
ST3GAL4	19395	0.889614	0.799794	0.989521	0.0312438	AP	5.1	null	null	0
ADCY6	21464	1.17372	1.01449	1.35793	0.0312861	AP	2.1	null	null	0
CABIN1	61387	0.888317	0.79754	0.989425	0.0312981	AP	2	null	null	0
TMEM176B	82257	1.41862	1.03147	1.95109	0.0315144	AP	4.1	null	null	0
TSPAN14	12367	1.13651	1.01123	1.27731	0.0317685	AP	2	null	null	0
IL11RA	86208	1.06595	1.00554	1.12998	0.0319101	AP	2	null	null	0
OPA3	50487	1.3755	1.02748	1.8414	0.0321866	AP	1	null	null	0
TAF6	80896	0.881468	0.785337	0.989366	0.0322406	AP	2.1	null	null	0
C14orf79	29585	1.20642	1.016	1.43254	0.0322716	AP	3.1	null	null	0
C14orf79	29587	0.828897	0.698061	0.984256	0.0322721	AP	1	null	null	0
PDE4DIP	4407	1.077	1.00625	1.15271	0.0323796	AP	3	null	null	0
GTF2IRD1	80081	0.880834	0.784144	0.989447	0.0324526	AP	1	null	null	0
C17orf62	44336	1.2225	1.01682	1.46979	0.032567	AP	3.1	null	null	0
CEBPG	48938	1.1578	1.01217	1.32437	0.0326463	AP	2	null	null	0
CEBPG	48937	0.863711	0.755077	0.987973	0.0326478	AP	1	null	null	0
GGPS1	10344	0.749698	0.575474	0.976668	0.0327678	AP	3	null	null	0
SLC12A8	66544	1.13552	1.01038	1.27616	0.0329058	AP	1	null	null	0
TSPAN4	13790	1.14666	1.01117	1.3003	0.0329198	AP	3	null	null	0
KIAA1217	10993	1.22905	1.01653	1.486	0.0332342	AP	9	null	null	0
MAP7D1	1756	1.12788	1.00958	1.26004	0.0332904	AP	9	null	null	0
MBD3	46524	1.14305	1.01063	1.29283	0.0333084	AP	1.1	null	null	0
SMAD4	45557	0.916932	0.846331	0.993422	0.0338866	AP	4	null	null	0
ETV4	41709	0.893534	0.805195	0.991565	0.034053	AP	1	null	null	0
PIGX	68256	1.12288	1.00867	1.25003	0.0342038	AP	2	null	null	0
MED7	74316	0.884665	0.789765	0.990968	0.0342874	AP	1	null	null	0
SLC25A29	29250	0.892067	0.802522	0.991602	0.0343263	AP	1	null	null	0
TUBGCP2	13530	1.18557	1.01265	1.38803	0.0343299	AP	11.1	null	null	0
ANKLE2	25295	0.900347	0.81684	0.992391	0.0345349	AP	1.1	null	null	0
PIGX	68255	0.890767	0.800126	0.991676	0.0346326	AP	1	null	null	0
RREB1	75250	1.29803	1.01889	1.65364	0.0347331	AP	1	null	null	0
ANKLE2	25296	1.11061	1.00755	1.22421	0.0347402	AP	11.1	null	null	0
PTCH1	86956	0.782562	0.623229	0.982629	0.0347867	AP	2	null	null	0
SLC25A29	29249	1.12077	1.00806	1.24609	0.0349959	AP	3.1	null	null	0
SEC14L1	43705	1.15061	1.00988	1.31096	0.0350626	AP	7	null	null	0
LRRC49	31447	0.859162	0.746036	0.989442	0.0350905	AP	3	null	null	0
DBNDD2	59536	0.893284	0.804197	0.992239	0.0352635	AP	1.1	null	null	0
TRABD	62789	1.15284	1.00986	1.31607	0.03528	AP	2	null	null	0
SMARCA4	47607	0.880281	0.781648	0.99136	0.0354589	AP	1	null	null	0
SMAD4	45559	1.0968	1.00626	1.19549	0.035567	AP	1	null	null	0
HEPH	89328	1.10181	1.00649	1.20615	0.035717	AP	2	null	null	0
TAOK3	24699	1.1348	1.00847	1.27695	0.0357299	AP	21.1	null	null	0
OPA3	50486	0.730085	0.544282	0.979317	0.0357784	AP	2	null	null	0
SATB2	56718	0.781698	0.621089	0.98384	0.0358345	AP	2	null	null	0
SYTL2	18142	1.14532	1.00895	1.30013	0.0359353	AP	10.1	null	null	0
SHF	30409	0.918916	0.849092	0.994481	0.0359741	AP	3	null	null	0
MED24	40830	0.831414	0.699594	0.988071	0.0360632	AP	1	null	null	0
LZTS2	12861	0.908696	0.830858	0.993827	0.0361286	AP	1	null	null	0
NEK6	87524	1.18359	1.01093	1.38574	0.0361611	AP	3	null	null	0
LZTS2	12860	1.10045	1.00617	1.20357	0.0362158	AP	2.1	null	null	0
RANGAP1	62416	1.33386	1.0186	1.7467	0.0362703	AP	4.1	null	null	0
ZFYVE28	68557	1.06692	1.00412	1.13364	0.0363696	AP	2	null	null	0
SYK	86820	1.09958	1.00601	1.20184	0.0364272	AP	2	null	null	0
DUT	30485	0.858422	0.743999	0.990443	0.0364807	AP	3.1	null	null	0
OXR1	84842	0.86934	0.762418	0.991258	0.0365192	AP	6.1	null	null	0
KIF23	31389	1.09901	1.00585	1.20079	0.0367031	AP	7	null	null	0
COL18A1	60875	1.06013	1.0036	1.11985	0.0367604	AP	3.1	null	null	0
BCL2L14	20494	1.16926	1.00959	1.35418	0.0368579	AP	5	null	null	0
PTPRE	13457	1.08251	1.00476	1.16628	0.0370951	AP	6	null	null	0
UBE2E1	63715	1.1194	1.00676	1.24463	0.037113	AP	3	null	null	0
PICK1	62187	1.30203	1.01582	1.66888	0.0371672	AP	2.1	null	null	0
DUSP10	9881	1.14756	1.00819	1.3062	0.0372174	AP	3	null	null	0
BCL2L14	20493	0.855434	0.73854	0.990831	0.0372667	AP	4	null	null	0
PLEKHS1	13172	1.24593	1.01276	1.53278	0.0375322	AP	3	null	null	0
C12orf65	25059	1.16789	1.00894	1.35188	0.0376042	AP	3.1	null	null	0
RNPS1	33248	0.773982	0.60787	0.985487	0.0376569	AP	2.1	null	null	0
RNPS1	33245	1.29202	1.01473	1.64509	0.0376569	AP	1.1	null	null	0
UBE2E1	63714	0.893686	0.803732	0.993707	0.0378394	AP	1	null	null	0
NPLOC4	44131	1.18328	1.00936	1.38718	0.0380003	AP	16.1	null	null	0
GGPS1	10346	1.32816	1.01562	1.73688	0.0381515	AP	4	null	null	0
FBXO3	14922	1.41561	1.01917	1.96628	0.0381532	AP	2.1	null	null	0
SAR1B	73415	0.891125	0.798974	0.993906	0.0384778	AP	2	null	null	0
WRAP53	39042	1.15655	1.00769	1.3274	0.0385505	AP	1	null	null	0
EIF5A	38908	0.783349	0.621536	0.987289	0.0386095	AP	3	null	null	0
PLEKHS1	13173	0.80306	0.652288	0.988681	0.0387095	AP	1	null	null	0
TTYH3	78631	0.836015	0.705439	0.99076	0.038725	AP	1	null	null	0
PFKM	21416	1.29429	1.0134	1.65304	0.0387737	AP	1	null	null	0
TRABD	62790	0.878946	0.777683	0.993395	0.0388207	AP	1.1	null	null	0
SHC1	7855	1.11057	1.00538	1.22677	0.0388544	AP	2.1	null	null	0
SHC1	7854	0.900439	0.815153	0.994649	0.038862	AP	1	null	null	0
NFKBIZ	65981	0.889078	0.795229	0.994004	0.0388631	AP	3	null	null	0
NEK3	25988	1.14	1.00661	1.29107	0.0390489	AP	3.1	null	null	0
SUPT4H1	42661	1.25126	1.01131	1.54816	0.0390693	AP	1	null	null	0
MRPL51	19869	0.668429	0.455909	0.980016	0.0390782	AP	2	null	null	0
MRPL51	19868	1.49604	1.02039	2.19342	0.0390782	AP	1	null	null	0
STK25	58383	1.12477	1.00584	1.25777	0.0392033	AP	1	null	null	0
SATB2	56715	1.0724	1.00343	1.14612	0.0393039	AP	4	null	null	0
LRRC32	17897	0.894072	0.803753	0.994541	0.0393304	AP	1	null	null	0
TTYH3	78630	1.19556	1.00869	1.41706	0.0394256	AP	5.1	null	null	0
ZNF398	82171	0.924162	0.857331	0.996202	0.0394628	AP	3	null	null	0
PLEKHG6	19821	0.895037	0.805212	0.994881	0.0398724	AP	2	null	null	0
KCTD6	65458	1.12075	1.00527	1.2495	0.0398997	AP	3.1	null	null	0
TNFSF13	38969	1.12498	1.00539	1.25879	0.0399985	AP	1	null	null	0
TNFSF13	38970	0.888905	0.794413	0.994637	0.0400001	AP	2.1	null	null	0
PDCD10	67548	1.82583	1.02781	3.24344	0.0400201	AP	1.1	null	null	0
DUT	30484	1.1593	1.00655	1.33523	0.0403123	AP	2.1	null	null	0
BRF1	29605	1.11591	1.00485	1.23926	0.0403302	AP	13.1	null	null	0
ICA1	78783	1.37993	1.01417	1.8776	0.0404099	AP	3	null	null	0
WAC	11099	1.258	1.01002	1.56686	0.0404613	AP	1	null	null	0
CHTF8	37257	1.12895	1.00528	1.26784	0.0404716	AP	2	null	null	0
WRAP53	39043	0.865693	0.753985	0.993951	0.040752	AP	2.1	null	null	0
SHMT2	22539	0.752674	0.573136	0.988453	0.0410031	AP	1	null	null	0
MBD3	46523	0.879165	0.776862	0.994941	0.0413192	AP	2.1	null	null	0
HMGB3	90363	0.742528	0.557848	0.988348	0.0413211	AP	1	null	null	0
FOXK1	78641	1.07672	1.0029	1.15596	0.0413594	AP	1	null	null	0
GLS	56588	1.16209	1.00564	1.34287	0.0417292	AP	12.1	null	null	0
SC5D	19180	0.849889	0.726677	0.993992	0.0418137	AP	1	null	null	0
C5orf30	72919	1.19633	1.00662	1.42178	0.0418623	AP	2	null	null	0
DPP8	31168	0.873933	0.767323	0.995354	0.0423448	AP	1	null	null	0
CHTF8	37256	0.886526	0.78909	0.995994	0.0426073	AP	1	null	null	0
FOXK1	78642	0.928976	0.865114	0.997552	0.0426199	AP	5	null	null	0
TOB1	42491	0.727869	0.535285	0.989742	0.0427932	AP	3	null	null	0
TOB1	42490	1.37387	1.01036	1.86817	0.0427939	AP	1	null	null	0
DPEP1	38099	0.924237	0.856312	0.99755	0.0430781	AP	3.1	null	null	0
PLEKHG3	27902	0.905034	0.821535	0.99702	0.0433434	AP	1	null	null	0
SAR1B	73412	1.1079	1.00301	1.22376	0.0434661	AP	7.1	null	null	0
NCOA6	59035	1.07146	1.002	1.14573	0.0435477	AP	2	null	null	0
PICK1	62188	0.780882	0.614029	0.993074	0.0437338	AP	1.1	null	null	0
NOL6	86115	1.24677	1.00617	1.54491	0.0437834	AP	21.1	null	null	0
GPR35	58298	1.60079	1.01298	2.52971	0.0438843	AP	6	null	null	0
NPLOC4	44130	0.848041	0.722417	0.995512	0.0439092	AP	1	null	null	0
NOL6	86114	0.802137	0.647185	0.994189	0.0440955	AP	1	null	null	0
ZNF558	47261	0.872946	0.764726	0.996482	0.0442035	AP	1	null	null	0
HMGB3	90364	1.34269	1.00748	1.78943	0.044344	AP	2	null	null	0
PDXP	62142	0.867456	0.755163	0.996446	0.0444	AP	1	null	null	0
ARHGEF39	86268	1.14673	1.00338	1.31054	0.044479	AP	1	null	null	0
ARHGEF39	86269	0.872057	0.763049	0.996637	0.0444931	AP	3	null	null	0
CLEC2B	20282	1.10891	1.00253	1.22657	0.0445337	AP	4.1	null	null	0
FGFR1	83408	1.18564	1.00415	1.39993	0.0445518	AP	2	null	null	0
NFKB1	70110	0.911675	0.83285	0.99796	0.0450456	AP	1	null	null	0
PXN	24743	1.12528	1.00259	1.26299	0.0450772	AP	10	null	null	0
TRIM73	80112	0.820677	0.676172	0.996064	0.0455138	AP	1	null	null	0
PPP2R4	87834	1.3537	1.00592	1.82173	0.0456183	AP	14.1	null	null	0
NPDC1	88260	1.10642	1.00188	1.22187	0.045821	AP	2.1	null	null	0
NPDC1	88261	0.903817	0.81842	0.998124	0.0458211	AP	1	null	null	0
RUVBL1	66637	0.581443	0.341404	0.990253	0.0459319	AP	1	null	null	0
RUVBL1	66638	1.71961	1.00973	2.92857	0.0459764	AP	2	null	null	0
KLC2	16988	0.905627	0.821541	0.99832	0.046175	AP	2	null	null	0
PDXP	62143	1.1516	1.00229	1.32316	0.0463463	AP	2	null	null	0
PLEKHG3	27901	1.10361	1.00155	1.21607	0.0464509	AP	15.1	null	null	0
RBM4B	17105	1.29762	1.00405	1.67703	0.0464971	AP	2.1	null	null	0
CCDC64B	33363	1.35266	1.00457	1.82137	0.0465931	AP	2.1	null	null	0
DAG1	64873	0.908414	0.826335	0.998645	0.0468088	AP	2.1	null	null	0
DAG1	64874	1.10079	1.0013	1.21015	0.046938	AP	1	null	null	0
CALD1	81858	1.14852	1.00184	1.31668	0.0469961	AP	5	null	null	0
PKIG	59473	0.881424	0.778192	0.99835	0.0470393	AP	1	null	null	0
AACS	25170	1.21304	1.00251	1.46778	0.0470675	AP	13.1	null	null	0
OSER1	59459	1.34638	1.00356	1.80631	0.0472903	AP	2	null	null	0
OSER1	59460	0.74273	0.553613	0.996449	0.0472903	AP	1	null	null	0
RPL26L1	74569	0.786401	0.62016	0.997205	0.0473605	AP	3.1	null	null	0
C17orf62	44335	0.879208	0.774157	0.998515	0.047383	AP	1.1	null	null	0
MLXIP	24922	1.22347	1.00233	1.49339	0.047386	AP	9.1	null	null	0
MLXIP	24923	0.817363	0.669624	0.997698	0.0474095	AP	1	null	null	0
INPP5F	13270	1.09022	1.00096	1.18744	0.0474927	AP	16	null	null	0
HNRNPF	11325	0.843341	0.712419	0.998321	0.0477618	AP	3	null	null	0
SH3YL1	52493	0.911839	0.831872	0.999494	0.0487489	AP	3	null	null	0
C17orf70	44128	1.10004	1.00051	1.20949	0.0487892	AP	5.1	null	null	0
C17orf70	44127	0.909056	0.8268	0.999496	0.0487949	AP	1	null	null	0
ING2	71272	1.14974	1.00061	1.3211	0.0490099	AP	2	null	null	0
ING2	71271	0.869779	0.756958	0.999416	0.0490444	AP	1	null	null	0
CABIN1	61388	1.13434	1.00037	1.28625	0.0493293	AP	1	null	null	0
SCRN2	42116	1.2226	1.00059	1.49388	0.0493293	AP	2.1	null	null	0
ARAP1	17640	0.921819	0.8499	0.999824	0.0495057	AP	5	null	null	0
ALG3	67850	1.33603	1.00035	1.78435	0.049727	AP	1.1	null	null	0
ALG3	67851	0.748488	0.560427	0.999656	0.0497286	AP	2.1	null	null	0
RNF166	38014	0.898276	0.806952	0.999936	0.0498625	AP	1.1	null	null	0
EXOSC3	86445	1.29626	1.14483	1.46772	4.24296e-05	AT	5	null	null	0
TMEM177	55136	0.611601	0.47765	0.783118	9.68784e-05	AT	2.2	null	null	0
ENTPD5	28354	1.51196	1.22397	1.8677	0.000125803	AT	18	null	null	0
COL6A2	60896	1.89319	1.35429	2.64651	0.000188125	AT	28.2	null	null	0
ACOT11	3146	0.736509	0.626846	0.865357	0.000200782	AT	16	null	null	0
PKN2	3699	0.651919	0.517871	0.820666	0.000269758	AT	22	null	null	0
IMPA2	44660	2.04824	1.39245	3.01288	0.000271206	AT	8	null	null	0
SUMF1	62984	2.57473	1.54286	4.29669	0.00029502	AT	14	null	null	0
SLC35A2	89035	2.2182	1.42807	3.44549	0.000391362	AT	6	null	null	0
GINS4	83515	0.799804	0.706305	0.905681	0.000428591	AT	6.3	null	null	0
ARHGEF3	65366	0.681213	0.549752	0.844112	0.000449575	AT	20	null	null	0
POLR1C	76302	1.46038	1.17958	1.80801	0.000509103	AT	10	null	null	0
XYLB	64043	1.67918	1.25179	2.25248	0.000543226	AT	3	null	null	0
ABCB9	24999	1.26225	1.10418	1.44295	0.000645581	AT	13.2	null	null	0
VTI1A	13116	1.89284	1.3049	2.74569	0.00077303	AT	8	null	null	0
FGFR2	13296	1.12776	1.05099	1.21014	0.000830102	AT	26	null	null	0
ZNF765	51718	0.766796	0.655814	0.89656	0.000872247	AT	4	null	null	0
MCF2L	26328	1.56215	1.19976	2.034	0.000925176	AT	3	null	null	0
ENSA	7495	1.91588	1.29861	2.82655	0.00104967	AT	7	null	null	0
NUDT5	10768	0.620179	0.465937	0.82548	0.00105848	AT	11	null	null	0
NUDT5	10767	2.27423	1.38371	3.73787	0.00119092	AT	9.5	null	null	0
MCF2L	26326	0.723273	0.594222	0.880351	0.00123436	AT	41.5	null	null	0
NMNAT1	589	1.33788	1.11858	1.60019	0.00143874	AT	5	null	null	0
NMNAT1	590	0.747451	0.624929	0.893993	0.0014389	AT	6.3	null	null	0
SERAC1	78254	1.24567	1.08767	1.42662	0.00150232	AT	8.2	null	null	0
SPEF2	71767	0.824719	0.731544	0.929763	0.00162959	AT	11.2	null	null	0
NFS1	59214	0.788193	0.679044	0.914886	0.00175015	AT	16	null	null	0
NFS1	59212	1.26872	1.09303	1.47266	0.00175019	AT	6	null	null	0
NDUFS2	8596	0.635374	0.477745	0.84501	0.00182355	AT	14.3	null	null	0
NDUFS2	8595	1.57388	1.18342	2.09317	0.00182355	AT	10.2	null	null	0
ZNF7	85658	1.61705	1.19517	2.18786	0.0018342	AT	7	null	null	0
SEC14L2	61736	1.26246	1.08885	1.46373	0.00201636	AT	11.2	null	null	0
SEC14L2	61738	0.792113	0.683188	0.918404	0.00201725	AT	12	null	null	0
UHRF1BP1	75791	1.41931	1.13543	1.77417	0.00210154	AT	23	null	null	0
UHRF1BP1	75792	0.704592	0.563672	0.880743	0.00210253	AT	21	null	null	0
FANCD2	63305	2.32322	1.35191	3.9924	0.0022775	AT	44.2	null	null	0
CXCL12	11343	1.16535	1.05622	1.28575	0.00228626	AT	3.3	null	null	0
C19orf55	49287	0.657548	0.501951	0.861377	0.00234127	AT	10	null	null	0
C19orf55	49288	1.5208	1.16093	1.99223	0.00234127	AT	5.3	null	null	0
LRRFIP1	58131	0.717305	0.578791	0.888968	0.00240474	AT	21	null	null	0
LRRFIP1	58130	1.3941	1.1249	1.72774	0.00240497	AT	26	null	null	0
ESCO2	83185	0.808217	0.70428	0.927493	0.00243191	AT	11.2	null	null	0
ESCO2	83184	1.23729	1.07817	1.41989	0.00243211	AT	14	null	null	0
ZNF215	14188	1.1328	1.04496	1.22803	0.00246381	AT	8	null	null	0
FLAD1	7864	1.7306	1.21339	2.46825	0.00246414	AT	4.4	null	null	0
EIF2B1	25098	1.60289	1.18069	2.17607	0.00248778	AT	5.4	null	null	0
EIF2B1	25097	0.623874	0.459545	0.846967	0.00248788	AT	8	null	null	0
LGALS8	10380	1.65203	1.19326	2.28719	0.00249061	AT	10.2	null	null	0
LGALS8	10381	0.605314	0.437217	0.83804	0.00249065	AT	14	null	null	0
ZNF215	14189	0.882779	0.814254	0.95707	0.00249217	AT	7.2	null	null	0
UBE3D	76841	0.596328	0.425461	0.835816	0.00268987	AT	12	null	null	0
UBE3D	76842	1.67687	1.19639	2.35033	0.00269201	AT	7.2	null	null	0
MUM1	46452	0.556027	0.378973	0.815801	0.00269247	AT	15	null	null	0
MUM1	46451	1.79847	1.22579	2.63871	0.00269247	AT	13.4	null	null	0
USP4	64850	0.642082	0.479927	0.859026	0.00285306	AT	24	null	null	0
LCLAT1	53116	0.703789	0.558585	0.886739	0.00288679	AT	9	null	null	0
LCLAT1	53115	1.42088	1.12773	1.79024	0.00288679	AT	8	null	null	0
FGFR2	13300	0.881452	0.811068	0.957944	0.00295962	AT	28.2	null	null	0
TTLL5	28520	1.99901	1.26584	3.15683	0.00296654	AT	5.2	null	null	0
ABCB9	24998	0.822998	0.723108	0.936686	0.00317067	AT	14.2	null	null	0
FANCD2	63307	0.672319	0.516018	0.875964	0.00327211	AT	45	null	null	0
SERAC1	78255	0.813687	0.709135	0.933654	0.00330013	AT	19	null	null	0
TTLL5	28518	0.597528	0.42375	0.842571	0.0033149	AT	36	null	null	0
2018-09-11	69616	0.607093	0.434839	0.847582	0.00337636	AT	12.3	null	null	0
ESR2	27869	1.18955	1.05858	1.33671	0.0035392	AT	15.3	null	null	0
DIS3L2	57980	0.766083	0.640394	0.916441	0.00356508	AT	24.4	null	null	0
IPO11	72190	1.5827	1.16174	2.1562	0.00361195	AT	32	null	null	0
IPO11	72191	0.631833	0.463779	0.860783	0.0036122	AT	35	null	null	0
SLC35A2	89034	0.529942	0.345103	0.813782	0.00371307	AT	5.3	null	null	0
SLC35D1	3346	1.57123	1.15759	2.13267	0.00374599	AT	12	null	null	0
SLC35D1	3347	0.63645	0.4689	0.863868	0.0037466	AT	13	null	null	0
KDM2B	24877	1.45928	1.12904	1.88613	0.00388893	AT	15.2	null	null	0
INADL	3239	0.801983	0.690194	0.931878	0.0039623	AT	47.3	null	null	0
PHF6	90148	0.382523	0.198687	0.736454	0.00403697	AT	10.3	null	null	0
NFX1	86102	2.28519	1.30028	4.01616	0.00407047	AT	22.2	null	null	0
ZNF233	50310	1.30537	1.08816	1.56593	0.00410649	AT	6	null	null	0
PDE4DIP	4410	1.30975	1.08901	1.57525	0.00416497	AT	11.2	null	null	0
TMEM138	16187	1.46964	1.12889	1.91323	0.00422574	AT	3.5	null	null	0
TMEM138	16186	0.680455	0.522689	0.885841	0.00422753	AT	4	null	null	0
OXNAD1	63637	1.49418	1.13473	1.9675	0.0042335	AT	12	null	null	0
SSR1	75254	0.571763	0.389765	0.838744	0.00424399	AT	11.2	null	null	0
KDM2B	24876	0.68613	0.529487	0.889114	0.00438814	AT	26.4	null	null	0
SLC35B3	75286	0.721546	0.575624	0.90446	0.00463965	AT	12	null	null	0
ZNF614	51396	0.86501	0.782311	0.956451	0.00467811	AT	6.2	null	null	0
ZNF614	51397	1.15606	1.04553	1.27826	0.00467817	AT	7	null	null	0
ZNF7	85657	0.679607	0.519805	0.888535	0.00474196	AT	8.2	null	null	0
SLC6A9	2538	1.50304	1.13237	1.99503	0.00479635	AT	17	null	null	0
SLC6A9	2536	0.665343	0.501245	0.883163	0.00480518	AT	16	null	null	0
DDX19B	37347	0.783685	0.661071	0.929042	0.00498822	AT	15	null	null	0
DDX19B	37343	1.27602	1.07638	1.5127	0.00498839	AT	8	null	null	0
C8orf44	84029	1.15875	1.04547	1.28431	0.0049981	AT	5	null	null	0
SLC25A26	65543	0.773337	0.646064	0.925681	0.0050833	AT	13.4	null	null	0
SLC25A26	65542	1.2931	1.08028	1.54783	0.00508356	AT	15	null	null	0
ZNF233	50311	0.769049	0.63996	0.924178	0.00509402	AT	7.2	null	null	0
HIF3A	50554	1.14843	1.04201	1.26573	0.00528229	AT	18	null	null	0
C8orf44	84028	0.863426	0.778774	0.957279	0.00528284	AT	6	null	null	0
ZFP64	59813	0.659097	0.491414	0.883999	0.00538403	AT	6	null	null	0
AIG1	77972	0.771872	0.643073	0.926468	0.00543695	AT	10	null	null	0
DLD	81377	1.43086	1.10983	1.84475	0.00571175	AT	16	null	null	0
DLD	81376	0.698872	0.542068	0.901034	0.00571217	AT	15.2	null	null	0
KIF20B	12497	1.1403	1.0388	1.25172	0.00577684	AT	30	null	null	0
KIF20B	12498	0.876965	0.798902	0.962655	0.00577816	AT	34	null	null	0
C15orf57	29987	1.66745	1.15953	2.39787	0.00580631	AT	6	null	null	0
ZNF430	48742	1.26081	1.06824	1.4881	0.00613289	AT	5	null	null	0
UQCC1	59085	0.735971	0.591065	0.916404	0.00613834	AT	13	null	null	0
INADL	3238	1.29771	1.07699	1.56366	0.00614944	AT	38.2	null	null	0
TMUB2	41787	1.34564	1.08724	1.66545	0.00635575	AT	4.9	null	null	0
TMUB2	41786	0.74314	0.600438	0.919757	0.00635589	AT	5	null	null	0
RPL34	70300	0.901382	0.836546	0.971243	0.00640886	AT	8	null	null	0
RPL34	70298	1.10941	1.02961	1.19539	0.00640889	AT	7	null	null	0
RELL1	69002	0.820351	0.711158	0.946309	0.00658353	AT	7	null	null	0
RELL1	69003	1.21899	1.05674	1.40616	0.00658372	AT	8	null	null	0
HERC4	11914	0.662911	0.492563	0.892172	0.00667056	AT	28	null	null	0
HERC4	11913	1.50849	1.12085	2.03019	0.00667153	AT	4	null	null	0
MOK	29371	0.770478	0.638166	0.930223	0.00668014	AT	17.4	null	null	0
MOK	29368	1.2979	1.07501	1.56699	0.00668014	AT	19	null	null	0
DBF4B	41884	0.779648	0.651057	0.933637	0.00679679	AT	13.2	null	null	0
DBF4B	41883	1.28263	1.07108	1.53596	0.00679679	AT	14.3	null	null	0
UGGT2	26130	1.2647	1.06654	1.49967	0.00691584	AT	8	null	null	0
OGDH	79544	0.605965	0.421259	0.871657	0.00692474	AT	25	null	null	0
OGDH	79543	1.65024	1.14722	2.37382	0.00692631	AT	11.2	null	null	0
VPS53	38218	0.843396	0.745211	0.954516	0.0069941	AT	23.2	null	null	0
VPS53	38219	1.18568	1.04765	1.3419	0.0069941	AT	20.2	null	null	0
FAM98B	29919	0.63123	0.451403	0.882694	0.00715986	AT	8	null	null	0
FAM98B	29920	1.5842	1.13288	2.21531	0.00716137	AT	7.2	null	null	0
FHIT	65490	1.48665	1.11272	1.98624	0.00730684	AT	9.2	null	null	0
FNDC5	1641	1.09639	1.02508	1.17266	0.00732019	AT	6.2	null	null	0
LMBR1	82468	1.74564	1.16164	2.62324	0.00734074	AT	6	null	null	0
LMBR1	82466	0.572858	0.381208	0.860857	0.00734111	AT	21	null	null	0
PDE4DIP	4411	0.82144	0.711338	0.948583	0.00738703	AT	29.2	null	null	0
ABCB8	82287	0.820112	0.709273	0.948271	0.00743001	AT	11.2	null	null	0
ABCB8	82288	1.21933	1.05454	1.40988	0.00743319	AT	18	null	null	0
ZNF124	10514	1.44145	1.10222	1.88508	0.00756514	AT	5	null	null	0
CCDC66	65343	0.839934	0.738515	0.955281	0.00788923	AT	24	null	null	0
CCDC144A	39440	0.771449	0.63699	0.934289	0.00791784	AT	28	null	null	0
NXPE2	18845	1.13098	1.03264	1.23868	0.0080003	AT	7	null	null	0
DHDDS	1274	1.40901	1.09349	1.81557	0.00802672	AT	7	null	null	0
SETD9	72116	0.761649	0.622728	0.93156	0.00804974	AT	6	null	null	0
SETD9	72115	1.31294	1.07347	1.60584	0.00804997	AT	7	null	null	0
TMEM39B	1545	0.612051	0.425607	0.88017	0.00808337	AT	10	null	null	0
TMEM39B	1543	1.63375	1.13607	2.34944	0.00809135	AT	9.2	null	null	0
FHIT	65491	0.676061	0.505446	0.904266	0.00833668	AT	10.2	null	null	0
VRK3	51146	1.38809	1.08787	1.77116	0.00835734	AT	13.2	null	null	0
NUDT5	10766	2.08059	1.2062	3.58881	0.00843928	AT	10	null	null	0
ZNF684	2008	1.19697	1.04667	1.36885	0.00863214	AT	5.2	null	null	0
ZNF684	2009	0.835468	0.730539	0.95547	0.00866005	AT	6	null	null	0
CTNS	38472	1.42617	1.09409	1.85904	0.00866863	AT	6	null	null	0
CTNS	38471	0.701182	0.537914	0.914005	0.00866894	AT	13.3	null	null	0
ZNF283	50248	0.82532	0.71507	0.952567	0.00868558	AT	10	null	null	0
DUSP11	53982	0.512177	0.310546	0.844723	0.0087674	AT	10	null	null	0
DUSP11	53983	1.9524	1.18379	3.22004	0.00876999	AT	6	null	null	0
UQCC1	59083	1.43636	1.09544	1.88339	0.00881	AT	10.2	null	null	0
TTC9C	16414	1.49382	1.10628	2.01712	0.00881674	AT	3.2	null	null	0
TTC9C	16415	0.669459	0.495787	0.903968	0.00882251	AT	4	null	null	0
NFATC3	37183	0.499197	0.296627	0.840105	0.00889676	AT	13	null	null	0
CCDC132	80455	0.668207	0.493999	0.903849	0.00889892	AT	30	null	null	0
ZNF283	50247	1.28891	1.06564	1.55896	0.00892333	AT	9	null	null	0
MAGT1	89535	0.607999	0.418628	0.883035	0.00896853	AT	11	null	null	0
MAGT1	89536	1.64469	1.13244	2.38866	0.00897037	AT	4	null	null	0
NXPE2	18846	0.885003	0.807489	0.969957	0.00899563	AT	6	null	null	0
GTF2H1	14603	0.563331	0.366029	0.866986	0.00908588	AT	16	null	null	0
GTF2H1	14602	1.77514	1.15341	2.73202	0.00908735	AT	10.2	null	null	0
SIMC1	74635	1.14985	1.03515	1.27726	0.0092044	AT	7	null	null	0
SIMC1	74636	0.869676	0.782924	0.966041	0.00920506	AT	14.3	null	null	0
MESDC2	32193	1.38795	1.08388	1.77733	0.00936744	AT	6	null	null	0
MESDC2	32191	0.720488	0.562642	0.922615	0.00936751	AT	3.2	null	null	0
MED23	77614	0.812778	0.69498	0.950543	0.00946223	AT	32	null	null	0
HGSNAT	83763	0.689111	0.519751	0.913657	0.00966875	AT	20	null	null	0
HGSNAT	83762	1.45108	1.09446	1.92391	0.00967642	AT	10.2	null	null	0
SGCD	74304	1.11742	1.02724	1.21552	0.00970772	AT	12.2	null	null	0
SGCD	74302	0.895021	0.822756	0.973633	0.00982157	AT	13	null	null	0
COA5	54639	0.673364	0.498708	0.909187	0.0098398	AT	4	null	null	0
COA5	54638	1.48502	1.09984	2.0051	0.0098464	AT	3	null	null	0
ZNF430	48741	0.826072	0.714192	0.955479	0.0100728	AT	6	null	null	0
OBSCN	10196	0.927152	0.875167	0.982225	0.0101953	AT	118	null	null	0
OBSCN	10197	1.07857	1.01809	1.14265	0.0102033	AT	92	null	null	0
TAB3	88751	0.61437	0.42354	0.891181	0.010257	AT	12	null	null	0
TAB3	88752	1.62758	1.12203	2.36091	0.0102674	AT	10	null	null	0
RPGRIP1L	36421	0.797762	0.671164	0.948239	0.0103828	AT	28	null	null	0
HNF1A	24784	1.39342	1.0798	1.79814	0.010769	AT	6.6	null	null	0
HNF1A	24782	0.717665	0.556137	0.926107	0.0107716	AT	8	null	null	0
CCDC144A	39439	1.43952	1.08795	1.9047	0.0107725	AT	19.2	null	null	0
SUPT3H	76393	1.14447	1.03166	1.26961	0.0108145	AT	15	null	null	0
PSPC1	25403	1.30402	1.06319	1.59939	0.010828	AT	11	null	null	0
SUPT3H	76394	0.873781	0.787646	0.969334	0.010829	AT	14.3	null	null	0
PLEKHA5	20647	1.55212	1.10595	2.17829	0.0110105	AT	35	null	null	0
ZFP64	59811	1.50594	1.09817	2.06514	0.0110474	AT	13	null	null	0
IL1RAP	68105	0.817644	0.700005	0.955051	0.0110777	AT	10.2	null	null	0
DYNLT3	88790	1.42391	1.084	1.87041	0.0110985	AT	7	null	null	0
FAM175A	69800	0.791382	0.660634	0.948008	0.0111021	AT	12	null	null	0
FAM175A	69798	1.2636	1.05484	1.51369	0.0111042	AT	5	null	null	0
DYNLT3	88789	0.702315	0.534656	0.92255	0.0111098	AT	6.2	null	null	0
ZSCAN20	1679	0.869275	0.780161	0.968568	0.0111265	AT	8	null	null	0
ZSCAN20	1678	1.15038	1.03245	1.28179	0.0111265	AT	6.2	null	null	0
FANCD2	63304	1.65752	1.12165	2.44941	0.0112083	AT	10.2	null	null	0
UEVLD	14667	0.747803	0.597336	0.936173	0.011233	AT	14	null	null	0
UEVLD	14666	1.33725	1.06818	1.6741	0.0112332	AT	8	null	null	0
MORN1	253	1.11336	1.02463	1.20977	0.011267	AT	17	null	null	0
SUMO3	60834	1.50303	1.09658	2.06014	0.0113067	AT	4	null	null	0
SUMO3	60835	0.665322	0.485403	0.91193	0.0113071	AT	5	null	null	0
ZMYM5	25406	0.760436	0.615189	0.939976	0.0113303	AT	6.2	null	null	0
ZMYM5	25405	1.31503	1.06386	1.62552	0.0113303	AT	8	null	null	0
PAXIP1-AS2	82429	1.23513	1.04868	1.45472	0.0114288	AT	8	null	null	0
TBL2	79962	0.55058	0.346568	0.874686	0.0115083	AT	10	null	null	0
TBL2	79963	1.81626	1.14326	2.88544	0.0115091	AT	8	null	null	0
DHDDS	1273	0.738154	0.583214	0.934256	0.0115469	AT	10.2	null	null	0
COL14A1	85018	0.727853	0.568536	0.931815	0.0117265	AT	53	null	null	0
HSPB11	3097	0.783076	0.647448	0.947116	0.0117391	AT	6	null	null	0
AP4M1	80887	1.3852	1.07505	1.78483	0.0117519	AT	17	null	null	0
PIK3C3	45317	0.837456	0.729513	0.961372	0.0117527	AT	25	null	null	0
AP4M1	80889	0.721923	0.560283	0.930196	0.0117529	AT	16.2	null	null	0
NFATC1	46240	1.16545	1.03453	1.31293	0.0117906	AT	9.2	null	null	0
NFATC1	46239	0.858054	0.761662	0.966644	0.0118038	AT	11	null	null	0
ZNF20	47778	0.861934	0.767742	0.967681	0.0118572	AT	5	null	null	0
ZNF20	47777	1.16018	1.0334	1.30252	0.0118572	AT	6	null	null	0
MAT2A	54281	1.35839	1.06998	1.72454	0.0118871	AT	9.2	null	null	0
MAT2A	54280	0.736166	0.579866	0.934595	0.0118875	AT	10	null	null	0
PIK3C3	45316	1.19325	1.03957	1.36966	0.0120169	AT	21.3	null	null	0
COL14A1	85016	1.3712	1.07129	1.75506	0.012183	AT	54	null	null	0
ANKH	71593	1.32828	1.0635	1.65897	0.0123225	AT	2	null	null	0
ANKH	71594	0.752871	0.602789	0.940321	0.0123344	AT	13.3	null	null	0
ZNF250	85677	1.25611	1.05062	1.50179	0.0123564	AT	9.2	null	null	0
RABL2B	62912	1.32038	1.06131	1.6427	0.0126348	AT	8	null	null	0
RABL2B	62913	0.757358	0.608755	0.942237	0.012636	AT	12.3	null	null	0
MPDU1	38999	0.648939	0.461533	0.91244	0.0128835	AT	8	null	null	0
HSPB11	3099	1.32291	1.06001	1.65102	0.0133053	AT	7	null	null	0
RIOK2	72878	0.810074	0.68541	0.957413	0.013496	AT	10	null	null	0
RIOK2	72877	1.23444	1.04447	1.45897	0.0134992	AT	8.2	null	null	0
C19orf70	46867	0.662292	0.477383	0.918824	0.0136328	AT	6	null	null	0
C19orf70	46866	1.5099	1.08834	2.09475	0.0136337	AT	5	null	null	0
MBTD1	42519	0.793221	0.659777	0.953654	0.0137051	AT	17	null	null	0
MBTD1	42518	1.26068	1.0486	1.51566	0.0137055	AT	16.4	null	null	0
ETV7	75972	1.24337	1.04518	1.47915	0.013942	AT	9	null	null	0
ETV7	75971	0.804265	0.676064	0.956776	0.0139435	AT	8	null	null	0
ZNF585A	49446	1.15604	1.02972	1.29785	0.0140458	AT	12	null	null	0
PUS10	53675	0.829859	0.715059	0.963088	0.014086	AT	20	null	null	0
PUS10	53676	1.20502	1.03833	1.39849	0.014086	AT	4.2	null	null	0
CRYZL1	60452	0.841851	0.733717	0.965922	0.0141173	AT	17	null	null	0
DCST1	7885	1.19453	1.03641	1.37677	0.0141422	AT	17	null	null	0
YIF1B	49606	1.16603	1.031	1.31875	0.0144433	AT	9.2	null	null	0
YIF1B	49607	0.857611	0.758293	0.969937	0.0144436	AT	10	null	null	0
RPS3	17835	0.515983	0.303469	0.877318	0.0145552	AT	7.2	null	null	0
WDR33	55242	1.81449	1.12396	2.92926	0.0147611	AT	6.4	null	null	0
RBM25	28252	1.38345	1.06567	1.79597	0.0147817	AT	11.5	null	null	0
RBM25	28254	0.722835	0.556803	0.938376	0.014783	AT	21	null	null	0
MRPL23	13894	0.874984	0.785836	0.974245	0.0148553	AT	5.3	null	null	0
CCDC132	80456	1.45972	1.07659	1.97918	0.0148878	AT	22	null	null	0
COA1	79335	1.37004	1.06309	1.76562	0.0149863	AT	8	null	null	0
CXCL12	11344	0.767882	0.62067	0.95001	0.0150067	AT	4	null	null	0
TMED4	79538	0.641232	0.448187	0.917425	0.0150337	AT	5	null	null	0
TMED4	79539	1.5595	1.09001	2.23121	0.0150337	AT	4.2	null	null	0
TIAL1	13267	0.634072	0.439129	0.915557	0.015072	AT	13	null	null	0
TIAL1	13266	1.57711	1.09223	2.27724	0.015072	AT	5.2	null	null	0
EBPL	25899	0.694182	0.516987	0.932108	0.0152021	AT	6	null	null	0
EBPL	25900	1.44054	1.07283	1.93428	0.0152046	AT	3	null	null	0
HIF3A	50552	0.879088	0.792134	0.975586	0.0153044	AT	19	null	null	0
ANKRD11	38078	1.42458	1.06955	1.89746	0.0155309	AT	8	null	null	0
KIF4A	89373	0.799813	0.667148	0.95886	0.0157804	AT	32	null	null	0
KIF4A	89372	1.25029	1.04291	1.49892	0.0157804	AT	29	null	null	0
FNDC5	1642	0.918003	0.856352	0.984093	0.0158644	AT	7	null	null	0
RAB11B	47226	0.673951	0.489044	0.928771	0.0158847	AT	5	null	null	0
RAB11B	47227	1.48377	1.07668	2.04477	0.015887	AT	4.2	null	null	0
CSF2RA	88361	1.09753	1.01732	1.18406	0.016241	AT	16	null	null	0
PDLIM5	69971	0.655756	0.464832	0.925098	0.0162432	AT	25.3	null	null	0
PHLDB3	50196	0.628121	0.429701	0.918163	0.0163615	AT	16	null	null	0
PHLDB3	50197	1.59205	1.08913	2.3272	0.0163615	AT	6.2	null	null	0
PRRG1	88778	0.77197	0.624904	0.953649	0.0163911	AT	6	null	null	0
PRRG1	88777	1.29539	1.0486	1.60025	0.0163911	AT	5	null	null	0
FAM102B	3940	1.37248	1.05963	1.77769	0.0164484	AT	12	null	null	0
FAM102B	3941	0.728608	0.562527	0.943722	0.0164484	AT	11	null	null	0
ZSCAN30	45154	0.744321	0.58445	0.947924	0.0166903	AT	6	null	null	0
C15orf57	29993	0.8396	0.727395	0.969113	0.0169119	AT	4.3	null	null	0
ZNF571	49547	0.816884	0.691767	0.96463	0.0171021	AT	6	null	null	0
PEX26	61022	0.826635	0.706754	0.966851	0.0172346	AT	5	null	null	0
PEX26	61021	1.20972	1.03429	1.41492	0.0172346	AT	9	null	null	0
CDH23	12060	1.20035	1.03266	1.39528	0.0173829	AT	72	null	null	0
VPS33A	24941	1.59059	1.08394	2.33407	0.0176983	AT	6	null	null	0
VPS33A	24940	0.62874	0.42847	0.922616	0.0177113	AT	15	null	null	0
KLHL24	67804	1.2403	1.03806	1.48194	0.017727	AT	8.2	null	null	0
KLHL24	67805	0.806257	0.674791	0.963335	0.017727	AT	9	null	null	0
ZNF571	49548	1.22219	1.03536	1.44274	0.0177657	AT	5	null	null	0
CXorf36	88883	1.3311	1.05068	1.68636	0.0178115	AT	6	null	null	0
CXorf36	88882	0.751265	0.592997	0.951773	0.0178134	AT	3	null	null	0
NFASC	9492	1.08455	1.01402	1.15999	0.0179891	AT	37	null	null	0
NFASC	9493	0.922039	0.862076	0.986173	0.017992	AT	20.2	null	null	0
SPATS2	21578	0.689823	0.507001	0.938569	0.0181029	AT	19	null	null	0
SPATS2	21577	1.44965	1.06545	1.97238	0.0181029	AT	6	null	null	0
MDH2	80158	0.52261	0.304669	0.896452	0.0184233	AT	10	null	null	0
MDH2	80159	1.91346	1.1155	3.28225	0.018425	AT	2	null	null	0
ZNF528	51454	0.87795	0.787812	0.9784	0.0185206	AT	10	null	null	0
DIP2A	60939	1.44552	1.06262	1.96641	0.0189363	AT	30	null	null	0
ABCD3	3810	1.44468	1.06249	1.96436	0.0189456	AT	10	null	null	0
ABCD3	3811	0.692193	0.509072	0.941185	0.0189456	AT	25	null	null	0
WDR33	55244	0.795549	0.657153	0.963091	0.0189941	AT	22	null	null	0
ZMYM6	1712	0.699093	0.518212	0.943112	0.0191097	AT	20	null	null	0
CCL28	71946	1.18078	1.02726	1.35723	0.0193604	AT	6	null	null	0
CCL28	71947	0.846906	0.736798	0.973469	0.0193682	AT	5.2	null	null	0
ZNF527	49507	0.847915	0.738335	0.973758	0.0194597	AT	5.4	null	null	0
NEK2	9717	0.773473	0.623518	0.959491	0.0194894	AT	8	null	null	0
NEK2	9718	1.29287	1.04222	1.6038	0.0194903	AT	7.2	null	null	0
AUH	86822	1.25881	1.03713	1.52788	0.0198678	AT	7	null	null	0
AUH	86823	0.794401	0.654504	0.9642	0.0198678	AT	11	null	null	0
FMO5	7369	0.8023	0.666283	0.966084	0.0201254	AT	9	null	null	0
SFXN5	53947	0.625995	0.421535	0.929625	0.0202516	AT	15	null	null	0
SFXN5	53946	1.59745	1.0757	2.37228	0.0202519	AT	10.2	null	null	0
CRYZL1	60450	1.24595	1.03435	1.50084	0.0205825	AT	8	null	null	0
ABLIM2	68744	1.14961	1.02142	1.29388	0.0208105	AT	25	null	null	0
ABLIM2	68745	0.869868	0.772878	0.97903	0.0208152	AT	18.4	null	null	0
FBXO22	31899	0.825372	0.701271	0.971435	0.0209678	AT	7	null	null	0
FBXO22	31900	1.21157	1.0294	1.42598	0.0209686	AT	6.2	null	null	0
USP4	64852	1.78458	1.09111	2.91878	0.0210357	AT	7	null	null	0
ZNF585A	49449	0.770332	0.61701	0.961752	0.0212021	AT	7.6	null	null	0
ORAI3	36207	0.75699	0.597368	0.959264	0.0212133	AT	3.3	null	null	0
ORAI3	36208	1.32102	1.04246	1.67401	0.0212144	AT	4	null	null	0
ZMYM6	1710	1.43976	1.05516	1.96455	0.02153	AT	18	null	null	0
DENND2A	82008	1.0912	1.01288	1.17556	0.021627	AT	14.2	null	null	0
DENND2A	82009	0.916429	0.850659	0.987284	0.0216317	AT	20	null	null	0
ZNF283	50245	1.1124	1.01573	1.21828	0.0216571	AT	8	null	null	0
USP4	64851	1.58453	1.06966	2.34722	0.0216832	AT	8	null	null	0
GALNT10	74212	0.501664	0.278377	0.904049	0.0216958	AT	15	null	null	0
GALNT10	74213	1.99338	1.10613	3.59229	0.021696	AT	8.2	null	null	0
THADA	53380	1.23804	1.03168	1.48567	0.021719	AT	41	null	null	0
THADA	53382	0.817777	0.688662	0.971099	0.0217641	AT	40	null	null	0
HGF	80248	0.880375	0.789573	0.98162	0.0217916	AT	20	null	null	0
CBWD5	86497	0.799114	0.659534	0.968233	0.022047	AT	19	null	null	0
INPP5B	1848	1.58902	1.06789	2.36446	0.0223782	AT	7.3	null	null	0
INPP5B	1849	0.629321	0.422931	0.936429	0.0223789	AT	24	null	null	0
TRIM14	87031	1.42604	1.0504	1.93601	0.0228936	AT	8	null	null	0
TRIM14	87030	0.701246	0.516528	0.952022	0.0228962	AT	7.3	null	null	0
FLAD1	7865	0.774497	0.621346	0.965397	0.0230121	AT	6.3	null	null	0
PPP2R1B	18672	0.700445	0.514937	0.952784	0.0233246	AT	16	null	null	0
PPP2R1B	18674	1.42766	1.04956	1.94199	0.0233246	AT	18	null	null	0
MED11	38577	0.809629	0.674573	0.971723	0.0233276	AT	3.2	null	null	0
MED11	38578	1.23513	1.0291	1.48242	0.0233276	AT	2.2	null	null	0
SP140L	57887	1.38536	1.04446	1.83751	0.0237074	AT	8.2	null	null	0
SP140L	57888	0.721839	0.544216	0.957435	0.0237104	AT	18	null	null	0
ZNF765	51717	1.3366	1.03921	1.71911	0.0238552	AT	5.2	null	null	0
AP1S2	88569	0.889709	0.803934	0.984635	0.0238634	AT	5.2	null	null	0
AP1S2	88571	1.12396	1.0156	1.24388	0.0238667	AT	6	null	null	0
DNAJC2	81187	1.41679	1.04706	1.91708	0.0239436	AT	3.2	null	null	0
DNAJC2	81185	0.705813	0.521614	0.955059	0.0239475	AT	18	null	null	0
CNOT2	23366	1.32916	1.03812	1.70179	0.0240268	AT	5	null	null	0
TIPRL	8902	1.28572	1.03346	1.59956	0.0241153	AT	5	null	null	0
TIPRL	8901	0.777785	0.62518	0.967639	0.024123	AT	8	null	null	0
ZNF169	86927	0.831837	0.708714	0.97635	0.0242707	AT	6.2	null	null	0
INPP4B	70687	1.79555	1.07868	2.98882	0.0243673	AT	34	null	null	0
SYNPO	74103	0.473201	0.246411	0.908723	0.0246106	AT	5.2	null	null	0
SYNPO	74104	2.11326	1.10044	4.05826	0.024612	AT	6	null	null	0
SP140	57869	1.14111	1.01689	1.2805	0.024778	AT	4	null	null	0
SLC44A5	3481	0.927862	0.869122	0.990572	0.0248428	AT	25	null	null	0
ESR2	27868	0.824165	0.695923	0.97604	0.0250258	AT	16	null	null	0
SZT2	2175	1.47661	1.04999	2.07656	0.0250656	AT	7	null	null	0
SRSF5	28157	1.42436	1.04512	1.94123	0.0251343	AT	7.3	null	null	0
ZNF675	48820	0.881046	0.788602	0.984327	0.0251381	AT	6	null	null	0
SRSF5	28155	0.702091	0.515154	0.956862	0.025148	AT	10	null	null	0
CNOT2	23370	0.755382	0.590901	0.965648	0.025159	AT	17	null	null	0
CEP78	86656	1.24863	1.02802	1.51658	0.025185	AT	16.2	null	null	0
CEP78	86655	0.800895	0.659394	0.972762	0.0251964	AT	17	null	null	0
C19orf82	47375	0.83706	0.716275	0.978212	0.0252843	AT	5	null	null	0
ZNF19	37450	0.779772	0.626966	0.96982	0.025395	AT	8	null	null	0
ZNF19	37449	1.28242	1.03111	1.59497	0.0253975	AT	9	null	null	0
PAPOLA	29203	0.619491	0.407082	0.942732	0.0254012	AT	21	null	null	0
PRDM2	722	1.25911	1.02875	1.54106	0.0254254	AT	13	null	null	0
PRDM2	721	0.794212	0.648906	0.972057	0.025426	AT	11	null	null	0
CYP46A1	29229	1.08367	1.00988	1.16286	0.0255325	AT	17	null	null	0
BCAP29	81357	1.29059	1.0317	1.61444	0.025541	AT	11	null	null	0
ELAC1	45555	0.861032	0.754996	0.98196	0.0256497	AT	4	null	null	0
ELAC1	45554	1.16138	1.01837	1.32449	0.0256543	AT	3.3	null	null	0
CEP76	44705	0.85993	0.753163	0.981832	0.0256781	AT	13.2	null	null	0
RUNX2	76401	0.800881	0.65879	0.97362	0.0258641	AT	9	null	null	0
RUNX2	76402	1.24861	1.02708	1.51792	0.0258718	AT	10	null	null	0
PSPC1	25402	0.861708	0.755943	0.98227	0.0258998	AT	9	null	null	0
UTP23	84967	2.07212	1.09111	3.93518	0.0259867	AT	6	null	null	0
KLC1	29465	0.745773	0.576033	0.96553	0.0260024	AT	17	null	null	0
B3GALNT2	10352	0.749685	0.581637	0.966285	0.0260938	AT	13	null	null	0
B3GALNT2	10353	1.33389	1.03489	1.71929	0.0260941	AT	8.2	null	null	0
LRRC36	37014	0.894614	0.810976	0.986876	0.0261645	AT	15	null	null	0
SLC44A5	3480	1.0761	1.00872	1.14798	0.0262046	AT	24	null	null	0
CEP152	30501	0.807761	0.669137	0.975105	0.0262559	AT	27	null	null	0
CEP152	30502	1.23799	1.02553	1.49446	0.0262574	AT	26.2	null	null	0
ZNF675	48822	1.36075	1.03632	1.78674	0.0266461	AT	4	null	null	0
STXBP4	42571	0.834809	0.711481	0.979513	0.0268454	AT	19	null	null	0
STXBP4	42570	1.19788	1.02091	1.40552	0.0268475	AT	12	null	null	0
SRSF3	75983	0.740097	0.566893	0.96622	0.0269262	AT	7	null	null	0
SRSF3	75984	1.35117	1.03496	1.764	0.0269262	AT	4.2	null	null	0
LRRC36	37015	1.11634	1.01256	1.23076	0.0270608	AT	10.2	null	null	0
ARHGEF39	86272	0.869081	0.767253	0.984423	0.0273221	AT	12	null	null	0
ARHGEF39	86271	1.15064	1.01582	1.30335	0.0273243	AT	11.4	null	null	0
LDB3	12421	1.11603	1.01235	1.23033	0.0273357	AT	10	null	null	0
RTKN2	11871	1.25677	1.02566	1.53996	0.0275033	AT	14	null	null	0
PSMA2	79317	1.70254	1.05918	2.73668	0.0279919	AT	6.2	null	null	0
FBLIM1	772	0.719162	0.535874	0.965143	0.0280678	AT	11	null	null	0
FBLIM1	773	1.39047	1.03609	1.86606	0.0280811	AT	9.2	null	null	0
ZNF527	49506	1.16143	1.01616	1.32747	0.0281524	AT	6.2	null	null	0
GABRA2	69160	1.13639	1.0133	1.27443	0.0288297	AT	6	null	null	0
TADA3	63178	1.81604	1.06175	3.10619	0.0293492	AT	9.2	null	null	0
TADA3	63179	0.550659	0.321942	0.941861	0.0293551	AT	10	null	null	0
NPLOC4	44133	1.7049	1.05356	2.75893	0.0298255	AT	17.2	null	null	0
NPLOC4	44132	0.586546	0.362459	0.949172	0.0298275	AT	18	null	null	0
PDCD6	71424	0.480296	0.247717	0.93124	0.0299433	AT	7	null	null	0
CSF2RA	88362	0.914273	0.843151	0.991393	0.0300697	AT	17.2	null	null	0
DIS3L2	57982	1.32019	1.02688	1.69727	0.0302438	AT	8.3	null	null	0
RBP1	67032	1.2633	1.02255	1.56071	0.0302551	AT	3	null	null	0
MRPL42	23698	1.26701	1.02269	1.5697	0.0303726	AT	6.2	null	null	0
TMEM44	68159	0.733783	0.553907	0.972074	0.0309771	AT	15	null	null	0
TMEM44	68156	1.36279	1.02872	1.80534	0.0309812	AT	6.2	null	null	0
RBP1	67033	0.791809	0.640459	0.978926	0.0310246	AT	6	null	null	0
ZFP14	49378	0.790501	0.638164	0.979202	0.0313665	AT	5	null	null	0
ZFP14	49377	1.26502	1.02124	1.56699	0.0313665	AT	4.3	null	null	0
CXCL12	11342	0.869882	0.766133	0.987681	0.0314552	AT	5.2	null	null	0
MKNK1	2804	0.531093	0.298336	0.945445	0.0315063	AT	7.2	null	null	0
PLCE1	12578	0.879952	0.78278	0.989187	0.0321879	AT	34	null	null	0
PLCE1	12579	1.13643	1.01093	1.2775	0.0321889	AT	33.2	null	null	0
OXNAD1	63639	0.832818	0.70432	0.984759	0.0323885	AT	10.3	null	null	0
THAP6	69530	0.855739	0.741884	0.987067	0.0324624	AT	5	null	null	0
ISG20	32392	0.77072	0.607054	0.978511	0.0324902	AT	6	null	null	0
ISG20	32391	1.29749	1.02196	1.6473	0.0324902	AT	4	null	null	0
PDLIM5	69973	1.63692	1.04169	2.57226	0.0325895	AT	4	null	null	0
EDA	89363	1.09934	1.00782	1.19916	0.0327074	AT	3	null	null	0
PRKCA	43100	0.79137	0.638392	0.981007	0.0327675	AT	19	null	null	0
PRKCA	43101	1.26363	1.01936	1.56643	0.0327714	AT	10	null	null	0
S100PBP	1636	1.11146	1.00868	1.2247	0.0327954	AT	7	null	null	0
S100PBP	1635	0.899722	0.816526	0.991395	0.0327987	AT	9	null	null	0
PDHA1	88632	0.716971	0.52814	0.973317	0.0328936	AT	12	null	null	0
ARL17B	42018	0.789229	0.634969	0.980966	0.0329118	AT	4.2	null	null	0
PDHA1	88631	1.39465	1.02731	1.89334	0.0329479	AT	6.2	null	null	0
TIA1	53868	0.75262	0.579621	0.977254	0.032956	AT	15	null	null	0
ITIH5	10715	0.903757	0.823444	0.991904	0.0330766	AT	16.2	null	null	0
FAM72A	9578	0.820671	0.684236	0.98431	0.0331358	AT	6	null	null	0
EDA	89361	0.909901	0.834067	0.99263	0.0334561	AT	10	null	null	0
ZNF724P	48813	0.901386	0.819063	0.991984	0.0336135	AT	4	null	null	0
ZNF724P	48814	1.10937	1.00803	1.2209	0.0337	AT	3.2	null	null	0
ZNFX1	59745	0.627665	0.408307	0.96487	0.033756	AT	14	null	null	0
ZNFX1	59744	1.59319	1.0364	2.44911	0.0337603	AT	16	null	null	0
CEP76	44706	1.15512	1.01093	1.31987	0.0340271	AT	9.2	null	null	0
IGF1	24050	1.09018	1.00638	1.18096	0.0343556	AT	5.2	null	null	0
GCAT	62157	1.17935	1.01185	1.37458	0.0348004	AT	10	null	null	0
RASEF	86676	1.10235	1.00696	1.20678	0.0348504	AT	2	null	null	0
RASEF	86677	0.907153	0.828652	0.993092	0.0348515	AT	18	null	null	0
KIAA1958	87249	1.23375	1.0147	1.50008	0.0351746	AT	3.2	null	null	0
KIAA1958	87250	0.810537	0.666631	0.985508	0.0351746	AT	5	null	null	0
IGF1	24051	0.917692	0.847092	0.994176	0.0354691	AT	6	null	null	0
TBC1D8B	89808	0.805946	0.659097	0.985514	0.0355405	AT	22	null	null	0
GCAT	62155	0.848241	0.727511	0.989006	0.0356331	AT	9.2	null	null	0
TRAF4	39972	1.17564	1.01084	1.36731	0.0357434	AT	3	null	null	0
TRAF4	39973	0.850602	0.731364	0.98928	0.0357434	AT	9.4	null	null	0
SLC13A3	59696	0.923627	0.857598	0.994739	0.0357861	AT	5	null	null	0
NEIL3	71226	1.16751	1.01024	1.34926	0.0359034	AT	8.2	null	null	0
PLEKHA5	20646	0.790293	0.634202	0.9848	0.0360469	AT	36	null	null	0
CEP41	81797	0.842155	0.717087	0.989035	0.0362263	AT	13	null	null	0
NEIL3	71227	0.856646	0.741163	0.990124	0.0362331	AT	10	null	null	0
CEP41	81795	1.18742	1.01108	1.39452	0.0362377	AT	4	null	null	0
ANKS3	33795	0.727481	0.540106	0.97986	0.0362728	AT	19	null	null	0
CRYZL1	60451	1.45236	1.02403	2.05986	0.036337	AT	3	null	null	0
PRICKLE3	89099	0.796254	0.643243	0.985663	0.0363854	AT	10.4	null	null	0
PRICKLE3	89098	1.25588	1.01455	1.55462	0.0363854	AT	5.2	null	null	0
PIK3R2	48398	1.51834	1.02616	2.24658	0.0366945	AT	25	null	null	0
PIK3R2	48396	0.658664	0.445164	0.974557	0.0367169	AT	16.2	null	null	0
ZNF250	85674	0.809236	0.663261	0.987338	0.0370218	AT	6.3	null	null	0
HOXB3	42197	1.3707	1.01875	1.84425	0.0372854	AT	8	null	null	0
HOXB3	42198	0.729572	0.542241	0.981621	0.0372981	AT	10.2	null	null	0
MED23	77615	1.16003	1.00866	1.33411	0.0374519	AT	31.4	null	null	0
ABCA9	43158	1.15561	1.00841	1.32429	0.0374844	AT	6.2	null	null	0
AIG1	77971	1.25984	1.01341	1.56618	0.0375292	AT	9	null	null	0
ZNF630	88952	1.14551	1.00777	1.30207	0.0376695	AT	14	null	null	0
ZNF630	88951	0.872976	0.76801	0.992287	0.0376696	AT	6.2	null	null	0
MARVELD3	37467	1.2855	1.01428	1.62923	0.0377773	AT	4	null	null	0
RNASEL	9155	1.37786	1.01707	1.86665	0.0385245	AT	6	null	null	0
RNASEL	9156	0.725774	0.535726	0.983241	0.0385396	AT	8	null	null	0
LDB3	12422	0.901298	0.816801	0.994535	0.0385402	AT	17	null	null	0
C1orf85	8222	1.17028	1.00804	1.35863	0.0389113	AT	7	null	null	0
C1orf85	8221	0.854499	0.736035	0.99203	0.0389178	AT	6.3	null	null	0
HKR1	49481	1.11419	1.00531	1.23486	0.0393157	AT	16.2	null	null	0
FBXO16	83215	0.842499	0.715759	0.991681	0.0393602	AT	10	null	null	0
YAF2	21105	0.654231	0.436573	0.980405	0.0397968	AT	10	null	null	0
YAF2	21104	1.52851	1.01999	2.29057	0.0397968	AT	3.3	null	null	0
DONSON	60440	0.769279	0.59894	0.988063	0.0399758	AT	10.2	null	null	0
DONSON	60441	1.29992	1.01208	1.66962	0.0399758	AT	11	null	null	0
TRIM37	42721	1.53598	1.01947	2.3142	0.0401556	AT	26	null	null	0
FAM92A1	84520	1.39416	1.01497	1.915	0.0401967	AT	12.2	null	null	0
MED17	18328	0.787316	0.626349	0.98965	0.0404506	AT	12.2	null	null	0
MED17	18327	1.27014	1.01046	1.59655	0.0404517	AT	2.2	null	null	0
ZNF396	45166	1.27729	1.01036	1.61474	0.0407399	AT	4.2	null	null	0
RALGPS1	87611	1.16958	1.00654	1.35902	0.0408472	AT	14	null	null	0
NPHP1	54928	1.09664	1.00373	1.19815	0.041106	AT	21	null	null	0
NPHP1	54927	0.911844	0.834497	0.996361	0.041293	AT	4.2	null	null	0
KIF27	86700	0.859885	0.743653	0.994284	0.0416172	AT	19	null	null	0
CFLAR	56793	1.75649	1.02082	3.02233	0.0419113	AT	14	null	null	0
HKR1	49480	0.898531	0.810445	0.996192	0.0421085	AT	17.2	null	null	0
ANGPT2	82577	1.25749	1.00813	1.56851	0.0421747	AT	8.2	null	null	0
ANGPT2	82578	0.795239	0.637546	0.991937	0.0421781	AT	9	null	null	0
DCST1	7886	0.856723	0.737908	0.99467	0.0423444	AT	18	null	null	0
DEPDC5	61896	1.56033	1.01544	2.3976	0.0423695	AT	46	null	null	0
SPIRE2	38153	0.817035	0.672172	0.993118	0.0424258	AT	16	null	null	0
SPIRE2	38152	1.22393	1.00692	1.48771	0.0424324	AT	3	null	null	0
ASTN2	87369	1.11384	1.00343	1.2364	0.042952	AT	21	null	null	0
ASTN2	87368	0.897797	0.808801	0.996586	0.042952	AT	25.3	null	null	0
C4orf19	69001	0.876411	0.771295	0.995854	0.0430008	AT	5	null	null	0
C4orf19	69000	1.14102	1.00416	1.29652	0.0430008	AT	6	null	null	0
LAMP2	89999	1.19159	1.00541	1.41224	0.0431567	AT	10	null	null	0
ZNF343	58546	0.827059	0.688027	0.994186	0.0431706	AT	9	null	null	0
ZNF343	58547	1.20908	1.00583	1.45341	0.0431892	AT	8	null	null	0
DNASE1	33607	1.12586	1.00355	1.26307	0.0433444	AT	13	null	null	0
PEX13	53681	0.822644	0.680632	0.994287	0.043464	AT	5	null	null	0
PEX13	53682	1.21559	1.00574	1.46922	0.0434662	AT	2.3	null	null	0
NARF	44395	0.829703	0.692153	0.994588	0.0435245	AT	16	null	null	0
NARF	44396	1.20525	1.00544	1.44477	0.0435245	AT	13.2	null	null	0
TMEM242	78239	0.871793	0.763041	0.996046	0.0435656	AT	4	null	null	0
TMEM242	78240	1.14706	1.00397	1.31055	0.0435656	AT	3.2	null	null	0
ANKRD11	38077	0.809751	0.659411	0.994368	0.0440237	AT	18	null	null	0
ZNF606	52379	0.928754	0.864254	0.998068	0.044154	AT	7	null	null	0
RPS27L	31015	0.648847	0.425467	0.989507	0.0445419	AT	6	null	null	0
RPS27L	31016	1.54116	1.01058	2.35032	0.0445535	AT	5.2	null	null	0
GLRX3	13474	1.40136	1.00817	1.94788	0.0445989	AT	11.2	null	null	0
RPL28	52095	0.878008	0.773277	0.996922	0.0446937	AT	4.4	null	null	0
UTS2	520	1.08861	1.00193	1.1828	0.0449137	AT	5.2	null	null	0
COA1	79332	0.852662	0.729587	0.9965	0.045065	AT	7.2	null	null	0
FAN1	29777	1.2653	1.00513	1.59281	0.0451186	AT	16	null	null	0
FAN1	29778	0.790326	0.62782	0.994894	0.0451187	AT	5.2	null	null	0
TRIM37	42723	0.655558	0.433709	0.990887	0.0451348	AT	25.2	null	null	0
SLCO3A1	32547	1.1878	1.00365	1.40572	0.0452405	AT	11	null	null	0
SLCO3A1	32546	0.841897	0.71138	0.99636	0.0452428	AT	10.2	null	null	0
ACAD8	19552	0.677793	0.462969	0.992299	0.0455311	AT	12	null	null	0
ACAD8	19551	1.47538	1.00776	2.15997	0.0455311	AT	11	null	null	0
TMC7	34279	1.23003	1.00412	1.50675	0.0455316	AT	16.2	null	null	0
TMC7	34280	0.813002	0.663688	0.995908	0.0455465	AT	17	null	null	0
MYO1G	79578	1.13136	1.00244	1.27685	0.0455521	AT	12.2	null	null	0
IL1RAP	68107	1.14962	1.00276	1.31799	0.0455552	AT	13	null	null	0
NUP43	78095	1.20477	1.00362	1.44625	0.0456415	AT	7.2	null	null	0
NUP43	78096	0.830031	0.691444	0.996397	0.0456415	AT	8.3	null	null	0
PIGL	39427	0.821549	0.677501	0.996224	0.0456701	AT	9	null	null	0
EFR3B	52846	1.07403	1.00137	1.15196	0.0456984	AT	21.2	null	null	0
NAA35	86742	1.3075	1.00509	1.7009	0.0457387	AT	13	null	null	0
NAA35	86741	0.764821	0.587926	0.99494	0.045742	AT	25	null	null	0
CRADD	23716	0.687998	0.476643	0.993074	0.0458166	AT	5	null	null	0
GTF2IRD2	80093	1.41634	1.00639	1.99328	0.0458791	AT	16	null	null	0
TROVE2	9255	1.15806	1.0025	1.33777	0.0461694	AT	11	null	null	0
TROVE2	9253	0.863521	0.747524	0.997518	0.0461824	AT	10.5	null	null	0
RDH13	52000	0.800211	0.642655	0.996395	0.0463439	AT	10	null	null	0
RDH13	52001	1.24967	1.00362	1.55604	0.0463448	AT	12	null	null	0
CP	67213	1.1409	1.00199	1.29907	0.0465987	AT	19	null	null	0
FLT1	25558	0.893737	0.800086	0.998349	0.0466762	AT	35	null	null	0
ENSA	7493	0.802332	0.645766	0.996858	0.0467698	AT	6	null	null	0
ZNF66	48728	0.901535	0.813949	0.998546	0.0468272	AT	5	null	null	0
TBC1D1	69013	0.802355	0.645754	0.996933	0.0468457	AT	23	null	null	0
TBC1D1	69014	1.24633	1.00308	1.54858	0.0468457	AT	3	null	null	0
SLC13A3	59695	1.07129	1.00094	1.14658	0.0469016	AT	16	null	null	0
MAPK1	61256	0.767948	0.591723	0.996657	0.0471288	AT	9	null	null	0
MAPK1	61257	1.30213	1.00332	1.68993	0.0471576	AT	8.2	null	null	0
BIN3	83045	1.25165	1.00244	1.56282	0.0475371	AT	8	null	null	0
USP49	76147	1.26988	1.00258	1.60846	0.0475572	AT	12.3	null	null	0
USP49	76148	0.787483	0.621719	0.997443	0.0475693	AT	13	null	null	0
TBX6	36063	1.08655	1.00083	1.17961	0.0477396	AT	5.3	null	null	0
RALGPS1	87608	0.84855	0.721121	0.998497	0.0479198	AT	24	null	null	0
ANKRD42	18050	0.861392	0.74296	0.998702	0.0480218	AT	6.2	null	null	0
PHC3	67602	1.34105	1.00229	1.79432	0.0482286	AT	6.2	null	null	0
2018-09-11	69618	1.53284	1.00321	2.34208	0.0482932	AT	11.2	null	null	0
ZNF195	13965	0.719429	0.518739	0.997762	0.0484511	AT	13	null	null	0
UTS2	521	0.920052	0.846698	0.99976	0.0493413	AT	7	null	null	0
IFT172	53017	1.24569	1.00027	1.55132	0.0497167	AT	16.2	null	null	0
IFT172	53018	0.802768	0.644612	0.999728	0.0497167	AT	49	null	null	0
PHC3	67600	0.752613	0.566588	0.999715	0.0497702	AT	16	null	null	0
PRMT1	51043	2.24498	1.6231	3.10513	1.0259e-06	ES	4.1:4.2:5	3	6	0
SMPD4	55292	1.33094	1.15589	1.53252	7.08678e-05	ES	13	11	14	0
RPS6KB1	42835	1.34299	1.16051	1.55416	7.56555e-05	ES	9	7	10	0
SYTL2	18152	1.33023	1.15392	1.53348	8.3741e-05	ES	11.1:11.2	10.3	12.2	0
FAIM	67016	1.20613	1.09739	1.32564	0.000101157	ES	3	1	6	0
RQCD1	57499	1.54445	1.23934	1.92468	0.000108455	ES	2	1	3	0
SMPD4	55298	1.29312	1.13405	1.47451	0.000123951	ES	11:13:00	10	14	0
IFI27	29087	0.744197	0.639509	0.866024	0.000133685	ES	3.2	1	4.1	1
C11orf80	17129	1.24275	1.11085	1.39031	0.000146862	ES	02:03:00	1	4	0
TMED5	3779	1.74908	1.30887	2.33733	0.000157062	ES	3	2	4.1	0
TXN2	96153	1.37544	1.16552	1.62316	0.000161433	ES	04:05:00	3.2	6	1
IRF3	51008	1.12587	1.05859	1.19743	0.000162503	ES	1.2:1.3:1.4:1.5:2	1.1	3	0
DMWD	50528	1.30025	1.133	1.49219	0.000185842	ES	4	3	5	0
CPSF7	16217	1.85409	1.33837	2.56854	0.000205181	ES	4	3	6.1	0
ARHGAP4	90526	1.37199	1.15972	1.62311	0.000226115	ES	7	6.2	8	0
PLEKHM2	767	1.23485	1.10341	1.38196	0.000239178	ES	7	6	8	0
IFI27	29086	0.751743	0.644978	0.876181	0.000260947	ES	3.1:3.2	1	4.1	0
GALK2	30524	1.38862	1.16401	1.65657	0.000265338	ES	15	14	16	0
RPL30	84636	1.54269	1.21971	1.9512	0.000297946	ES	2.2:3.1	2.1	3.2	0
SEC24D	70445	1.69443	1.2659	2.26803	0.000392642	ES	27	26	28	0
RABEP2	35894	1.28521	1.11859	1.47664	0.00039716	ES	3	2.2	4	0
SH3BP1	62140	1.18877	1.07963	1.30895	0.000432805	ES	16	15	17.2	0
SMC6	52732	1.42704	1.16969	1.74101	0.000457035	ES	9	8	10	0
MAPK3	36087	1.17046	1.07163	1.2784	0.00047035	ES	6.1:6.2	5	7.1	0
PQLC1	46259	1.29922	1.12156	1.50502	0.000484693	ES	06:09:00	5	10	0
DECR2	32887	1.3003	1.12188	1.50709	0.000488069	ES	5.1:5.2:5.3	4.2	6	0
MVD	38010	1.23088	1.09467	1.38404	0.000517143	ES	03:04:00	1	5	0
CISD2	70154	1.56248	1.21351	2.01179	0.000538945	ES	3	1	4	0
RPE	57242	1.59168	1.22216	2.07292	0.000563817	ES	8	7	10.1	0
IYD	78145	1.36327	1.14311	1.62582	0.000563868	ES	6.2	5	7	0
FAM193A	68579	1.26246	1.10583	1.44127	0.000564012	ES	22	21	23	0
TXNL4A	46283	1.16798	1.06804	1.27728	0.000668502	ES	00:06:07.200000	3	9	0
MAP3K4	78356	1.26005	1.10184	1.44096	0.000733306	ES	24	23	25	0
DOCK6	47644	1.1763	1.06973	1.29348	0.00080471	ES	23	22	24	0
UMPS	66538	1.62401	1.22165	2.15888	0.000843094	ES	2	1	3	0
LTBR	19854	2.01061	1.32489	3.05124	0.00103111	ES	8	7	9.1	0
RHOC	4236	1.14871	1.05702	1.24836	0.00108926	ES	1.2:1.3:2.2	1.1	2.3	0
ASCC1	12080	1.43641	1.15507	1.78626	0.00112904	ES	14:15:00	13	16	0
IST1	37517	1.38808	1.13805	1.69304	0.00121177	ES	13	12	14.1	0
TACC2	13344	1.1448	1.05418	1.2432	0.00130919	ES	12	11	13	0
RRBP1	58743	1.43611	1.15036	1.79284	0.00138679	ES	2	1	3.1	0
PAM	72896	1.36706	1.12753	1.65748	0.0014667	ES	23.1:23.2	22	26.1	1
PIGX	68260	1.532	1.17634	1.9952	0.00155122	ES	5	4	6.1	0
PUS7	81290	1.5393	1.17727	2.01268	0.00161683	ES	15	14	16	0
ITGB4	94682	1.18542	1.06629	1.31786	0.00164492	ES	1 day, 11:36:00	34	37	1
TARDBP	635	1.32514	1.11185	1.57935	0.00166609	ES	3	2	4	0
DFFB	346	1.14826	1.05297	1.25217	0.00176245	ES	5	4.3	6	0
FHL2	54828	1.22873	1.07957	1.39849	0.00181144	ES	4	3.2	5.1	0
SMPD4	55293	1.24582	1.08499	1.4305	0.00182993	ES	12	11	14	0
IL7	84254	1.9865	1.28917	3.06103	0.00186231	ES	5	4	6	0
TCTEX1D2	68236	1.21853	1.07585	1.38014	0.00186774	ES	4	3	5	0
MELK	86353	1.13508	1.04791	1.2295	0.00188445	ES	8	7	9	0
SULF2	59728	1.24517	1.08354	1.43091	0.00199495	ES	20	19.2	21	0
CDKAL1	75497	0.76282	0.641753	0.906727	0.00213764	ES	13	12	14	0
HAUS1	45389	1.177	1.06056	1.30622	0.0021673	ES	3	2.1	4	0
TRA2B	68039	1.38762	1.12542	1.71091	0.00217193	ES	2	1	3	0
ENAH	9989	0.89596	0.835052	0.961311	0.00222482	ES	13	12	14	0
NABP1	56615	1.20594	1.06946	1.35984	0.00224507	ES	4	3	5.2	0
FKBP3	27404	1.29188	1.0957	1.52319	0.00230718	ES	3	2	4	0
ZNF410	28328	1.33884	1.10948	1.61561	0.00233747	ES	14	13	16	0
DFFB	345	1.41794	1.13184	1.77634	0.00238867	ES	9	8	10	0
STEAP3	55101	1.12612	1.04289	1.21598	0.00242917	ES	3	1.1	5.3	0
GPR116	76429	0.805147	0.699475	0.926782	0.00253433	ES	22	21	23	0
PSMC5	43011	1.7625	1.2181	2.55019	0.00264127	ES	2.1	1	2.3	0
TMEM44	68164	1.19323	1.06335	1.33897	0.00265805	ES	7	6.1	8	0
SLMAP	65394	1.12847	1.04272	1.22128	0.002724	ES	25	24	26	0
FAM76A	1344	1.11491	1.03805	1.19745	0.00283834	ES	3	2	4	0
POLM	79458	1.1994	1.06435	1.3516	0.00285302	ES	6.3:7	6.2	8	0
TCERG1	73912	1.25556	1.08078	1.45861	0.0029234	ES	22	21	23	0
SLC7A6	37212	1.2055	1.06584	1.36346	0.00293083	ES	5	4	6	0
FOXK2	44408	1.50388	1.14917	1.96808	0.00294888	ES	9	8	10	0
MVK	24342	1.54193	1.15896	2.05145	0.00295227	ES	4	3	5	0
C16orf13	265880	0.77797	0.65919	0.918154	0.00297671	ES	3	1	4	1
FAM49B	85160	0.850671	0.764544	0.9465	0.00298247	ES	5	4	6	0
SEC16A	88176	1.12835	1.04179	1.2221	0.00302366	ES	1 day, 0:25:00	23.12	26	0
SKA2	42734	1.21954	1.06946	1.39068	0.00305461	ES	00:03:04.100000	2	5	0
GEMIN8	88533	1.19746	1.06279	1.3492	0.00307265	ES	2	1	3	0
PPP6R3	17327	1.19465	1.06129	1.34477	0.00322979	ES	2	1	3	0
TRIM13	25919	1.37841	1.11298	1.70714	0.00327346	ES	2	1.4	3	0
LRCH3	68324	1.31819	1.09642	1.58482	0.00328868	ES	21	20	22.1	0
MCCC1	67777	1.53128	1.15168	2.03601	0.00337314	ES	18	17	19	0
PKP2	21062	1.17152	1.05344	1.30283	0.00349517	ES	6	5	7	0
COL1A1	410161	1.2408	1.07346	1.43423	0.00351212	ES	19:20:21:22:25:26:27:28:29:30:31:33:34:35:36:37	18	38	1
INO80C	45189	1.22698	1.06944	1.40772	0.0035286	ES	3:4.1:4.2	1	5.1	0
DECR1	84409	1.11535	1.03639	1.20031	0.00356496	ES	2:3:4.1:4.2	1	5.2	0
SMPD4	95699	0.621414	0.451174	0.855889	0.00358363	ES	21	20	22	1
ATP2B4	9450	1.11794	1.037	1.20521	0.00364454	ES	21	20	22	0
CHD3	39069	1.44277	1.12558	1.84934	0.00380468	ES	34	33	35	0
NOL8	86860	1.30056	1.08778	1.55497	0.00393928	ES	4	3	5	0
PQLC1	46260	1.40445	1.11401	1.7706	0.00406096	ES	9	5	10	0
RNF146	77453	0.861857	0.778729	0.953858	0.00406805	ES	5.1	2	6	0
ABCE1	70753	1.17001	1.05112	1.30234	0.00407989	ES	14	13	15	0
LINC00999	11313	2.07603	1.25924	3.42264	0.00418823	ES	6	5	7	1
VEGFA	76329	1.4168	1.11605	1.79859	0.00421178	ES	7.1:8.1:8.2	6	9.1	0
IK	73709	1.30621	1.08766	1.56868	0.0042445	ES	3	2	4	0
OSTC	70305	1.80148	1.20274	2.69828	0.00429626	ES	4	3	5	0
DNAJA3	33726	1.19619	1.05775	1.35275	0.00430836	ES	2	1	3	0
ARIH2	64787	1.2401	1.06964	1.43773	0.00434123	ES	3	2	4.2	0
MKNK1	2809	1.31658	1.08956	1.59089	0.00439583	ES	11	10	12	0
ITGB3BP	3266	1.25836	1.0741	1.47423	0.00444222	ES	9	8	10	0
LGALS9	39858	0.85483	0.767115	0.952574	0.00451754	ES	5	4	6	0
UBA2	48974	1.4865	1.13032	1.95492	0.00456124	ES	3	1	4	0
DCTN5	35626	1.17296	1.05017	1.31011	0.00468868	ES	4	2	5	0
PQLC1	46266	1.16924	1.04911	1.30312	0.00470183	ES	4.1:4.2	2	5	0
TCF20	62501	1.23223	1.06609	1.42426	0.00471163	ES	4.1:4.2	3	5	0
METTL23	43638	1.18619	1.05297	1.33626	0.00496705	ES	1.4:2	1.3	3	0
TXNRD1	24106	0.758357	0.624548	0.920835	0.00522781	ES	6.2	4.2	10	0
CCDC138	54896	1.29218	1.07929	1.54705	0.00525979	ES	14	13	15	0
COA1	79345	1.2018	1.05546	1.36843	0.00552473	ES	3.1:3.2	1	4.2	0
HR	82940	0.842371	0.746148	0.951004	0.00557616	ES	17	16	18	0
LRRC20	12048	1.38031	1.09885	1.73388	0.00560407	ES	5	4	6	0
SH3TC1	68759	0.805329	0.690642	0.93906	0.00574284	ES	8	7	9	0
COL1A1	265560	1.22835	1.06152	1.4214	0.00575157	ES	16:17:18:19:20:21:22:25:26:27:28:29:30:31:33:34:35	15	36	1
DDX19B	37361	0.556982	0.367668	0.843776	0.00575303	ES	00:04:05.200000	3	6	0
SLC25A40	80340	1.32566	1.08515	1.61949	0.00577993	ES	11	10.2	12	0
TTC8	28787	1.13722	1.03791	1.24603	0.00581298	ES	6	2	7	0
IFT43	28536	1.64848	1.15558	2.35163	0.00582048	ES	2	1	3	0
FAM136A	53891	1.30123	1.07846	1.57003	0.00598957	ES	1.3	1.1	2	0
MTFR1L	1214	1.23214	1.06158	1.4301	0.00603078	ES	5	4.2	7.2	0
WDR41	72586	1.17273	1.04658	1.3141	0.00607032	ES	3	2	4	0
IPO11	72193	1.20258	1.05407	1.37201	0.00608711	ES	30	29	33	0
TBC1D10A	61719	1.46053	1.11399	1.91487	0.00612325	ES	11	10	12	0
MTO1	76748	1.1599	1.0431	1.28979	0.00615991	ES	8	7	9	0
VPS18	30060	1.30316	1.07804	1.57528	0.00620774	ES	3	2	4	0
EZH2	82157	1.24107	1.06316	1.44875	0.00622443	ES	13	12	14.1	0
SCNN1A	19842	1.18218	1.04832	1.33313	0.00634073	ES	10	9	11	0
STAU1	59738	1.48575	1.11793	1.9746	0.00637005	ES	4	3	5	0
PPIP5K1	30267	1.1398	1.03746	1.25223	0.00640809	ES	31	30	32	0
MPST	62076	1.12046	1.03244	1.21599	0.00643364	ES	1.2:2.2	1.1	3	0
THUMPD2	53337	1.17694	1.04634	1.32384	0.00663033	ES	4	3	5	0
C5orf22	71633	1.22978	1.05901	1.42808	0.00669619	ES	8	7.1	9	0
JKAMP	27750	1.10517	1.028	1.18813	0.00677399	ES	1.2:2.1	1.1	2.2	0
COL1A2	545747	1.44517	1.10654	1.88743	0.00686803	ES	9:10:11:12:13:14:15:16:17:18:19:20:21:22:23:24:25:26:27:28:29:30:31:32:42:43:44	8	45	1
ETV4	41713	0.837092	0.735806	0.952322	0.00688442	ES	3.2	2	4	0
GEMIN2	27356	1.19372	1.0498	1.35737	0.00690665	ES	5	4	6	0
CALCOCO2	42231	1.18506	1.04758	1.34059	0.00695983	ES	3	2	6	0
NFS1	59219	1.18541	1.04747	1.34151	0.00704445	ES	7	5	8	0
RSU1	10879	1.49368	1.11542	2.00023	0.00707958	ES	1.3	1.1	2	0
ZNF687	7588	1.12417	1.03219	1.22434	0.0072015	ES	2	1	3	0
GLOD4	38275	1.27931	1.06868	1.53144	0.0072816	ES	3	1	4.2	0
HMGN1	60610	1.16762	1.04255	1.3077	0.00734565	ES	00:07:08.200000	6.2	9	0
MYL6	22378	1.12855	1.03302	1.23292	0.00736706	ES	4.3	4.1	5	0
POLR2J3	81118	1.19801	1.04949	1.36754	0.00746524	ES	4.1	2	4.3	0
DPP9	46826	1.15735	1.03966	1.28835	0.00756417	ES	4	3	6	0
DNAJC25	87230	1.13811	1.03504	1.25145	0.00756443	ES	2.2	1	3.2	0
CD55	9639	1.7134	1.15348	2.5451	0.00764827	ES	10.1	9	15	0
FLYWCH1	33316	1.21097	1.05191	1.39409	0.0077143	ES	07:08:00	6	9	0
LRP8	3059	0.766475	0.629999	0.932515	0.00785223	ES	17	16	18	0
UBE2C	59608	1.23919	1.05794	1.45148	0.00785968	ES	00:02:03.100000	1.4	4	0
PHLDB1	19040	1.24864	1.05995	1.47092	0.00789763	ES	18.3	18.1	19	0
WARS	29291	1.09818	1.02478	1.17685	0.00797021	ES	3	2.3	4	0
FAM221A	78998	1.26611	1.06343	1.50743	0.00802764	ES	2	1	4	0
OTUD6B	84425	1.25911	1.06165	1.49329	0.0081132	ES	4	3	5	0
SMPD4	55299	1.20654	1.04989	1.38656	0.0081432	ES	11:12:00	10	14	0
KLHDC4	37961	1.36773	1.08409	1.72559	0.00826996	ES	5	4.2	6.1	0
2018-09-02	58372	0.899754	0.831811	0.973246	0.00836674	ES	3	2	4	0
VEGFA	76328	1.21376	1.05082	1.40196	0.00844003	ES	7.1:7.2:8.1:8.2	6	9.1	0
BLNK	12676	1.18189	1.04355	1.33856	0.0085095	ES	9	8	10	0
VCL	12254	1.1464	1.03546	1.26922	0.0085135	ES	19	18.2	20	0
ANKRD10	26273	1.13234	1.0321	1.24231	0.00858604	ES	5	3	6.1	0
ARRB2	38575	1.21765	1.05114	1.41054	0.00867227	ES	02:03:00	1	4.2	0
TPRKB	53980	1.30564	1.06976	1.59352	0.00870878	ES	3	2.2	4	0
LRRFIP2	63960	1.13269	1.03161	1.24368	0.00898888	ES	20	19	21	0
UBE2Q2	31898	0.743565	0.595206	0.928905	0.00906851	ES	4	3	5	0
RAB40C	32913	1.27612	1.062	1.5334	0.00927238	ES	6	5	7	0
PRPF3	7468	1.16455	1.03829	1.30617	0.00927771	ES	4	3	5	0
SLC2A8	87631	0.857753	0.764066	0.962928	0.00931934	ES	02:03:00	1	4	0
FAM221A	78994	1.11251	1.0265	1.20573	0.00940116	ES	2:3.1:3.2:3.3	1	4	0
NGLY1	63755	1.56213	1.1156	2.18737	0.00940801	ES	11	10	12	1
CLIP2	80079	1.3713	1.0804	1.74053	0.00944027	ES	9	8	10	0
SETD4	60518	1.17158	1.03947	1.32047	0.00948306	ES	4	3.4	5	0
RPS15A	34260	1.12504	1.02909	1.22994	0.00958397	ES	3.1:3.2:3.3	2.2	5.1	0
CKLF	36730	1.17156	1.03912	1.32089	0.00968358	ES	3.1:3.2	1	4	0
SORBS1	12641	1.08002	1.01882	1.14491	0.00970222	ES	9.1:9.2	8	10	0
STAU1	59743	1.21502	1.04826	1.40831	0.00971812	ES	2	1	3	0
PDCD4	13086	1.70044	1.13664	2.54391	0.00979021	ES	3	2	4	0
SNRNP40	1459	1.49774	1.10125	2.03697	0.0100329	ES	10	9	11	0
NAE1	36874	0.846466	0.745535	0.961062	0.0100804	ES	2.1:3.1	1	4	0
EXOSC10	647	1.13307	1.03021	1.24619	0.0100808	ES	4	3	5	0
YWHAB	59489	1.36741	1.07695	1.73621	0.0102149	ES	2	1	3	0
P4HA2	73263	1.13584	1.03063	1.25179	0.010221	ES	2.2	1	3	0
C16orf13	265882	1.12227	1.02764	1.22561	0.0102681	ES	4	1	5	1
TBC1D17	51116	1.19932	1.04385	1.37795	0.0102962	ES	4	3	5	0
SLC25A40	80344	1.15044	1.03354	1.28056	0.0103672	ES	3	2	4	0
NUP88	38676	1.24003	1.05178	1.46198	0.0104415	ES	2	1	3	0
PAM	72892	1.51944	1.10309	2.09293	0.0104517	ES	25.1:25.2	22	26.1	1
CCT3	8239	1.39007	1.07994	1.78926	0.0105557	ES	3	1	4	0
EPSTI1	25759	1.34078	1.07068	1.679	0.0106178	ES	12	11	13	0
COL1A1	406079	1.31447	1.06565	1.62138	0.0106546	ES	24:25:26:27:28:29:30:31:32:33	23	43	1
USH1C	206967	1.10569	1.02346	1.19451	0.0108262	ES	18:19:20:21	17	22	1
FHL2	54835	0.812629	0.692729	0.953282	0.0108534	ES	3.2	2.2	5.1	0
PSMD6	65521	1.62204	1.11795	2.35343	0.0108611	ES	3	2.2	4	0
CARD8	50718	0.859053	0.764131	0.965767	0.0109901	ES	4.1	3	5	0
DCAF6	8885	1.166	1.03582	1.31253	0.0110016	ES	00:12:13.100000	10	14	0
PRMT1	51042	1.16573	1.03574	1.31204	0.01102	ES	4.2:5	4.1	6	0
NFIA	3225	0.819142	0.702308	0.955413	0.0110567	ES	13	12	14	0
ACSM3	34389	1.12674	1.0275	1.23558	0.0111943	ES	5	4	6	0
PLA2G10	34100	1.11412	1.02475	1.21129	0.0113119	ES	4	3	5	0
ALG2	87057	1.16862	1.0354	1.31897	0.0116233	ES	2	1	3	0
ACAP3	74	1.80151	1.1396	2.84786	0.0117598	ES	21	20	22	0
LSM12	41759	1.19505	1.04031	1.37282	0.0117866	ES	6	5	7	0
DCTN2	22644	1.18351	1.03791	1.34955	0.0118887	ES	8	2	10	1
PGS1	43881	1.11104	1.02349	1.20608	0.011919	ES	2	1	3.1	0
USP33	3534	1.21021	1.04259	1.40477	0.0121306	ES	2	1	3	0
AP1B1	61603	1.22443	1.04521	1.43437	0.0121547	ES	24	23	25	0
TRNT1	62979	1.12274	1.02555	1.22914	0.0122105	ES	4	2	5	0
EEF1D	98099	1.24397	1.04848	1.4759	0.012326	ES	6	1	7.2	1
PBRM1	65239	1.21785	1.04363	1.42116	0.0123458	ES	28	27	29	0
MTA3	53371	1.12336	1.02545	1.23062	0.0124146	ES	7	6	8	0
EIF4H	80063	0.639421	0.449352	0.909885	0.012967	ES	5	4	6	0
SUMF2	79787	1.34411	1.06406	1.69787	0.0131058	ES	08:09:00	7	10.2	0
SNRNP200	54521	1.35598	1.06601	1.72482	0.0131122	ES	45	44	46.1	0
ZNF664	25125	1.14985	1.02971	1.284	0.0131397	ES	3	2.2	4	1
COL1A1	409264	0.720607	0.556092	0.933792	0.0132111	ES	20:21:22:23:24:25:26:28:29:30:31:32:33:34:35:36:37:38:39:40	19	41	1
COL1A1	430804	1.25288	1.04822	1.4975	0.0132323	ES	16:17:18:19:20:21:22:24:25:26:27:28:29:30:31:33:34:35	15	36	1
WIZ	48090	0.836279	0.72592	0.963415	0.0132814	ES	9	8	10	0
NABP1	56614	1.11574	1.02304	1.21684	0.0133334	ES	00:04:05.100000	3	5.2	0
SMG7	9184	1.16972	1.03307	1.32445	0.0133862	ES	2	1	3	0
COL1A1	265556	1.21575	1.04132	1.41939	0.0134214	ES	16:17:18:19:20:21:22:25:26:27:28:29:30:31:32:33:34:35	15	36	1
MAX	28008	1.23826	1.04505	1.4672	0.0135465	ES	2	1.2	3	0
FRG1B	58884	1.33745	1.06168	1.68484	0.0135866	ES	5	3	6	1
BANP	37993	0.828383	0.713212	0.962151	0.0136963	ES	9	6.2	10	0
COL1A1	444838	1.2127	1.04024	1.41375	0.0137371	ES	8:9:10:11:12:13:14:15:16:17:18:19:20:21:22:25:26:27:28:29:30:31:32:33:34:35:36:37:38:39:40:41:42:43:44:45:46	7	47	1
LMBR1L	21525	1.16509	1.03171	1.31571	0.0137726	ES	4.1:4.2	3	5	0
FKTN	87134	0.812598	0.688894	0.958515	0.0137855	ES	10:11:12	9	13.1	0
LPAR2	48666	1.13501	1.02618	1.25538	0.0137996	ES	03:04:00	2.2	5.2	0
PFKM	21429	1.14807	1.0284	1.28167	0.0139513	ES	8	7.3	9	0
MTMR2	18403	1.18192	1.03441	1.35047	0.0139983	ES	5	3	6	0
BCLAF1	77908	1.48833	1.08351	2.04441	0.0140816	ES	7	6	8	0
COL1A1	265671	0.786391	0.649076	0.952757	0.0141186	ES	15:36:37:38:39	14	40	1
NARF	44397	1.74076	1.11753	2.71157	0.0142319	ES	11.2:12	11.1	13.1	0
COL1A1	410149	1.23728	1.04349	1.46706	0.0142922	ES	19:20:21:22:25:26:27:28:29:30:31:32:33:34:35:36:37	18	38	1
RQCD1	57497	1.21883	1.04009	1.42828	0.0144524	ES	7	6	8	0
MCFD2	53478	1.11473	1.02172	1.21622	0.014556	ES	5	3	6	0
BIN1	55195	1.21242	1.03859	1.41534	0.0147055	ES	17	12	18	0
DCTN6	83284	1.117	1.02187	1.22099	0.0148337	ES	3	2	4	0
YWHAE	38298	0.807684	0.680055	0.959266	0.0149391	ES	03:06:00	1	7	0
CERS5	21684	1.25037	1.04413	1.49735	0.0151173	ES	4	1	8	0
RDH13	52003	1.24933	1.04392	1.49516	0.0151418	ES	8	7	9.1	0
ZMIZ2	79559	1.19135	1.03417	1.37241	0.0152883	ES	9	8	10	0
COL3A1	485142	0.766984	0.618991	0.950359	0.0152888	ES	12:13:14:17:18:19:20:21:22:23:24:25:26:27:28:29:30:31	11	32	1
GIPC1	47983	0.776934	0.633524	0.952809	0.0153389	ES	3	1	4	0
MRPL45	40572	1.34266	1.05797	1.70395	0.0153757	ES	4	3	5	0
GSN	87430	1.44656	1.07299	1.95021	0.0154293	ES	15.1:15.2	10	16	0
EIF4G3	952	1.29403	1.05021	1.59447	0.0155261	ES	18.1	17	19	0
NMNAT3	67037	0.787443	0.648745	0.955795	0.015635	ES	7	5	8	0
FPGT	3452	1.24675	1.04233	1.49126	0.0157907	ES	3	2.1	4	0
IRF3	51010	1.12402	1.02222	1.23596	0.0157932	ES	1.4:1.5:2	1.1	3	0
BRD9	71459	1.11184	1.01989	1.21208	0.0160792	ES	19	18.2	20	0
PPHLN1	21228	1.23816	1.04018	1.47381	0.0162546	ES	4	2	5	0
D2HGDH	58423	1.14787	1.02567	1.28463	0.0163395	ES	7.1:7.3	6	8	0
U2AF1L4	49270	1.15096	1.02593	1.29123	0.0165648	ES	8	7	9.1	0
TMEM180	12955	1.11802	1.02051	1.22485	0.016575	ES	4	3	5	0
RHBDD2	80128	1.19324	1.03239	1.37913	0.016778	ES	2	1	3	0
KLC1	29486	1.17203	1.02899	1.33494	0.0168323	ES	15	13.2	18	0
CCDC126	78982	0.833795	0.718268	0.967904	0.0169099	ES	2	1	5	0
CLK1	56755	1.48697	1.07376	2.05919	0.0169216	ES	5	4	6	0
IKBIP	23866	1.22624	1.03708	1.4499	0.0170394	ES	2	1	4	0
ARHGEF11	8338	1.12237	1.02081	1.23403	0.0170503	ES	39	38	40	1
RPS24	12296	1.12355	1.021	1.23641	0.0170593	ES	5.2	4	6	0
COL1A1	316104	0.857601	0.755896	0.972991	0.0170751	ES	20:21:22:23:24:28:29:30:31:32:33:34:35:36:37:38:39:40	19	41	1
CEP63	66882	1.16165	1.02691	1.31408	0.0172169	ES	12	11	13	0
CDK10	38127	1.1302	1.02191	1.24996	0.0172333	ES	3	2.1	5	0
PCNXL4	27769	0.890082	0.808716	0.979634	0.0172826	ES	2.1	1	3	0
FAM111A	16028	1.13428	1.02247	1.25833	0.0173319	ES	3.1	2	3.3	0
YDJC	61232	0.843145	0.732599	0.970373	0.0173414	ES	4	3	5	0
CPNE1	59192	0.701545	0.523811	0.939587	0.0174062	ES	2.1:2.2	1.2	5	0
SULT1A1	35819	1.24275	1.03864	1.48696	0.0175886	ES	4	3	6.2	0
ACTR6	23910	1.34301	1.05279	1.71323	0.0175902	ES	5	4	6	0
UBE2D4	79372	1.20525	1.03308	1.40611	0.0176073	ES	6	5.1	7.1	0
MFF	57813	1.11812	1.01956	1.22622	0.0177272	ES	03:04:05	1	6	0
POLR2J2	81129	1.16765	1.02717	1.32734	0.0177926	ES	3.1	2	3.3	0
BIN1	95667	1.26057	1.04071	1.52688	0.0178817	ES	17	13	18	1
ETHE1	95245	1.12373	1.02005	1.23794	0.0181785	ES	1.2:2:3	1.1	4	1
TMPO	23849	0.807663	0.676319	0.964514	0.018326	ES	06:07:08	5.1	9	0
BUD31	80622	1.57914	1.08004	2.30886	0.0184112	ES	4	3.2	6	0
GMIP	48669	1.25968	1.03967	1.52624	0.0184155	ES	14	13.2	15	0
ZNF140	25327	0.862927	0.763356	0.975486	0.0184368	ES	7	5.3	8.1	0
RPL6	399926	0.688865	0.504984	0.939703	0.0186473	ES	1.2:2:3:4	1.1	5	1
MTIF2	53607	1.15493	1.02421	1.30233	0.0187612	ES	4	3	5	0
REPIN1	82244	1.19351	1.02981	1.38324	0.0187648	ES	3.2:4.1:4.2	2.1	5.2	0
POMZP3	80187	1.09564	1.01527	1.18238	0.0187886	ES	4	3	5	0
TMEM5	22852	1.2146	1.03276	1.42845	0.0187976	ES	3	2	4	0
COL1A1	455722	1.23688	1.0358	1.477	0.0188467	ES	8:9:10:11:12:13:14:15:16:17:18:19:20:21:22:23:24:25:26:27:28:29:30:31:32:33:43:44:45:46	7	47	1
AMZ2	43129	0.668606	0.477737	0.935734	0.0189115	ES	06:07:00	5	8	0
ACIN1	26708	1.15494	1.02403	1.30259	0.018938	ES	4	3	5	0
STAG3	80920	1.10983	1.01732	1.21075	0.0189381	ES	5:6:7:8:9	4	10	1
SLC25A26	65549	1.15886	1.02451	1.31082	0.0190166	ES	3	2	4	0
MTSS1L	37410	1.15992	1.02464	1.31307	0.019048	ES	7	6	8	1
NDRG2	26512	0.840241	0.726368	0.971965	0.0191472	ES	4.5	4.1	5.2	0
MORF4L2	89777	0.778752	0.631488	0.960359	0.0193787	ES	4:5.1:5.2	3.2	5.3	0
CRCP	79873	1.12457	1.01909	1.24097	0.0194768	ES	4	3	5	0
MAP3K8	11124	1.2121	1.03127	1.42466	0.0196261	ES	2	1	3.2	0
MADD	15722	1.22816	1.03334	1.4597	0.0196932	ES	18	17	19	0
TXNL4A	46285	1.18913	1.02796	1.37558	0.0197503	ES	00:04:07.200000	3	9	0
SSB	55885	1.29665	1.04191	1.61368	0.019921	ES	6	5	7	0
IFT88	25431	1.10427	1.01579	1.20046	0.0199311	ES	2.1:2.2:2.3	1	3	0
ELP2	45219	1.23526	1.03386	1.4759	0.0199856	ES	6	5	7	0
FAM193A	68582	1.40037	1.05428	1.86008	0.0200778	ES	19	18	21	0
COL1A2	265306	1.22648	1.03203	1.45757	0.0204506	ES	15:37:00	14	38	1
NUBP2	33139	1.26294	1.03663	1.53867	0.0205031	ES	2	1	3	0
SVIL	11113	1.10262	1.01512	1.19766	0.0205718	ES	21	20	22	0
SEC31A	69734	1.16537	1.02378	1.32654	0.0205862	ES	16:17:00	15	18	0
FAM86C1	17440	0.891014	0.808073	0.982469	0.0206267	ES	3.1:3.2	2	5.1	0
SDHAF2	16230	1.26067	1.03573	1.53446	0.0208866	ES	3:4.1:5.1:5.2	1	6	0
TBC1D7	75381	0.761523	0.604331	0.959602	0.0209133	ES	3	2.2	4.1	0
BORA	26040	0.855386	0.749123	0.976722	0.0210007	ES	3	2	4	0
ETFA	31944	1.11819	1.01691	1.22955	0.0211066	ES	02:03:00	1	4	0
MARK3	29448	1.18225	1.02543	1.36306	0.0211216	ES	17:18:00	16	19	0
VPS53	38231	1.28357	1.03799	1.58725	0.0212186	ES	5	4	6	0
ZDHHC20	25452	1.20596	1.02818	1.41447	0.0213646	ES	14	13.2	15	0
SMAP1	76647	1.27585	1.03678	1.57005	0.0213822	ES	6	5.2	7	0
DCAF6	8886	1.24217	1.03268	1.49415	0.0213831	ES	00:11:13.100000	10	14	0
KIAA0040	9047	0.794867	0.653631	0.966622	0.0214441	ES	3	2	4	0
SNUPN	31882	1.18521	1.0254	1.36993	0.0214828	ES	3	1.1	4	0
GK5	67108	1.0975	1.01361	1.18833	0.0218417	ES	10	9	11	0
COL1A1	410215	1.24398	1.03196	1.49955	0.0220227	ES	19:20:21:22:23:24:25:26:27:28:29:30:31:33:34:35	18	38	1
TIMM8B	18730	1.2141	1.0283	1.43348	0.022067	ES	2	1	3	0
AP2B1	40319	1.25905	1.03357	1.53373	0.0221431	ES	16	15	17	0
VEGFA	76337	1.44541	1.05333	1.98343	0.022502	ES	7.1	6	8.1	0
SMUG1	22136	0.894736	0.813192	0.984456	0.0225316	ES	3	1.1	4.1	0
PKP4	55684	0.720381	0.543468	0.954882	0.0225452	ES	5	3	9	0
BCL7B	79959	1.15889	1.02094	1.31549	0.0225862	ES	2	1	3	0
HPCAL1	52659	1.24626	1.0313	1.50602	0.0226637	ES	6	5	7	0
ETFA	31939	1.11957	1.01577	1.23397	0.0228913	ES	02:03:04	1	5	0
CCT4	53708	1.39123	1.0466	1.84934	0.0229912	ES	2	1	3	0
PIEZO1	38024	1.47468	1.05441	2.06246	0.0232364	ES	45	44	46	0
CD44	15270	0.91907	0.854434	0.988595	0.0233126	ES	3.1:3.2:4:5:7:8:9.1:9.2:10:11:12.1:13:14:15:16.1:16.2:17.1	2.1	17.2	0
CTBP1	68464	0.560955	0.340338	0.924581	0.023358	ES	2.2	1	3.1	0
SLC35E2B	207	1.11586	1.01493	1.22682	0.0234271	ES	2	1	3	0
MST1R	64927	1.27522	1.03338	1.57367	0.0234522	ES	11	10	12	0
NMNAT3	67038	1.21313	1.02639	1.43383	0.0234864	ES	6	5	7	0
MYB	77818	1.12686	1.01623	1.24954	0.0234871	ES	17	16	19.1	0
POC1B	23629	0.842481	0.726241	0.977326	0.0236525	ES	12	10	13	0
RRN3	34139	0.867035	0.766205	0.981135	0.0237033	ES	12:13:00	11.1	14	1
GRN	522183	1.16761	1.02071	1.33565	0.0238966	ES	04:05:10	3	11	1
COL1A1	405914	1.27706	1.03252	1.57951	0.0241288	ES	24:25:26:27:28:29:30:31:33:34:35:36:37:38:41:42	23	43	1
ODF3B	62862	0.883018	0.792514	0.983857	0.0241365	ES	3.1:3.2	2.2	4.2	0
LRR1	27428	1.19163	1.02309	1.38794	0.0242377	ES	5	3	7	0
ABLIM2	68747	1.14311	1.01753	1.2842	0.0242786	ES	21:22:00	18.2	23	0
ARHGAP27	41966	1.20537	1.0242	1.41859	0.0245972	ES	12	11	13	0
RMDN1	84377	1.39646	1.04352	1.86877	0.0246694	ES	6	4	7	0
CASK	88862	1.15819	1.0188	1.31665	0.0247925	ES	21	20	22	0
P4HTM	64788	1.15291	1.01806	1.30562	0.0249586	ES	6.2:7.1	6.1	7.2	0
EXOC7	43572	0.88566	0.796386	0.984941	0.0250999	ES	8.2	6	9	0
WARS	29289	0.681821	0.487345	0.953905	0.0253904	ES	4	2.3	7	0
BCOR	88829	0.872261	0.773727	0.983343	0.0254424	ES	6	5	7	0
COL1A2	316193	1.23966	1.02676	1.49671	0.0254425	ES	9:10:11:12:13:14:15:16:17:18:19:20:21:22:23:24:25:26:27:28:29:30:31:36:37:38:39:40:41:42:43:44	8	45	1
SPATA20	42427	1.12407	1.01442	1.24556	0.0255185	ES	5	4.2	6	0
SYT7	16268	1.14818	1.01697	1.29633	0.0256324	ES	4	3	9	0
TRIM33	4324	0.829227	0.703465	0.977472	0.025649	ES	20	19	21	0
SEC16A	88173	1.18488	1.02083	1.37529	0.0256742	ES	25	24	26	0
PTRH2	42793	1.33696	1.0357	1.72583	0.0257955	ES	2.2	1	2.4	0
METTL23	43647	0.851705	0.739551	0.980867	0.0258725	ES	2	1.1	3	0
CLDND1	65783	0.636094	0.426839	0.947933	0.0262384	ES	3.3:3.4	1	4.1	0
CD46	9652	1.22135	1.02375	1.45708	0.0263751	ES	13	12	14	0
BRD8	73509	0.790473	0.642204	0.972974	0.0265223	ES	10	9	11	0
WAC	11103	1.62458	1.05786	2.49492	0.0266278	ES	12	11.2	13	0
FOXP1	65608	1.07471	1.00822	1.14558	0.0270238	ES	07:08:00	6	10	0
PLA2G15	37203	1.10463	1.01136	1.2065	0.0270463	ES	2	1	3	0
IYD	78146	1.27593	1.02802	1.58361	0.0270583	ES	6.1	5	7	0
COL1A1	265287	0.844568	0.727079	0.981043	0.0270777	ES	28:29:30:31:32:33:34:35:36:37	24	38	1
KIF13A	75457	0.888868	0.800687	0.98676	0.0271057	ES	40	39	41.1	0
RFX5	7609	1.16787	1.01769	1.34022	0.0271339	ES	7	6.2	8	0
COL1A1	410160	1.24589	1.02507	1.51426	0.02719	ES	19:20:21:22:24:25:26:27:28:29:30:31:33:34:35:36:37	18	38	1
MFF	57815	1.14657	1.01545	1.29463	0.0272808	ES	5	1	6	0
SH3BP2	68600	1.49535	1.04536	2.13904	0.0276072	ES	8.1	7	9	0
NMRAL1	33734	1.2746	1.02698	1.58193	0.027702	ES	3	2.6	5	0
CASP8	56825	0.878771	0.783252	0.985939	0.0277251	ES	10	8	11	0
CCM2	79585	0.750418	0.581114	0.969047	0.0277369	ES	3	1	4	0
CS	22418	1.25727	1.02485	1.5424	0.0281407	ES	6	5.2	7	0
RUVBL2	50861	1.284	1.02689	1.60548	0.0283306	ES	3	2	4	0
TRAFD1	24579	1.13485	1.01351	1.27072	0.0283393	ES	5	4	6.1	0
NDRG1	85246	1.14325	1.01423	1.28868	0.0284343	ES	2.2:2.3:3:4:5.1:5.2:6:7.1:7.2:8:9:10:11:12:13:14:15:16.1	2.1	16.2	0
NKIRAS2	40978	1.23711	1.02271	1.49645	0.028436	ES	6	5.6	7	0
ATP11C	90245	0.835567	0.71146	0.981322	0.0285396	ES	32	29	33	0
ISY1	66700	1.30266	1.02798	1.65074	0.0286461	ES	9	8	10.1	0
SEC31A	69732	0.911557	0.838991	0.9904	0.0286789	ES	26.1	25.1	28	0
ARMC10	81164	1.20371	1.01928	1.4215	0.0288834	ES	2	1	5.1	0
CFLAR	56799	1.09868	1.00973	1.19546	0.0289106	ES	10	8.1	11	0
TRMT1	47918	1.24823	1.02291	1.52319	0.0290369	ES	9	8	10	0
HAUS3	68549	0.823427	0.691335	0.980758	0.0294244	ES	4.2:5.1	4.1	5.2	0
ZNF226	50293	1.25184	1.02271	1.53232	0.0294315	ES	4	3.3	5	0
KDM5C	89196	1.27281	1.02425	1.58169	0.0295461	ES	4	3	5	0
KXD1	48464	1.50281	1.04091	2.16968	0.0297083	ES	3.2	1.1	4.2	0
STX16	59970	0.86227	0.754378	0.985593	0.0298004	ES	7	6	8	0
VPS45	7421	1.34223	1.02917	1.75053	0.0298456	ES	16	15	17	0
ZDHHC4	78754	0.905194	0.827338	0.990376	0.0299521	ES	1.3	1.1	2.2	0
TRA2A	78977	1.12614	1.01154	1.25373	0.0300445	ES	3.1:3.2	1	4	0
STYXL1	80150	0.576208	0.349996	0.94863	0.0302128	ES	5	4	6	0
ELP4	14825	1.18661	1.01648	1.38521	0.030233	ES	10:11:00	9	12	0
SIRT2	49711	1.11653	1.01056	1.23361	0.0302731	ES	6	4	7	0
ATL2	53255	1.10315	1.00934	1.20568	0.0303869	ES	3	1	5	0
CERS5	21681	1.08777	1.00796	1.17391	0.0304731	ES	6.1:6.2	1	8	0
MRPL52	26644	1.24004	1.02046	1.50686	0.0304898	ES	1.2:1.4	1.1	1.5	0
PRKRIP1	97666	1.27082	1.02268	1.57917	0.0305965	ES	6	4	7	1
ZNF664	25126	1.18758	1.0161	1.38799	0.0307167	ES	03:04:00	2.2	5	0
HNRNPD	69703	0.647819	0.436768	0.960854	0.0308887	ES	2	1.3	3	0
TFDP2	67101	1.16586	1.01411	1.34032	0.0310089	ES	4	3.1	6	0
IRF3	51011	1.17255	1.01458	1.35512	0.0310871	ES	1.5:2	1.1	3	0
CCBL2	3704	1.18054	1.01508	1.37297	0.031225	ES	2	1	3	0
COBL	79730	1.35412	1.02756	1.78448	0.0313162	ES	9	8	12	0
TGFBR2	63806	1.1724	1.01426	1.3552	0.0314387	ES	2	1	3	0
PPIP5K2	72917	1.11756	1.00993	1.23666	0.0314626	ES	26	25	27	1
CD44	15268	0.915667	0.845014	0.992228	0.0315239	ES	3.1:3.2:4:5:6:7:8:9.1:9.2:10:11:12.1:13:14:15:16.1:16.2:17.1	2.1	17.2	0
MMAB	24322	1.18279	1.01497	1.37837	0.0315356	ES	5	4	6	0
SLMAP	65401	1.17805	1.0145	1.36796	0.03165	ES	14	12	15.2	1
MRPS28	84266	0.641753	0.428098	0.96204	0.0317683	ES	4.1:4.2	1	5	0
CEACAM1	50166	1.15339	1.0124	1.31401	0.0319403	ES	7	4	8	0
COL1A1	451232	1.45058	1.03253	2.03789	0.0319927	ES	8:9:10:11:12:13:14:15:16:17:18:19:41:42:43:44:45:46	7	47	1
ANKRD10	26274	1.10336	1.0085	1.20714	0.0319976	ES	4	3	6.1	0
DAPK2	31076	1.14927	1.01195	1.30523	0.0321189	ES	13.2:13.3:13.4:14:15.1:15.2	13.1	15.3	0
PI4KB	7600	1.1137	1.00919	1.22904	0.0321922	ES	2	1	4	0
NPIPB3	93952	1.20129	1.01568	1.42082	0.032225	ES	8.5:8.6:8.7:8.8:9:10:11	8.4	12.1	1
SYBU	84918	0.893249	0.805489	0.990571	0.0323936	ES	7.4	6.2	8	0
ERCC1	50445	0.822679	0.68784	0.98395	0.0325883	ES	00:08:10.100000	7	11	0
DLG1	68293	0.846082	0.725625	0.986535	0.0329271	ES	09:10:00	7	11	0
NAPA	50658	1.17971	1.01341	1.37331	0.0330243	ES	02:03:04	1	5	0
SPAG9	42494	1.11217	1.00857	1.22642	0.033092	ES	30	29	31	0
DMKN	49204	1.1472	1.01073	1.3021	0.0335787	ES	7	6.4	12	0
CAMTA1	508	1.3087	1.02105	1.67738	0.0336321	ES	2	1	4	1
SUOX	22340	1.13818	1.0099	1.28276	0.0338868	ES	3	2	5.2	0
GDPD5	17862	1.11625	1.0084	1.23565	0.0339011	ES	09:10:00	8	13	0
B3GALNT2	10355	1.11834	1.00847	1.24017	0.0340275	ES	2	1	3	0
ME3	18199	1.10338	1.00741	1.2085	0.0340942	ES	10	8	11	0
UBE2C	59607	1.17184	1.01184	1.35715	0.034255	ES	3.2	1.4	4	0
FEZ2	53197	0.731628	0.547817	0.977115	0.0342776	ES	9	7	10	0
SIRT7	44237	1.30654	1.01984	1.67384	0.0343971	ES	4	3	5	0
TMEM256-PLSCR3	38937	0.834459	0.70556	0.986906	0.0345216	ES	8	7	9.1	0
MON2	22839	0.897855	0.812431	0.992261	0.0346628	ES	31	30	32	0
SUMF2	79786	1.14822	1.00996	1.30541	0.0347397	ES	00:08:10.100000	7	10.2	0
AFTPH	53773	1.25868	1.01626	1.55893	0.0350515	ES	8	7	9	0
RRAGB	89285	1.30692	1.01877	1.67656	0.0351763	ES	4	3	5	0
MARVELD2	72373	0.79955	0.649104	0.984865	0.0354345	ES	3	2.4	4	0
CHMP7	83073	1.11165	1.00717	1.22697	0.0355672	ES	4	3	5	0
FAM92A1	84523	1.33062	1.01916	1.73727	0.0357743	ES	11	10	12.1	0
COL1A1	267002	0.679945	0.47424	0.974874	0.0358707	ES	15:16:17:18:19:20:21:22:23:24:25:26	14	28	1
BFAR	34098	1.1761	1.01067	1.36861	0.0359778	ES	4	2	5	0
TMEM107	39116	1.11394	1.00702	1.23221	0.0360892	ES	3.2:3.3:3.4:3.5	2	3.7	0
TCF3	46542	0.685854	0.482015	0.975893	0.0361202	ES	00:04:05.100000	3	6.1	0
AFG3L2	205724	1.81473	1.03869	3.17058	0.0363229	ES	3	2	4	1
ANAPC11	44218	1.294	1.01652	1.64724	0.0363489	ES	6	3.2	7.2	0
ACTR10	27682	1.12826	1.00762	1.26336	0.0364848	ES	3	2	4	0
VEZT	23786	1.16282	1.00943	1.33952	0.0366231	ES	5	4	6.1	0
ZNF317	47267	1.31531	1.01685	1.70137	0.0368713	ES	5.2	4	6	0
NDUFAF5	58707	1.1634	1.00908	1.34132	0.0371219	ES	9	8	10	0
PCBP2	22055	3.26592	1.07312	9.93946	0.037138	ES	12:13:00	11.2	14.1	0
ZKSCAN1	80872	1.07932	1.00456	1.15964	0.0371431	ES	2	1	3.1	0
HMOX2	33749	1.32791	1.01693	1.73399	0.0372285	ES	3	2.2	7	0
FBXO22	31902	0.72043	0.528955	0.981215	0.0375006	ES	2	1	3	0
PLD1	67636	1.15221	1.00822	1.31677	0.0375175	ES	16	15	17	0
DNAJC12	11904	1.07673	1.0042	1.1545	0.0377386	ES	2	1	3	0
ADCK1	28635	1.0939	1.00507	1.19059	0.037804	ES	4	3	5	0
HRAS	13685	1.194	1.01001	1.41152	0.0378366	ES	6	5	7.1	0
NT5C3B	40954	1.23761	1.01203	1.51346	0.037852	ES	3	2	4	0
PUF60	85504	1.44661	1.02073	2.05017	0.0379579	ES	3	1	4	0
DECR2	32892	1.11093	1.00585	1.22698	0.0379782	ES	3	2	4.1	0
COL1A1	206078	0.845299	0.721042	0.99097	0.038285	ES	18:19:20:21:22:23:24:25:26:27:28:29:30:31:32:33:34:35:36:37:38:39	14	40	1
AP2S1	50600	0.859135	0.744138	0.991902	0.0383719	ES	4.1:4.2	3.2	5	0
NCOA1	52826	1.32384	1.0151	1.72648	0.0384001	ES	00:24:25.100000	23	25.2	0
TLDC2	156238	0.851991	0.732105	0.991509	0.0384364	ES	4	3	5	1
UBE2I	33061	0.64064	0.42024	0.976632	0.0384637	ES	4.2:4.3	2	5.2	0
MPST	62077	1.07083	1.00363	1.14253	0.0384895	ES	2.2	1.1	3	0
SNX11	42174	1.08418	1.00419	1.17055	0.0387549	ES	5	4	6	0
RABL2A	55061	0.850726	0.729763	0.991739	0.0388312	ES	06:07:00	5.2	8.1	0
IL15RA	10684	1.29473	1.0133	1.65432	0.0388656	ES	3	2	4	0
DDX19A	37382	1.10678	1.00518	1.21865	0.0389104	ES	2	1	3	0
SLC7A6	37213	1.11713	1.00561	1.24101	0.0389954	ES	3	2.2	4	0
C12orf43	24819	1.08754	1.0042	1.17779	0.0391104	ES	2	1	3.1	0
U2SURP	67124	1.99088	1.03498	3.82964	0.0391166	ES	27	26	28	1
UBE2C	59605	1.10074	1.00476	1.2059	0.0392163	ES	2:3.1:3.2	1.4	4	0
SETD5	63100	0.887177	0.791735	0.994124	0.0392601	ES	4	3	6	0
SLC12A9	81006	1.34214	1.01458	1.77546	0.0392696	ES	03:04:00	2	5	0
UVRAG	17885	1.2819	1.01229	1.62332	0.0392696	ES	20	19.2	21	0
UIMC1	74693	1.3682	1.01548	1.84343	0.0393061	ES	6.1:7.1:7.2	5	8	0
KIAA0430	34178	0.83558	0.704341	0.991272	0.0393482	ES	8.1:8.2:8.3	7	9	0
FAM114A1	69037	0.869242	0.760743	0.993215	0.0393946	ES	2	1	3	1
CKLF	36729	1.40204	1.01622	1.93435	0.0395964	ES	3.2	2	4	0
2018-09-02	58377	1.17819	1.00779	1.3774	0.0396527	ES	4	2	7	0
DDX49	48529	1.71658	1.02587	2.87233	0.0396651	ES	3.1:3.2	2.2	4	0
COPS7B	57953	1.25121	1.01065	1.54904	0.0396672	ES	4.1:4.2:4.3:4.4:5	3	6	0
CASP8	56824	0.823345	0.684075	0.990968	0.0397891	ES	09:10:00	8	11	0
CKLF	36735	1.25874	1.01049	1.56797	0.0400618	ES	2	1	3.2	0
RRP8	14160	1.1289	1.00551	1.26743	0.0400796	ES	2.1:2.2:3.1:3.3	1	4	0
ARPC4	63183	1.10597	1.00441	1.2178	0.0404223	ES	05:06:00	4	7	1
COL1A1	106078	0.345019	0.124604	0.955332	0.0405694	ES	32	31	33	1
MTMR14	63110	0.783976	0.621032	0.989673	0.0406296	ES	20	19	21	0
NDUFAF1	30087	1.12529	1.00502	1.25996	0.0406777	ES	4	3	5	0
NUMA1	17518	1.14011	1.00557	1.29266	0.0406938	ES	4	3	5	0
FRG1	71414	1.47079	1.01646	2.12821	0.0407005	ES	05:06:00	4	7	1
RCOR3	9711	1.131	1.00497	1.27284	0.0411388	ES	5	4	6	0
SYTL2	18148	0.877118	0.773401	0.994744	0.0411473	ES	13	12.2	14	0
RABL2B	62927	1.10782	1.00398	1.2224	0.0414496	ES	2.1:2.2:2.3:3.1	1	3.2	0
DCAF6	8883	1.17468	1.00614	1.37144	0.0416033	ES	12	10	13.1	0
ABI2	57055	0.694099	0.488381	0.98647	0.0417584	ES	5.3:8:10:11:12	5.2	14	0
SIGLEC10	51334	0.877439	0.773365	0.99552	0.0423903	ES	8	7	9	0
CAMLG	73424	1.64924	1.01659	2.67562	0.0427038	ES	2	1	3	0
CCNL1	67383	1.11168	1.00343	1.23161	0.0428246	ES	7	6	9	0
MLLT4	78456	1.10916	1.00334	1.22615	0.0428544	ES	16	15	17	0
ETHE1	95248	1.20781	1.00588	1.45027	0.043094	ES	2	1.1	4	1
RPAP1	30096	1.20042	1.00559	1.43299	0.0432082	ES	22.2:23.1	22.1	23.2	0
FCGRT	50968	0.907968	0.826833	0.997065	0.0432279	ES	03:07:00	2.2	8.1	0
GPHN	28036	1.077	1.00221	1.15737	0.0433684	ES	2	1	3	0
MKNK1	2814	1.2221	1.00598	1.48464	0.0433782	ES	4	3	5	0
PHPT1	88225	1.17662	1.00464	1.37805	0.0436548	ES	4	3	5	0
SLC12A2	73194	0.508013	0.262935	0.981526	0.0438569	ES	21	20	22	0
CHID1	13814	1.51001	1.01136	2.25451	0.0438843	ES	6.1:6.2:6.3	5.2	7	0
LYRM5	20815	1.2925	1.00678	1.6593	0.0441167	ES	2.1:2.2	1.1	3.1	0
ALDH5A1	75516	1.16863	1.00404	1.3602	0.0442203	ES	5	4	6	0
ZNF410	28327	1.54192	1.01114	2.35131	0.0442807	ES	15	13	16	0
USP53	70462	1.11426	1.00266	1.23829	0.0445118	ES	2	1	3	1
FDPS	8072	1.27017	1.00588	1.60389	0.0445143	ES	00:02:03.100000	1.1	3.2	0
PPIF	12305	0.817073	0.670567	0.995587	0.045088	ES	00:05:06.100000	4.1	6.2	0
FTSJ2	78605	1.15373	1.00288	1.32727	0.0454725	ES	4	2	5	0
CCDC101	35755	1.25833	1.00462	1.57612	0.0454952	ES	5	4	6	0
PIGP	60543	1.28063	1.00492	1.63199	0.0455395	ES	4	3.2	5	0
SEC31A	69731	0.886011	0.786886	0.997623	0.045579	ES	26.1:26.2	25.1	28	0
PEX2	84241	0.881384	0.778741	0.997556	0.0456405	ES	4.2	2.2	5	0
NQO1	37304	2.27806	1.01585	5.10857	0.0457029	ES	4	3	5	0
REPIN1	82236	0.890241	0.794269	0.99781	0.0457555	ES	4.2:5.2	3.2	5.3	1
WDR45	89085	1.50937	1.00763	2.26095	0.0458437	ES	6	5	7.2	0
SYNE2	27846	1.12701	1.00211	1.26746	0.0460217	ES	118	117.2	119.2	0
SMARCA2	85726	1.21137	1.00327	1.46263	0.0461613	ES	33	32	34	0
COL1A1	316159	1.21056	1.00299	1.46108	0.0464673	ES	16:17:18:19:20:21:22	15	25	1
SETD5	63098	0.925736	0.858019	0.998798	0.0464806	ES	04:05:00	3	6	0
LTBP4	49930	1.55807	1.00684	2.4111	0.0465293	ES	30	29	31	1
EIF2A	67287	1.23619	1.00321	1.52327	0.0465827	ES	3	2	4	0
L3MBTL2	62412	1.33449	1.00381	1.7741	0.0470167	ES	16	15	17	0
VKORC1	36232	1.17369	1.00203	1.37476	0.0471354	ES	4.1:4.2	2	6	0
KIF12	87305	1.10864	1.0013	1.22749	0.0471462	ES	15	14	16	0
GOLGA4	63982	0.845984	0.717122	0.998001	0.0472896	ES	24	23	25	0
ZNF384	19926	1.19777	1.00214	1.43158	0.0473208	ES	5	4	6.1	0
SAR1B	73418	1.13801	1.00149	1.29313	0.0473896	ES	6	5.2	8	0
SCP2	3045	1.1101	1.00118	1.23087	0.0474425	ES	12	11	13	0
MGRN1	33782	1.20693	1.00198	1.45379	0.0476108	ES	12	11	13	0
SVIL	11116	1.08647	1.00061	1.17971	0.0483366	ES	10:11:12	9	13	0
RNF43	42675	0.883002	0.780356	0.999151	0.0484461	ES	1.3:1.4	1.1	3	0
SZRD1	811	1.20751	1.00112	1.45644	0.0486419	ES	3	1	4.2	0
TRPC4AP	59059	0.793867	0.631023	0.998735	0.0487498	ES	9.2	8	10	0
PAXIP1	82431	1.09698	1.00049	1.20278	0.0487928	ES	5	4	6	0
PTK2B	83156	0.874136	0.764645	0.999304	0.0488206	ES	28	27	29	0
NDRG1	85254	1.10267	1.00036	1.21544	0.049157	ES	2.2:14:15:16.1	2.1	16.2	0
[truncated: 159 more rows]
